# Supplementary material for: K2S2O8-mediated metal-free direct C–H functionalization of quinones using arylboronic acids
Source: Royal Society of Chemistry journal article supplement (doi:10.1039/c5qo00246j), 2015-01-01
Supplement: c5qo00246j1.pdf [file c5qo00246j1.pdf]

## Supporting Information

### **K<sub>2</sub>S<sub>2</sub>O<sub>8</sub>-Mediated Metal-Free Direct C-H Functionalization of Quinones Using Arylboronic acids**

Andivelu Ilangovan,\* Ashok Polu and Gandhesiri Satish

School of Chemistry, Bharathidasan University, Tiruchirappalli-620 024, Tamil Nadu, India.

E-mail: [ilangovanbdu@yahoo.com](mailto:ilangovanbdu@yahoo.com)

|                                           |      |
|-------------------------------------------|------|
| General Information                       | S 2  |
| Arylation of Quinones                     | S 2  |
| Arylation of Heterocycles                 | S3   |
| Characterization of synthesized compounds | S 3  |
| NMR spectra                               | S 18 |
| Reference                                 | S 79 |

## General Information:

All the reagents were purchased commercially and used without further purification.  $^1\text{H}$  NMR and  $^{13}\text{C}$  NMR were recorded with Bruker 400MHz.  $^1\text{H}$  NMR (400MHz) and  $^{13}\text{C}$  NMR (100MHz) spectra were recorded in  $\text{CDCl}_3$  with tetramethylsilane as the internal standard.  $^{19}\text{F}$  NMR recorded in Bruker 376.5 MHz. Multiplicities are reported using the following abbreviations: s = singlet, d = doublet, t = triplet, q = quartet, m = multiplet, br = broadresonance. All the NMR spectra were acquired at ambient temperature. Analytical thin layer chromatography (TLC) was performed using Silica Gel 60 Å F254 pre-coated plates (0.25 mm thickness). Visualization was accomplished by irradiation with a UV lamp and staining with  $\text{I}_2$  on silica gel. High-resolution mass spectra (HRMS) were recorded on Bruker Compass DataAnalysis 4.1, HRMS-ESI Mass Spectrometer with Quadrupole Time of Flight (Q-TOF) Analyzer, Source Type ESI, in positive mode. Instrument micrOTOF-Q III 8228888.20471.

## General Procedure A: Arylation of Benzoquinones

To a solution of benzoquinone (1.0 equiv.) in 1:1 v/v of DCE (2 mL) and  $\text{H}_2\text{O}$  (2 mL) was added potassium persulfate (2.0 equiv.) and corresponding phenylboronic acid (1.5 equiv) at ambient temperature and heated at reflux. Progress of the reaction was monitored by TLC. Upon complete consumption of quinone, the reaction mixture was allowed to cool to ambient temperature and diluted with ethyl acetate and water. The organic phase was separated, extracted two more times with ethyl acetate, dried over  $\text{Na}_2\text{SO}_4$ , filtered and concentrated. The crude product was purified by silica gel column chromatography using hexane / ethyl acetate as eluent.

## General Procedure B: Arylation of Naphthoquinones

To a solution of 1,4-naphthoquinone (1.0 equiv.) in 1:1 v/v of DCE (2 mL) and  $\text{H}_2\text{O}$  (2 mL) was added potassium persulfate (2.0 equiv.), phenylboronic acid (1.5 equiv.) and triethylamine (10.0 equiv.) at ambient temperature and heated at reflux. Progress of the reaction was monitored by TLC. Upon complete consumption of quinone, the reaction mixture was allowed to cool to ambient temperature and diluted with ethyl acetate and water. The organic phase was separated, extracted two more times with ethyl acetate, dried over  $\text{Na}_2\text{SO}_4$ , filtered and concentrated. The crude product was purified by silica gel column chromatography using hexane / ethyl acetate as eluent.

### General Procedure C: Arylation of Heterocycles

To a solution of heterocyclic (1.0 equiv.) compound in 1:1 v/v of DCE (2 mL) and H<sub>2</sub>O (2 mL) was added potassium persulfate (2.0 equiv.), and corresponding phenylboronic acid (1.5 equiv.) at ambient temperature and heated at reflux. Progress of the reaction was monitored by TLC. Upon complete consumption of the heterocycle, the reaction mixture was allowed to cool to ambient temperature and diluted with ethyl acetate and water. The organic phase was separated, extracted two more times with ethyl acetate, dried over Na<sub>2</sub>SO<sub>4</sub>, filtered and concentrated. The crude product was purified by silica gel column chromatography using hexane / ethyl acetate as eluent.

#### Preparation of 2-Phenylcyclohexa-2,5-diene-1,4-dione (**3aa**):

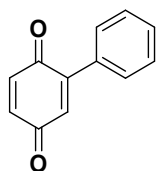

The reaction was carried out according to **general method A** using 1,4-benzoquinone **1a** (100 mg, 0.925 mmol), phenylboronic acid **2a** (169.3 mg, 1.388 mmol), potassium persulfate (500.6 mg, 1.852 mmol), 4 mL of 1:1 v/v of DCE-water. Conditions: 80 °C, 1h.30 min.

The title compound **3aa** (170 mg, 72% yield) was obtained as yellow solid after passing through a short silica gel column chromatography (hexane/ethyl acetate, 95:05).

m.p.: 112 °C. <sup>1</sup>H NMR (400 MHz, CDCl<sub>3</sub>): 7.49-7.43 (m, 5H), 6.93-6.78 (m, 3H); <sup>13</sup>C NMR (100 MHz, CDCl<sub>3</sub>): δ 187.6, 186.7, 146.0, 137.1, 136.2, 132.7, 130.1, 129.3, 128.6. The spectral data of the compound **3aa** complies with the values reported in the literature.<sup>1,3</sup>

#### Preparation of 2-(4-Methoxyphenyl) cyclohexa-2,5-diene-1,4-dione (**3ab**):

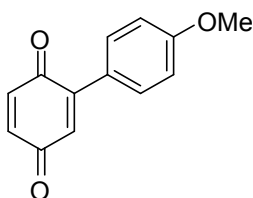

The reaction was carried out according to **general method A** using 1,4-benzoquinone **1a** (100 mg, 0.925 mmol), 4-Methoxyphenylboronic acid **2b** (214.2 mg, 1.388 mmol), potassium persulfate (500.6 mg, 1.852 mmol), 4 mL of 1:1 v/v of DCE-water. Conditions: 80 °C, 24 h.

The title compound **3ab** (153 mg, 77% yield) was obtained as yellow solid after passing through a short silica gel column chromatography (hexane/ethyl acetate, 95:05).

m.p.: 107 °C. <sup>1</sup>H NMR (400 MHz, CDCl<sub>3</sub>): δ 7.48 (d, *J* = 8.0 Hz, 2H), 6.97 (d, *J* = 8.0 Hz, 2H), 6.85-6.79 (m, 3H), 3.86 (s, 3H); <sup>13</sup>C NMR (100 MHz, CDCl<sub>3</sub>): δ 187.6, 187.1, 161.5, 145.2, 137.0, 136.3, 131.1, 130.9, 125.0, 114.2, 55.4. The spectral data of the compound **3ab** was complies with the values reported in the literature.<sup>3</sup>

#### Preparation of 2-(4-Isopropoxyphenyl) cyclohexa-2,5-diene-1,4-dione (**3c**):

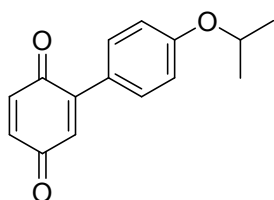

The reaction was carried out according to **general method A** using 1,4-benzoquinone **1a** (100 mg, 0.925 mmol), 4-isopropoxyphenylboronic acid **2c** (250 mg, 1.388 mmol), Potassium persulfate (500.6 mg, 1.852 mmol), 4 mL of 1:1 v/v of DCE-water. Conditions: 80 °C, 5 h.

The title compound **3ac** (157 mg, 70% yield) was obtained as dark red solid after passing through a short silica gel column chromatography (hexane/ethyl acetate, 95:05).

m.p.: 98-100 °C. <sup>1</sup>H NMR (400 MHz, CDCl<sub>3</sub>): δ 7.46 (d, *J* = 7.6 Hz, 2H), 6.94 (d, *J* = 8.4 Hz, 2H), 6.85-6.78 (m, 3H), 4.64-4.58 (m, 1H), 1.36 (d, *J* = 6.4 Hz, 6H); <sup>13</sup>C NMR (100 MHz, CDCl<sub>3</sub>): δ 187.7, 187.1, 159.9, 145.3, 137.0, 136.5, 136.2, 130.9, 124.6, 115.7, 70.1, 22.0. HRMS (ESI-microTOF-III): calcd. for C<sub>15</sub>H<sub>14</sub>O<sub>3</sub>Na 265.0835; found 265.0835.

#### Preparation of 2-(4-*tert*-butylphenyl) cyclohexa-2,5-diene-1,4-dione (**3ad**):

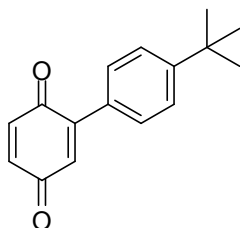

The reaction was carried out according to **general method A** using 1,4-benzoquinone **1a** (100 mg, 0.925 mmol), 4-*tert*-butylphenylboronic acid **2d** (247.3 mg, 1.388 mmol), potassium persulfate (500.6 mg, 1.852 mmol), 4 mL of 1:1 v/v of DCE-water. Conditions: 80 °C, 3 h.

The title compound **3ad** (145 mg, 65% yield) was obtained as yellow solid after passing through a short silica gel column chromatography (hexane/ethyl acetate, 95:05).

m.p.: 71-74 °C. <sup>1</sup>H NMR (400 MHz, CDCl<sub>3</sub>): δ 7.49-7.43 (m, 4H), 6.87-6.80 (m, 3H), 1.35 (s, 9H); <sup>13</sup>C NMR (100 MHz, CDCl<sub>3</sub>): δ 187.7, 186.9, 153.7, 145.8, 137.1, 136.2, 132.1, 129.8, 129.1, 125.6, 34.8, 31.2. The spectral data of the compound **3ad** was complies with the values reported in the literature.<sup>1</sup>

#### Preparation of 2-*O*-Tolylcyclohexa-2,5-diene-1,4-dione (**3ae**):

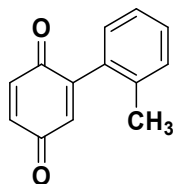

The reaction was carried out according to **general method A** using 1,4-benzoquinone **1a** (100 mg, 0.925 mmol), 2-methylphenylboronic acid **2e** (1.388 mmol, 189 mg), potassium persulfate (500.6 mg, 1.852 mmol), 4 mL of 1:1 v/v of DCE-water. Conditions: 80 °C, 2 h 30 min.

The title compound **3ae** (110 mg, 60% yield) was obtained as yellow oil after passing through a short silica gel column chromatography (hexane/ethyl acetate, 95:05).<sup>1</sup>H NMR (400 MHz, CDCl<sub>3</sub>): δ 7.34 (t, *J* = 7.6 Hz, 1H), 7.27-7.22 (m, 2H), 7.10 (d, *J* = 7.6 Hz, 1H), 6.89-6.83 (m, 2H), 6.72 (d, *J* = 2.0 Hz, 1H), 2.18 (s, 3H); <sup>13</sup>C NMR (100 MHz, CDCl<sub>3</sub>): δ 187.7, 186.2, 148.5, 136.9, 136.4, 136.1, 134.5, 133.1, 130.4, 129.5, 129.2, 125.8, 20.3. The spectral data of the compound **3ae** was complies with the values reported in the literature.<sup>3</sup>

#### Preparation of 2-(2-(Trifluoromethoxy) phenyl)cyclohexa-2,5-diene-1,4-dione (**3af**):

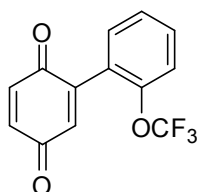

The reaction was carried out according to **general method A** using 1,4-benzoquinone **1a** (100 mg, 0.925 mmol), 2-trifluoromethoxyphenylboronic acid **2f** (286 mg, 1.388 mmol), potassium persulfate (500.6 mg, 1.852 mmol), 4 mL of 1:1 v/v of DCE-water. Conditions: 80 °C, 20 min.

The title compound **3af** (167 mg, 67% yield) was obtained as dark yellow oil after passing through a short silica gel column chromatography (hexane/ethyl acetate, 95:05).<sup>1</sup>H NMR

(400 MHz, CDCl<sub>3</sub>):  $\delta$  7.49 (td,  $J$  = 7.9, 1.6 Hz, 1H), 7.39-7.34 (m, 2H), 7.30-7.27 (m, 1H), 6.91-6.82 (m, 3H); <sup>19</sup>F NMR (376.5 MHz, CDCl<sub>3</sub>)  $\delta$  -57.19 (s, 3F); <sup>13</sup>C NMR (100 MHz, CDCl<sub>3</sub>):  $\delta$  187.1, 185.0, 146.8, 144.0, 136.9, 136.5, 135.3, 131.2, 126.8, 126.6, 121.7, 120.7 (t,  $J_{C-F}$  = 258.5 Hz), 119.1. HRMS (ESI-microTOF-III): calcd. for C<sub>13</sub>H<sub>7</sub>F<sub>3</sub>O<sub>3</sub>Na 291.0239; found 291.0239.

#### Preparation of 2-(3,6-Dioxocyclohexa-1,4-dienyl)benzaldehyde (**3ag**):

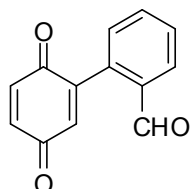

The reaction was carried out according to **general method A** using 1,4-Benzoquinone **1a** (100 mg, 0.925 mmol), 2-Formylphenylboronic acid **2g** (208.2 mg, 1.388 mmol), potassium persulfate (500.6 mg, 1.852 mmol), 4 mL of 1:1 v/v of DCE-water. Conditions: 80 °C, 30 min.

The title compound **3ag** (88.5 mg, 45% yield) was obtained as yellow semi solid after passing through a short silica gel column chromatography (hexane/ethyl acetate, 95:05). <sup>1</sup>H NMR (400 MHz, CDCl<sub>3</sub>):  $\delta$  9.93 (s, 1H), 7.93 (d,  $J$  = 6.4 Hz, 1H), 7.73-7.67 (m, 2H), 7.33 (d,  $J$  = 6.8 Hz, 1H), 6.92-6.86 (m, 2H), 6.71 (s, 1H); <sup>13</sup>C NMR (100 MHz, CDCl<sub>3</sub>):  $\delta$  191.6, 187.2, 185.3, 149.1, 137.1, 136.8, 134.9, 134.2, 133.7, 133.6, 132.0, 130.4, 130.2. HRMS (ESI-microTOF-III): calcd. for C<sub>13</sub>H<sub>8</sub>O<sub>3</sub>Na 235.0366; found 235.0864.

#### Preparation of 2-(4-Iodophenyl) cyclohexa-2,5-diene-1,4-dione (**3ah**):

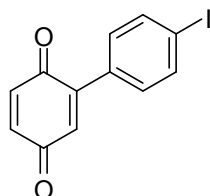

The reaction was carried out according to **general method A** using 1,4-benzoquinone **1a** (100 mg, 0.925 mmol), 4-iodophenylboronic acid **2h** (344.2 mg, 1.388 mmol), potassium persulfate (500.6 mg, 1.852 mmol), 4 mL of 1:1 v/v of DCE-water. Conditions: 80 °C, 15 min.

The title compound **3ah** (224 mg, 78% yield) was obtained as yellow solid after passing through a short silica gel column chromatography (hexane/ethyl acetate, 95:05). m.p.: 133-

135 °C. <sup>1</sup>H NMR (400 MHz, CDCl<sub>3</sub>): δ 7.80 (d, *J* = 8.4 Hz, 2H), 7.23 (d, *J* = 8.0 Hz, 2H), 6.89-6.82 (m, 3H); <sup>13</sup>C NMR (100 MHz, CDCl<sub>3</sub>): δ 187.2, 186.2, 145.0, 137.8, 137.0, 136.4, 132.6, 132.1, 130.8, 96.9. The spectral data of the compound **3ah** complies with the values reported in the literature.<sup>2</sup>

#### Preparation of 2-(4-Chlorophenyl) cyclohexa-2,5-diene-1,4-dione (**3ai**):

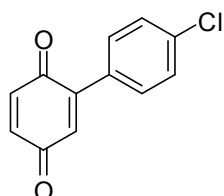

The reaction was carried out according to **general method A** using 1,4-benzoquinone **1a** (100 mg, 0.925 mmol), 4-chlorophenylboronic acid **2i** (217.2 mg, 1.388 mmol), potassium persulfate (500.6 mg, 1.852 mmol), 4 mL of 1:1 v/v of DCE-water. Conditions: 80 °C, 40 min.

The title compound **3ai** (71 mg, 35% yield) was obtained as yellow solid after passing through a short silica gel column chromatography (hexane/ethyl acetate, 95:05). m.p.: 134-137 °C. <sup>1</sup>H NMR (400 MHz, CDCl<sub>3</sub>): δ 7.43 (s, 5H), 6.88-6.82 (m, 3H); <sup>13</sup>C NMR (100 MHz, CDCl<sub>3</sub>): δ 187.3, 186.3, 144.8, 137.0, 136.6, 136.4, 132.7, 131.0, 130.6, 128.9. The spectral data of the compound **3ai** complies with the values reported in the previous literature.<sup>3</sup>

#### Preparation of 2-(4-Bromophenyl) cyclohexa-2,5-diene-1,4-dione (**3aj**):

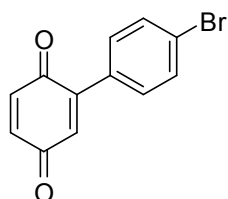

The reaction was carried out according to **general method A** using 1,4-benzoquinone **1a** (100 mg, 0.925 mmol), 4-bromophenylboronic acid **2j** (278.9 mg, 1.388 mmol), potassium persulfate (500.6 mg, 1.852 mmol), 4 mL of 1:1 v/v of DCE-water. Conditions: 80 °C, 25 min.

The title compound **3aj** (133.5 mg, 55% yield) was obtained as yellow solid after passing through a short silica gel column chromatography (hexane/ethyl acetate, 95:05). m.p.: 114-115 °C. <sup>1</sup>H NMR (400 MHz, CDCl<sub>3</sub>): δ 7.58 (d, *J* = 8.4 Hz, 2H), 7.36 (d, *J* = 8.4 Hz, 2H), 6.88-6.82 (m, 3H); <sup>13</sup>C NMR (100 MHz, CDCl<sub>3</sub>): δ 187.3, 186.2, 144.9, 137.0, 136.4, 132.7,





The reaction was carried out according to **general method A** using 3,5-dimethoxy-1,4-benzoquinone **1c** (100 mg, 0.595 mmol), phenylboronic acid **2a** (0.893 mmol, 109 mg), potassium persulfate (322 mg, 1.190 mmol), 4 mL of 1:1 v/v of DCE-water. Conditions: 80 °C, 3h 20 min.

The title compound **3cl** (99 mg, 68% yield) was obtained as orange solid after passing through a short silica gel column chromatography (hexane/ethyl acetate, 95:05). m.p.: 112-114 °C. <sup>1</sup>H NMR (400 MHz, CDCl<sub>3</sub>): δ 7.44-7.37 (m, 3H), 7.30-7.28 (m, 2H), 5.96 (s, 1H), 3.85 (s, 3H), 3.75 (s, 3H); <sup>13</sup>C NMR (100 MHz, CDCl<sub>3</sub>): δ 186.6, 178.6, 157.3, 153.9, 130.6, 130.1, 130.1, 129.3, 128.8, 127.8, 107.2, 61.2, 56.5. The spectral data of the compound **3cl** was complies with the values reported in the literature.<sup>1</sup>

### Preparation of 3,5-Dimethoxy-2-(4-methoxyphenyl) cyclohexa-2,5-diene-1,4-dione (**3cm**):

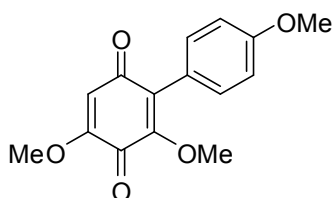

The reaction was carried out according to **general method A** using 3,5-dimethoxy-1,4-benzoquinone **1c** (100 mg, 0.595 mmol), 4-Methoxyphenylboronic acid **2b** (136 mg, 0.893 mmol), Potassium persulfate (322 mg, 1.190 mmol), 4 mL of 1:1 v/v of DCE-water. Conditions: 80 °C, 2h 30 min.

The title compound **3cm** (121 mg, 74% yield) was obtained as dark red solid after passing through a short silica gel column chromatography (hexane/ethyl acetate, 95:05). m.p.: 170-171 °C. <sup>1</sup>H NMR (400 MHz, CDCl<sub>3</sub>): δ 7.27 (d, *J* = 8.4 Hz, 2H), 6.94 (d, *J* = 8.4 Hz, 2H), 5.94 (s, 1H), 3.84 (s, 6H), 3.75 (s, 3H); <sup>13</sup>C NMR (100 MHz, CDCl<sub>3</sub>): δ 187.0, 178.6, 160.1, 157.4, 153.7, 132.2, 129.4, 122.1, 113.5, 107.2, 61.1, 56.5, 55.3. HRMS (ESI-microTOF-III): calcd. for C<sub>15</sub>H<sub>14</sub>O<sub>5</sub>Na 297.0733; found 297.0733.

### Preparation of 2-(4-Iodophenyl)-3,5-dimethoxycyclohexa-2,5-diene-1,4-dione (**3cn**):

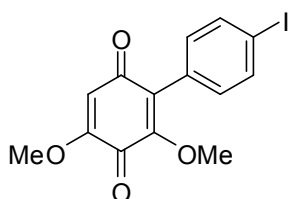

The reaction was carried out according to **general method A** using 3,5-dimethoxy -1,4-benzoquinone **1c** (100 mg, 0.595 mmol), 4-iodophenylboronic acid **2h** (221.3 mg, 0.893 mmol), potassium persulfate (322 mg, 1.190 mmol), 4 mL of 1:1 v/v of DCE-water. Conditions: 80 °C, 50 min.

The title compound **3cn** (167.5 mg, 76% yield) was obtained as light orange solid after passing through a short silica gel column chromatography (hexane/ethyl acetate, 95:05).

m.p.: 206 °C. <sup>1</sup>H NMR (400 MHz, CDCl<sub>3</sub>): δ 7.75 (d, *J* = 7.6 Hz, 2H), 7.04 (d, *J* = 8.0 Hz, 2H), 5.95 (s, 1H), 3.85 (s, 3H), 3.81 (s, 3H); <sup>13</sup>C NMR (100 MHz, CDCl<sub>3</sub>): δ 186.2, 178.4, 157.4, 153.9, 137.1, 132.4, 129.5, 128.4, 107.1, 95.2, 61.4, 56.5. HRMS (ESI-microTOF-III): calcd. for C<sub>13</sub>H<sub>11</sub>IO<sub>4</sub>Na 292.9594; found 292.9594.

#### Preparation of 2-(4-Bromophenyl)-3,5-dimethoxycyclohexa-2,5-diene-1,4-dione (**3co**):

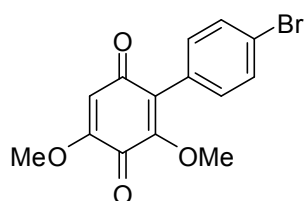

The reaction was carried out according to **general method A** using 3,5-dimethoxy -1,4-benzoquinone **1c** (100 mg, 0.595 mmol), 4-bromophenylboronic acid **2o** (179.3 mg, 0.893 mmol), potassium persulfate (322 mg, 1.190 mmol), 4 mL of 1:1 v/v of DCE-water. Conditions: 80 °C, 1h 40 min.

The title compound **3co** (126.5 mg, 66% yield) was obtained as light orange solid after passing through a short silica gel column chromatography (hexane/ethyl acetate, 95:05). m.p.: 202 °C. <sup>1</sup>H NMR (400 MHz, CDCl<sub>3</sub>): δ 7.55 (d, *J* = 7.6 Hz, 2H), 7.18 (d, *J* = 7.2 Hz, 2H), 3.85 (s, 3H), 3.81 (s, 3H); <sup>13</sup>C NMR (100 MHz, CDCl<sub>3</sub>): δ 186.2, 178.3, 157.4, 153.9, 132.3, 131.1, 128.9, 129.3, 123.2, 107.1, 61.3, 61.5. HRMS (ESI-microTOF-III): calcd. for C<sub>13</sub>H<sub>8</sub>O<sub>3</sub>Na 344.9733; found 377.9733.

#### Preparation of 4'-methoxy-4,6-dimethyl-[1,1'-biphenyl]-2,5-dione (**3dp**):

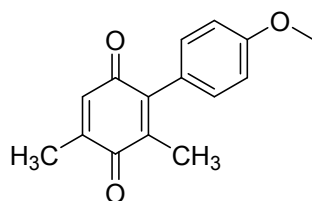

The reaction was carried out according to **general method A** using 2,6-dimethyl -1,4-benzoquinone **1d** (100 mg, 0.734 mmol), 4-methoxyphenylboronic acid **2a** (167.4 mg, 1.10 mmol), potassium persulfate (397 mg, 1.47 mmol), 4 mL of 1:1 v/v of DCE-water. Conditions: 80 °C, 24 h.

The title compound **3dp** (50 mg, 28% yield) was obtained as light yellow orange solid after passing through a short silica gel column chromatography (hexane/ethyl acetate, 95:05). m.p.: 86-88 °C. <sup>1</sup>H NMR (400 MHz, CDCl<sub>3</sub>): δ 7.10 (d, *J* = 8.4 Hz, 2H), 6.95 (d, *J* = 8.4 Hz, 2H), 6.64 (s, 1H), 3.84 (s, 3H), 2.10 (s, 3H), 1.10 (s, 3H); <sup>13</sup>C NMR (100 MHz, CDCl<sub>3</sub>): δ 188.6, 186.9, 159.8, 145.5, 143.3, 141.2, 133.2, 131.1, 125.1, 113.6, 15.8, 14.1. HRMS (ESI-microTOF-III): calcd. for C<sub>15</sub>H<sub>14</sub>O<sub>3</sub>(M+H)<sup>+</sup> 243.1016; found 243.1014.

#### Preparation of 4'-(tert-butyl)-4,6-dimethyl-[1,1'-biphenyl]-2,5-dione (**3dq**):

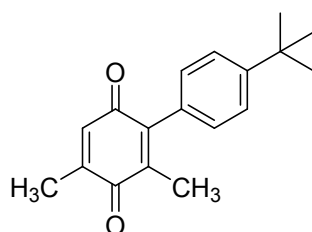

The reaction was carried out according to **general method A** using 2,6-dimethyl -1,4-benzoquinone **1d** (100 mg, 0.734 mmol), 4-tert-butylphenylboronic acid **2d** (196.1 mg, 1.10 mmol), potassium persulfate (397 mg, 1.47 mmol), 4 mL of 1:1 v/v of DCE-water. Conditions: 80 °C, 24 h.

The title compound **3dq** (50 mg, 28% yield) was obtained as inseparable mixture of light yellow oil after passing through a short silica gel column chromatography in hexane alone. <sup>1</sup>H NMR (400 MHz, CDCl<sub>3</sub>): δ 7.44 (d, *J* = 8.4 Hz, 2H), 7.10 (d, *J* = 8.0 Hz, 2H), 6.66 (s, 1H), 2.11 (s, 3H), 1.99 (s, 3H), 1.36 (s, 9H); <sup>13</sup>C NMR (100 MHz, CDCl<sub>3</sub>): δ 188.6, 188.1, 187.5, 186.8, 151.4, 145.8, 145.4, 143.6, 141.4, 133.3, 133.2, 129.9, 129.3, 125.0, 34.7, 34.2, 15.9, 15.8, 14.1. HRMS (ESI-microTOF-III): calcd. for C<sub>18</sub>H<sub>20</sub>O<sub>2</sub>(M+H)<sup>+</sup> 269.1536; found 269.1529.

#### Preparation of 2,5-Dichloro-3-phenylcyclohexa-2,5-diene-1,4-dione (**3er**):

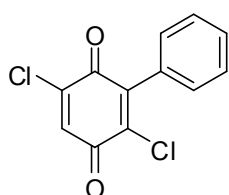

The reaction was carried out according to **general method A** using 2,5-dichloro -1,4-benzoquinone **1e** (100 mg, 0.397 mmol), phenylboronic acid **2a** (72.6 mg, 0.595 mmol), potassium persulfate (214.6 mg, 0.793 mmol), 4 mL of 1:1 v/v of DCE-water. Conditions: 80 °C, 1h 30 min.

The title compound **3er** (29 mg, 20% yield) was obtained as yellow solid after passing through a short silica gel column chromatography (hexane/ethyl acetate, 95:05). m.p.: 102-105°C. <sup>1</sup>H NMR (400 MHz, CDCl<sub>3</sub>): δ 7.49-7.47 (m, 3H), 7.31-7.28 (m, 2H), 7.23 (s, 1H); <sup>13</sup>C NMR (100 MHz, CDCl<sub>3</sub>): δ 177.6, 177.0, 144.5, 143.8, 141.0, 133.0, 130.7, 129.9, 129.6, 128.3. The spectral data of the compound **3er** was complies with the values reported in the literature.<sup>1</sup>

#### Preparation of 2-phenylnaphthalene-1,4-dione (**5a**):

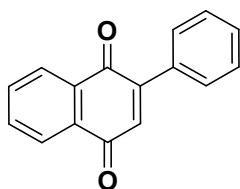

The reaction was carried out according to **general method B** using 1,4-naphthoquinone **4a** (100 mg, 0.632 mmol), phenylboronic acid **2a** (116 mg, 0.949 mmol), potassium persulfate (342 mg, 1.265 mmol), triethylamine (0.9 mL, 6.322 mmol), 4 mL of 1:1 v/v of DCE-water. Conditions: 80 °C, 8h.

The title compound **5a** (21 mg, 14% yield) was obtained as yellow solid after passing through a short silica gel column chromatography (hexane/ethyl acetate, 95:05). m.p.: 106-109 °C. <sup>1</sup>H NMR (400 MHz, CDCl<sub>3</sub>): δ 8.20-8.12 (m, 1H), 8.14-8.12 (m, 1H), 7.79-7.77 (m, 2H), 7.59-7.57 (m, 2H), 7.48 (t, *J* = 2.4, 3H), 7.10 (s, 1H); <sup>13</sup>C NMR (100 MHz, CDCl<sub>3</sub>): δ 185.2, 184.4, 148.2, 135.2, 133.9, 133.8, 133.4, 132.5, 132.1, 130.0, 129.4, 128.5, 127.1, 126.0. The spectral data of the compound **5a** was complies with the values reported in the literature.<sup>5</sup>

#### Preparation of 2-(4-methoxyphenyl)naphthalene-1,4-dione (**5b**):

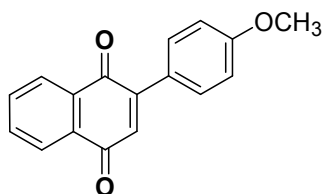

The reaction was carried out according to **general method B** using 1,4-naphthoquinone **4a** (100 mg, 0.632 mmol), 4-methoxyphenylboronic acid **2b** (116 mg, 0.949 mmol), potassium persulfate (342 mg, 1.265 mmol), triethylamine (0.9 mL, 6.322 mmol), 4 mL of 1:1 v/v of DCE-water. Conditions: 80 °C, 7h 30 min.

The title compound **5b** (65 mg, 14% yield) was obtained as yellow solid after passing through a short silica gel column chromatography (hexane/ethyl acetate, 95:05). m.p.: 131-133 °C. <sup>1</sup>H NMR (400 MHz, CDCl<sub>3</sub>): δ 8.17-8.08 (m, 2H), 7.75 (t, 2H), 7.79 (m, 2H), 7.57 (t, *J* = 8, 2H), 7.03 (s, 1H), 6.98 (d, *J* = 8, 2H); <sup>13</sup>C NMR (100 MHz, CDCl<sub>3</sub>): δ 185.3, 184.9, 161.45, 147.5, 133.8, 133.8, 132.7, 132.3, 131.2, 127.1, 126.0, 125.8, 114.2, 55.5. The spectral data of the compound **3w** complies with the values reported in the literature.<sup>5</sup>

#### Preparation of 2-(3-methoxyphenyl)naphthalene-1,4-dione (**5c**):

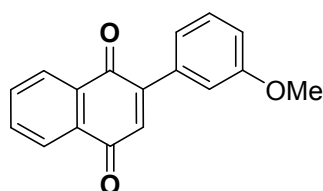

The reaction was carried out according to **general method B** using 1,4-naphthoquinone **4a** (100 mg, 0.632 mmol), 3-methoxyphenylboronic acid **2i** (116 mg, 0.949 mmol), potassium persulfate (342 mg, 1.265 mmol), Triethylamine (0.9 mL, 6.322 mmol), 4 mL of 1:1 v/v of DCE-water. Conditions: 80 °C, 7h 30 min.

The title compound **5c** (65 mg, 14% yield) was obtained as yellow solid after passing through a short silica gel column chromatography (hexane/ethyl acetate, 95:05). m.p.: 130-132 °C. <sup>1</sup>H NMR (400 MHz, CDCl<sub>3</sub>): δ 8.18-8.11 (m, 2H), 7.77 (d, *J* = 2.8, 2H), 7.38 (t, *J* = 8.0, 1H), 7.15 (d, *J* = 7.2, 1H), 7.10 (d, *J* = 15.6, 2H), 7.02 (d, *J* = 7.6, 1H); <sup>13</sup>C NMR (100 MHz, CDCl<sub>3</sub>): δ 185.1, 184.3, 159.5, 148.0, 135.3, 134.7, 133.8, 133.77, 132.5, 132.1, 129.5, 127.0, 125.96, 121.8, 115.9, 114.9, 55.4. HRMS (ESI-microTOF-III): calcd. for C<sub>18</sub>H<sub>14</sub>O<sub>4</sub>(M+H)<sup>+</sup> 295.0965; found 265.0964.

#### Preparation of 2-Hydroxy-3-phenylnaphthalene-1,4-dione (**5d**):

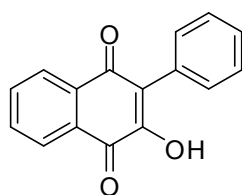

The reaction was carried out according to **general method B** using 2-hydroxy-1,4-naphthoquinone **4b** (100 mg, 0.575 mmol), phenylboronic acid **2a** (105.1 mg, 0.862 mmol), potassium persulfate (310 mg, 1.150 mmol), triethylamine (0.6 mL, 5.742 mmol), 4 mL of 1:1 v/v of DCE-water. Conditions: 80 °C, 6h.

The title compound **5d** (65 mg, 45% yield) was obtained as dark yellow solid after passing through a short silica gel column chromatography (hexane/ethyl acetate, 95:05). m.p.: 141-143 °C. <sup>1</sup>H NMR (400 MHz, CDCl<sub>3</sub>): δ 8.21 (d, *J* = 7.6 Hz, 1H), 8.16 (d, *J* = 7.6 Hz, 1H), 7.82 (t, *J* = 7.2 Hz, 1H), 7.74 (t, *J* = 7.6 Hz, 1H), 7.58 (s, 1H), 7.52 (d, *J* = 8.0 Hz, 2H), 7.47 (t, *J* = 7.6 Hz, 2H), 7.45-7.40 (m, 1H); <sup>13</sup>C NMR (100 MHz, CDCl<sub>3</sub>): δ 183.7, 181.9, 152.2, 135.3, 133.1, 132.9, 130.7, 130.0, 129.4, 128.7, 127.9, 127.3, 126.1, 122.2. The spectral data of the compound **3y** was complies with the values reported in the literature.<sup>4</sup>

#### Preparation of 2-methoxy-3-phenylnaphthalene-1,4-dione (**5e**)

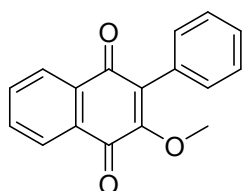

The reaction was carried out according to **general method B** using 2-methoxy-1,4-naphthoquinone **4c** (100 mg, 0.531 mmol), phenylboronic acid **2a** (97.2 mg, 0.797 mmol), potassium persulfate (287 mg, 1.063 mmol), triethylamine (0.7 mL, 5.314 mmol), 4 mL of 1:1 v/v of DCE-water. Conditions: 80 °C, 24h.

The title compound **5e** was obtained in trace as yellow semi solid after passing through a short silica gel column chromatography (hexane/ethyl acetate, 95:05). <sup>1</sup>H NMR (400 MHz, CDCl<sub>3</sub>): δ 8.14-8.12 (m, 2H), 7.76-7.73 (m, 2H), 7.45-7.41 (m, 3H), 7.37-7.35 (m, 2H), 3.88 (s, 3H); <sup>13</sup>C NMR (100 MHz, CDCl<sub>3</sub>): δ 184.9, 182.1, 157.2, 134.3, 133.6, 132.1, 131.0, 130.6, 129.8, 128.8, 128.0, 126.8, 126.3, 115.4, 61.6. HRMS (ESI-microTOF-III): calcd. for C<sub>17</sub>H<sub>12</sub>O<sub>3</sub>(M+H)<sup>+</sup> 265.0859; found 265.0860

#### Preparation of 2-methoxy-3-(4-methoxyphenyl)naphthalene-1,4-dione (**5f**)

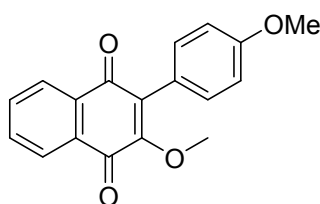

The reaction was carried out according to **general method B** using 2-methoxy-1,4-naphthoquinone **4c** (100 mg, 0.531 mmol), 4-methoxy phenylboronic acid **2b** (121 mg, 0.797 mmol), potassium persulfate (287 mg, 1.063 mmol), triethylamine (0.7 mL, 5.314 mmol), 4 mL of 1:1 v/v of DCE-water. Conditions: 80 °C, 24h.

The title compound **5f** (24mg, 15% yield) was obtained as dark red solid after passing through a short silica gel column chromatography (hexane/ethyl acetate, 95:05). m.p.: 192-194 °C. <sup>1</sup>H NMR (400 MHz, CDCl<sub>3</sub>): δ 8.13-8.11 (m, 2H), 7.74-7.72 (m, 2H), 7.35-7.33 (m, 2H), 6.99-6.97 (m, 2H), 3.88 (s, 3H), 3.86 (s, 3H); <sup>13</sup>C NMR (100 MHz, CDCl<sub>3</sub>): δ 185.2, 182.1, 160.0, 157.1, 134.2, 133.5, 132.2, 132.1, 131.6, 131.6, 126.8, 126.3, 122.9, 113.6, 61.5, 55.43. HRMS (ESI-micrOTOF-III): calcd. for C<sub>18</sub> H<sub>14</sub>O<sub>4</sub>(M+H)<sup>+</sup> 295.0965; found 265.0964.

#### Preparation of 2-Phenylpyridine (7a):

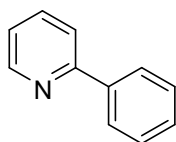

The reaction was carried out according to **general method C** using pyridine **6a** (100 mg, 1.266 mmol), phenylboronic acid **2a** (231.5 mg, 1.90 mmol), potassium persulfate (684 mg, 2.532 mmol), 4 mL of 1:1 v/v of DCE-water. Conditions: 80 °C, 5 min.

The title compound **7a** (in trace) was obtained as oil after passing through a short silica gel column chromatography (hexane/ethyl acetate, 95:05). <sup>1</sup>H NMR (400 MHz, CDCl<sub>3</sub>): δ 8.71 (d, *J* = 4.4 Hz, 1H), 8.40 (d, *J* = 7.6 Hz, 2H), 7.80-7.73 (m, 2H), 7.49 (t, *J* = 7.6 Hz, 2H), 7.44-7.41 (m, 1H), 7.26-7.24 (m, 1H); <sup>13</sup>C NMR (100 MHz, CDCl<sub>3</sub>): δ 157.3, 149.3, 139.0, 137.2, 129.2, 128.8, 127.0, 122.2, 120.8, 29.7. The spectral data of the compound **7a** was complies with the values reported in the literature.<sup>3</sup>

#### Preparation of 1-(2-phenylpyridin-4-yl) ethanone (7b):

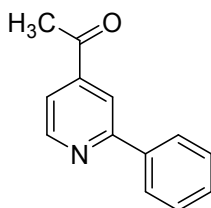

The reaction was carried out according to **general method C** using 4-acetylpyridine **6b** (100 mg, 0.510 mmol), phenylboronic acid **2a** (93 mg, 0.761 mmol), potassium persulfate (505 mg, 1.870 mmol), 4 mL of 1:1 v/v of DCE-water. Conditions: 80 °C, 10 min.

The title compound **7b** (in trace) was obtained as pale light yellow solid after passing through a short silica gel column chromatography (hexane/ethyl acetate, 95:05). m.p.: 108 °C. <sup>1</sup>H NMR (400 MHz, CDCl<sub>3</sub>): δ 8.87 (d, *J*=4.8, 1H), 8.17 (s, 1H), 8.04 (d, *J* = 7.2 Hz, 2H), 7.65 (d, *J* = 4.0 Hz, 1H), 7.52-7.43 (m, 3H); <sup>13</sup>C NMR (100 MHz, CDCl<sub>3</sub>): δ 197.5, 158.9, 150.8, 143.8, 138.6, 129.5, 128.9, 127.0, 119.7, 118.0, 26.8. The spectral data of the compound **7b** was complies with the values reported in the literature.<sup>3</sup>

#### Preparation of 2-Phenylquinoline (7c):

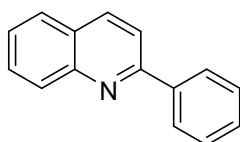

The reaction was carried out according to **general method C** using quinoline **6c** (100 mg, 0.775 mmol), phenylboronic acid **2a** (142 mg, 1.163 mmol), potassium persulfate (419 mg, 1.550 mmol), 4 mL of 1:1 v/v of DCE-water. Conditions: 80 °C, 5 min.

The title compound **7c** (67 mg, 42% yield) was obtained as pale yellow solid after passing through a short silica gel column chromatography (hexane/ethyl acetate, 95:05). <sup>1</sup>H NMR (400 MHz, CDCl<sub>3</sub>): δ 8.25-8.21 (m, 1H), 8.17 (d, *J*=8.0 Hz, 3H), 7.86 (d, *J* = 8.4 Hz, 1H), 7.84 (d, *J* = 8.0 Hz, 1H), 7.74 (t, *J* = 7.6 Hz, 1H), 7.54 (t, *J* = 7.6 Hz, 3H), 7.49-7.45 (m, 1H); <sup>13</sup>C NMR (100 MHz, CDCl<sub>3</sub>): δ 157.3, 148.1, 139.4, 137.0, 129.8, 129.6, 129.4, 128.9, 127.7, 127.5, 127.2, 126.4, 119.1. The spectral data of the compound **7c** was complies with the values reported in the literature.<sup>3</sup>

#### Preparation of 6-phenyl-2,2'-bipyridine (7d):

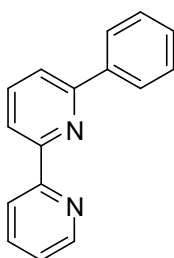



The reaction was carried out according to **general method C** using 2,2'-bipyridine **6d** (100 mg, 0.640 mmol), phenylboronic acid **2a** (117 mg, 0.961 mmol), potassium persulfate (346 mg, 1.281 mmol), 4 mL of 1:1 v/v of DCE-water. Conditions: 80 °C, 10 min.

The title compound **7d** (67 mg, 42% yield) was obtained as pale yellow solid after passing through a short silica gel column chromatography (hexane/ethyl acetate, 95:05).m.p.: 74-77 °C. <sup>1</sup>H NMR (400 MHz, CDCl<sub>3</sub>): δ 8.71 (d, *J* = 4.8 Hz, 1H), 8.65 (d, *J* = 8.0 Hz, 1H), 8.40 (d, *J* = 7.6 Hz, 1H), 8.16 (d, *J* = 7.2 Hz, 2H), 7.92-7.84 (m, 2H), 7.78 (d, *J* = 7.6 Hz, 1H), 7.53-7.50 (m, 2H), 7.46-7.42 (m, 1H), 7.35-7.32 (m, 1H); <sup>13</sup>C NMR (100 MHz, CDCl<sub>3</sub>): δ 156.5, 156.2, 155.5, 148.8, 139.4, 137.7, 137.1, 129.0, 128.7, 127.0, 123.8, 121.5, 120.4, 119.4. HRMS (ESI-microTOF-III): calcd. for C<sub>13</sub>H<sub>8</sub>O<sub>3</sub>Na 232.1000; found 232.1000.

7.492  
7.483  
7.478  
7.472  
7.462  
7.457  
7.453  
7.448  
7.442  
7.431  
7.260  
6.926  
6.889  
6.874  
6.868  
6.864  
6.847  
6.842  
6.822  
6.816  
6.784

AP034-2-BQPH  
26-03.3.14

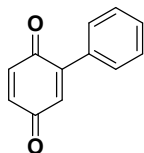

3aa

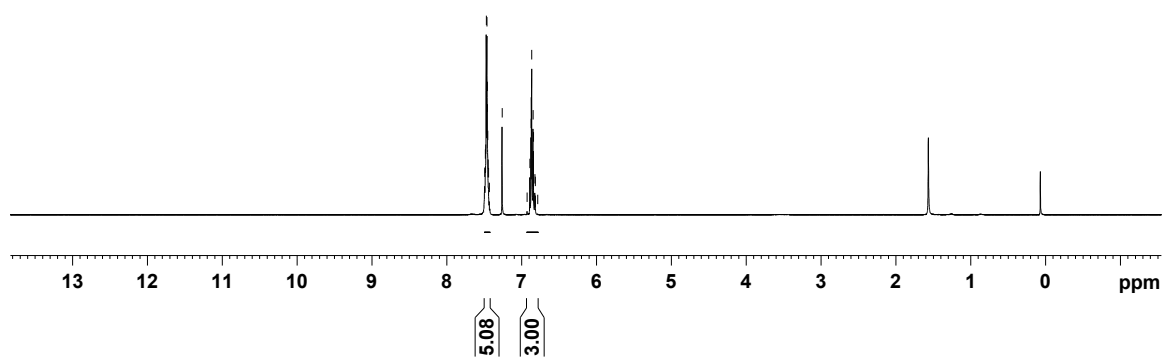

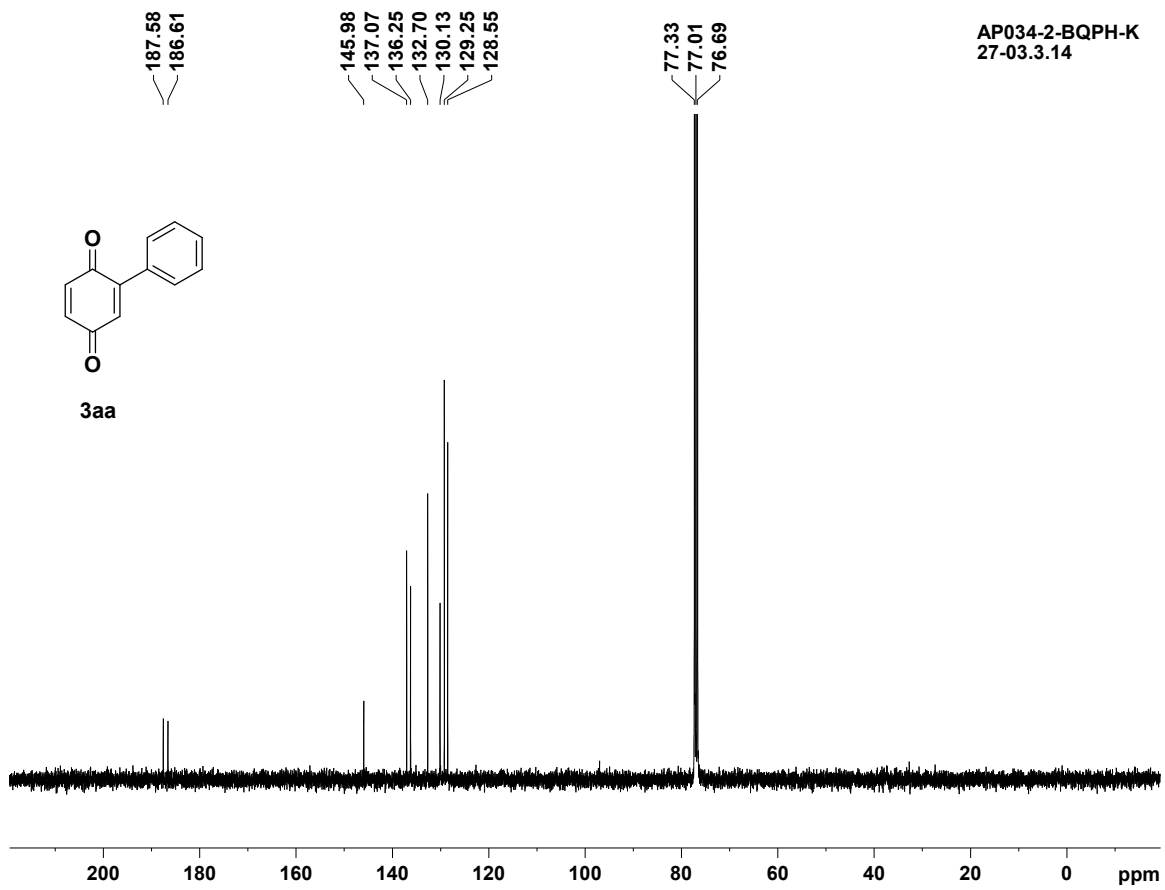

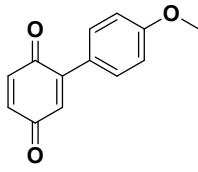

3ab

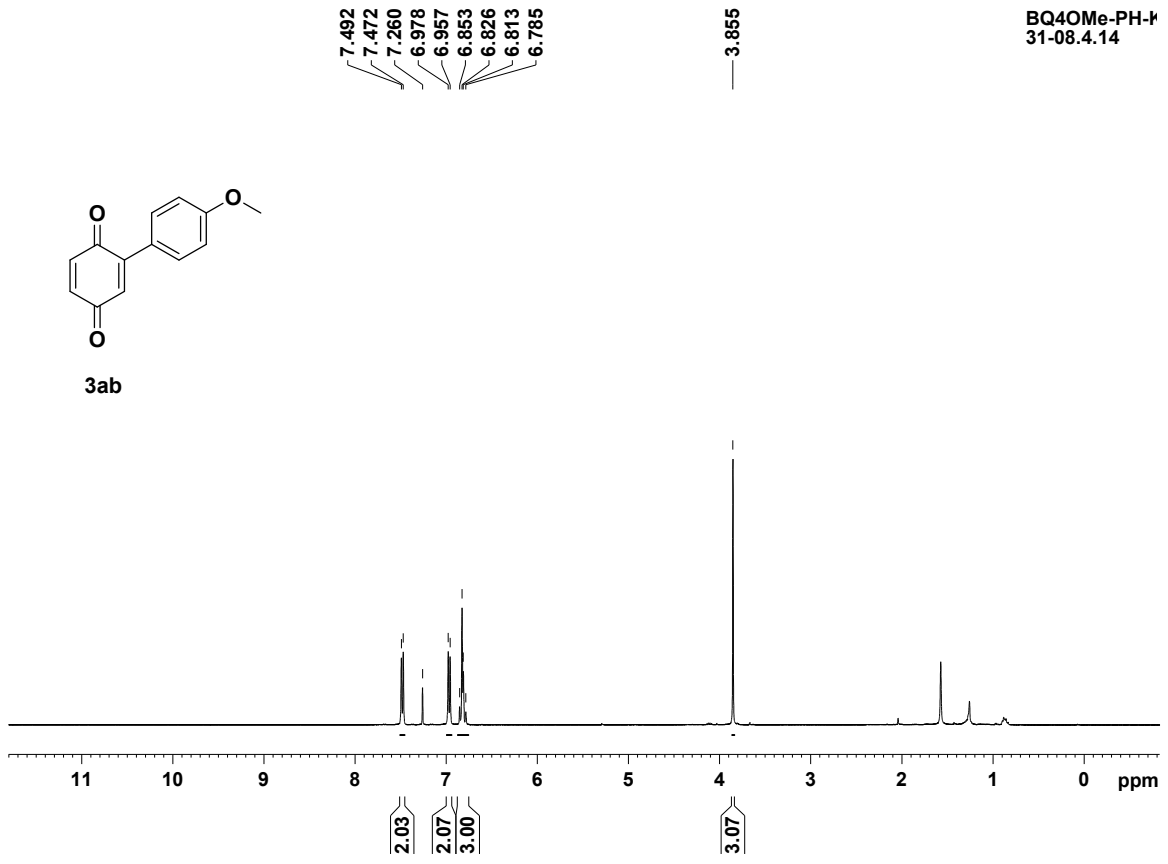

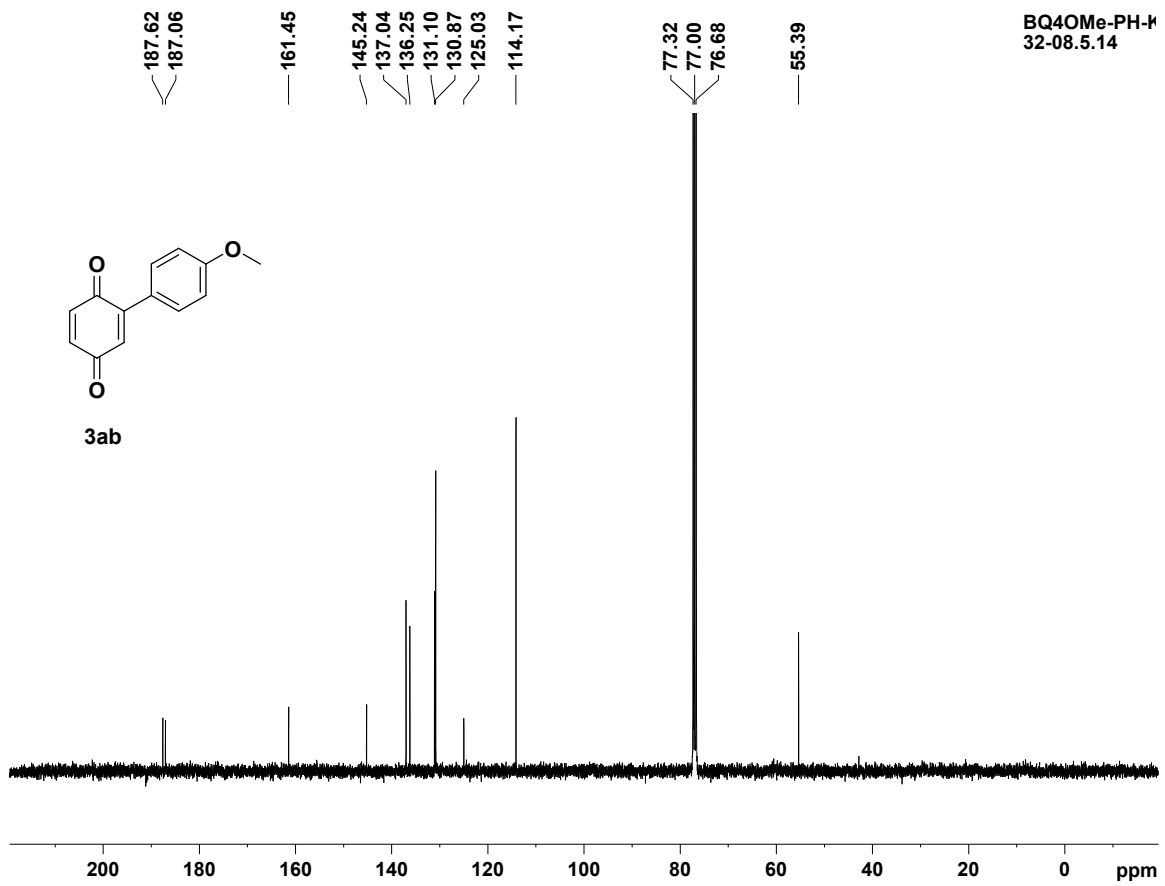

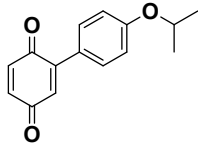

3ac

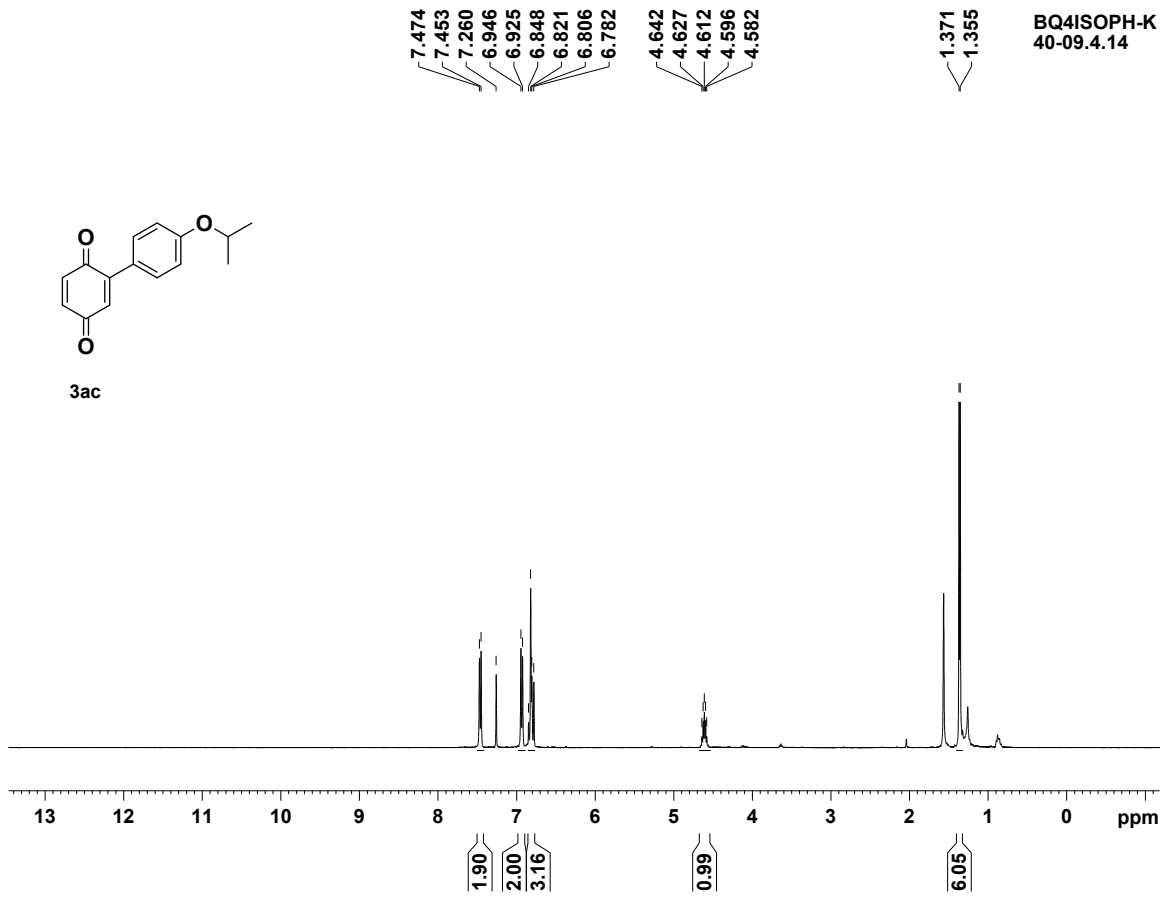

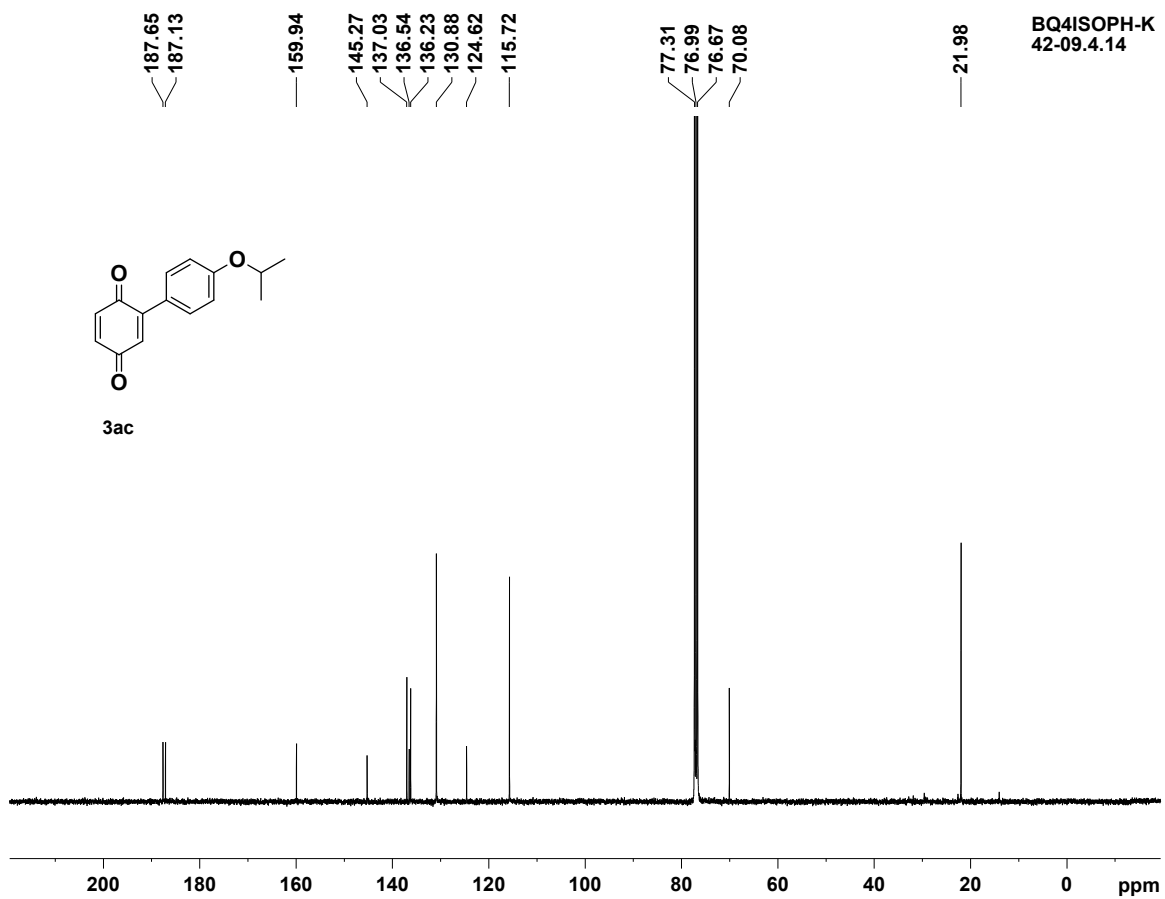

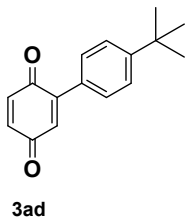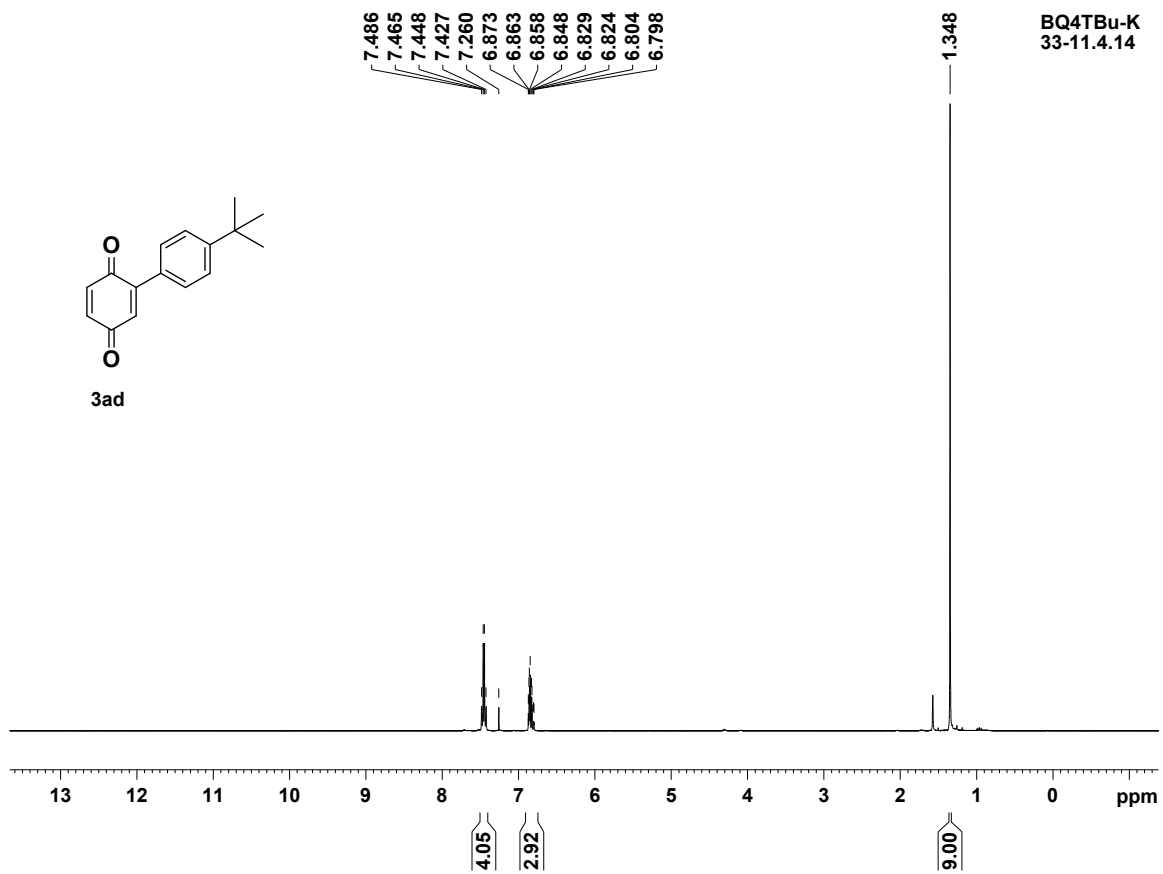



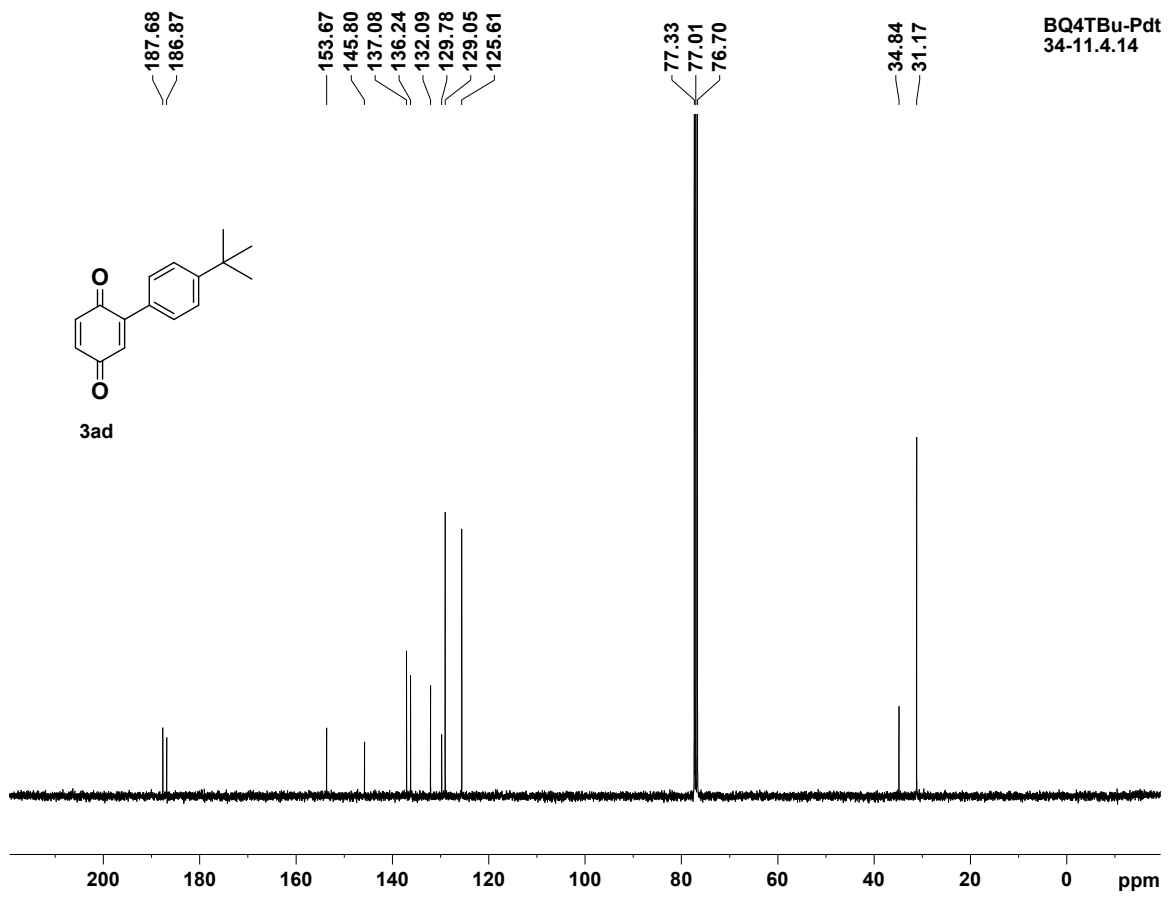

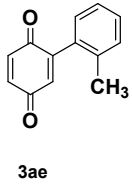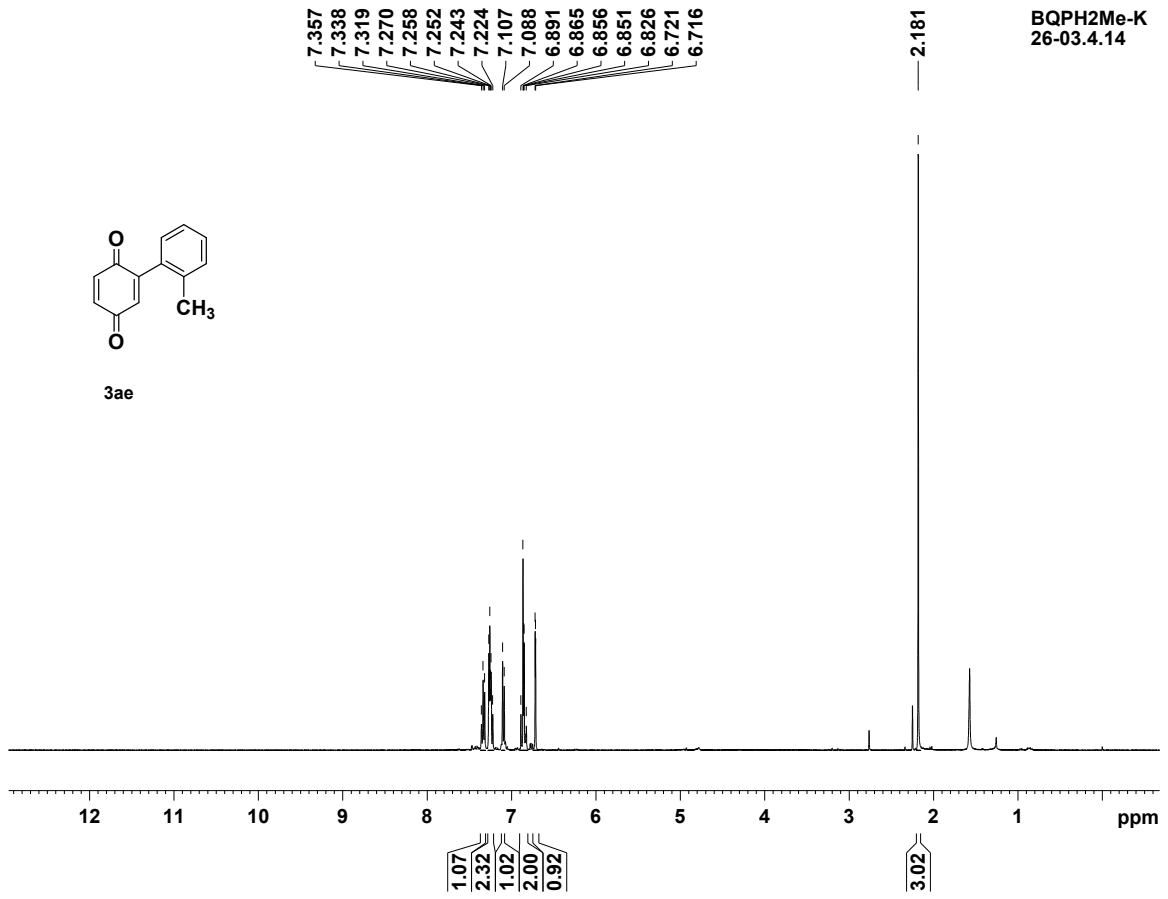

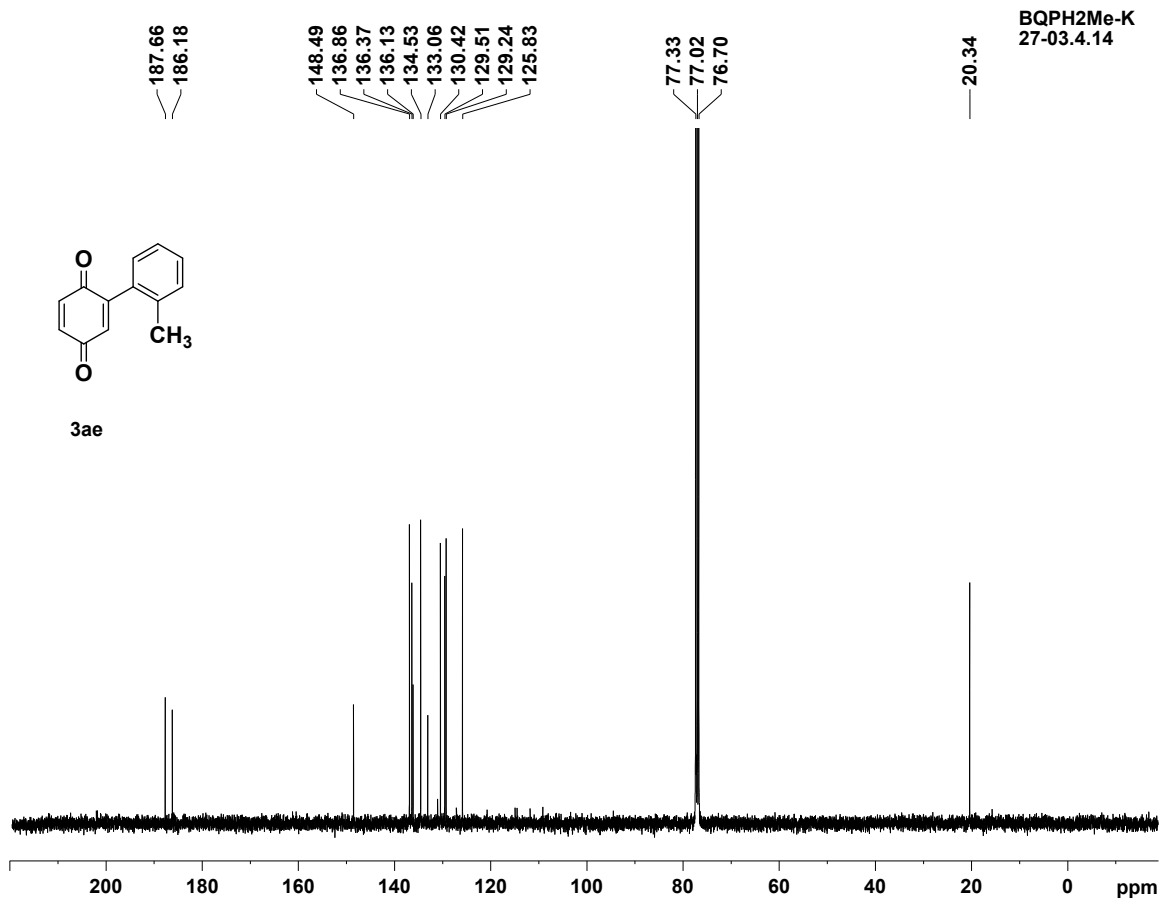

7.518  
7.513  
7.498  
7.494  
7.478  
7.474  
7.386  
7.367  
7.348  
7.343  
7.297  
7.293  
7.278  
7.274  
7.260  
6.912  
6.887  
6.870  
6.865  
6.845  
6.839  
6.822  
6.816

BQ2OCF3PHK  
41-11.4.14

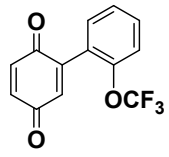

3af

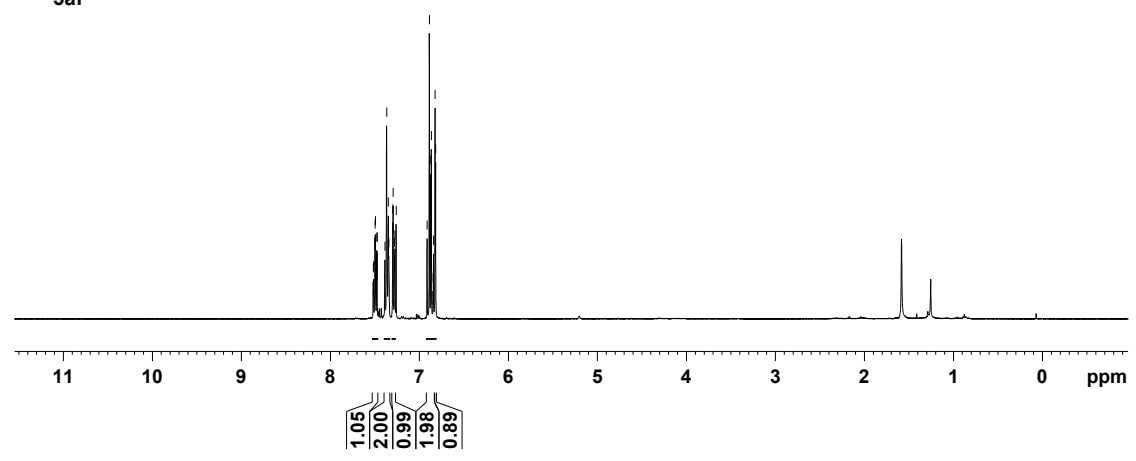

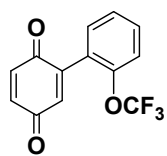

3af

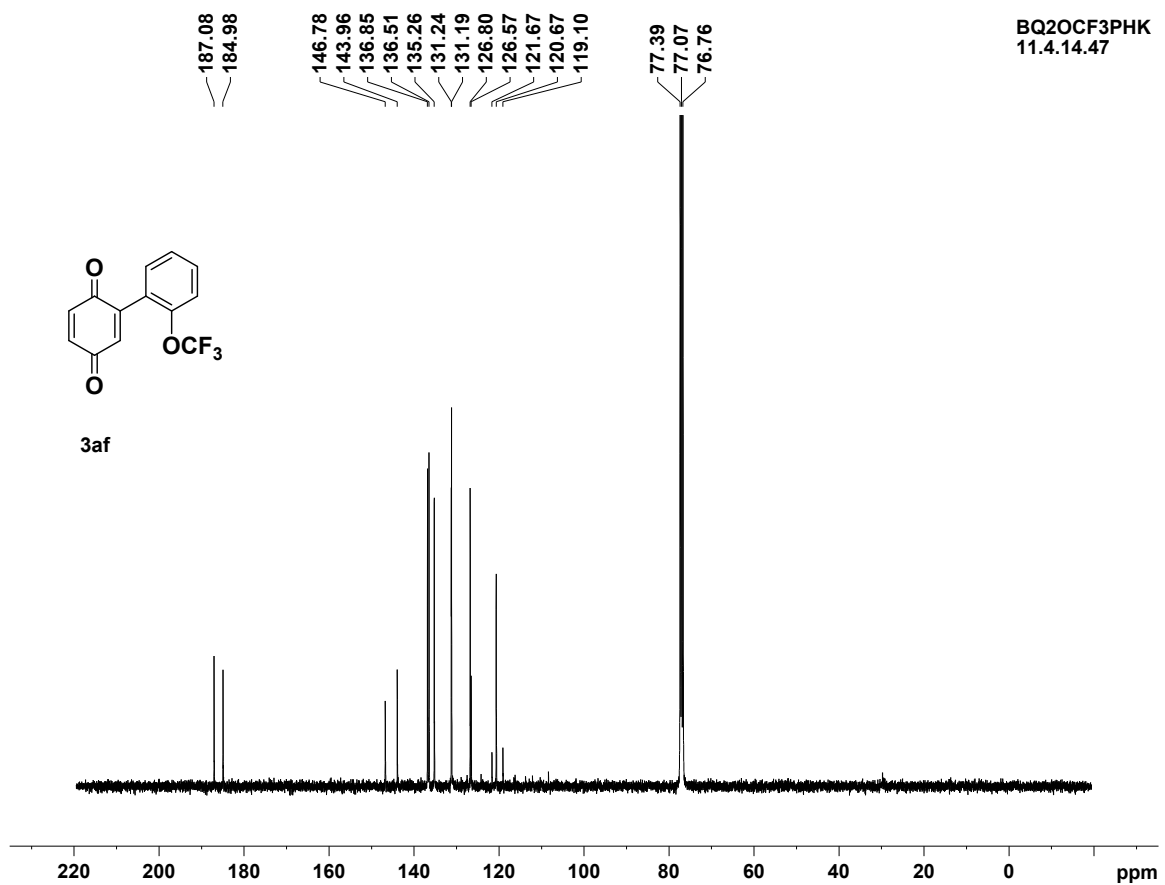

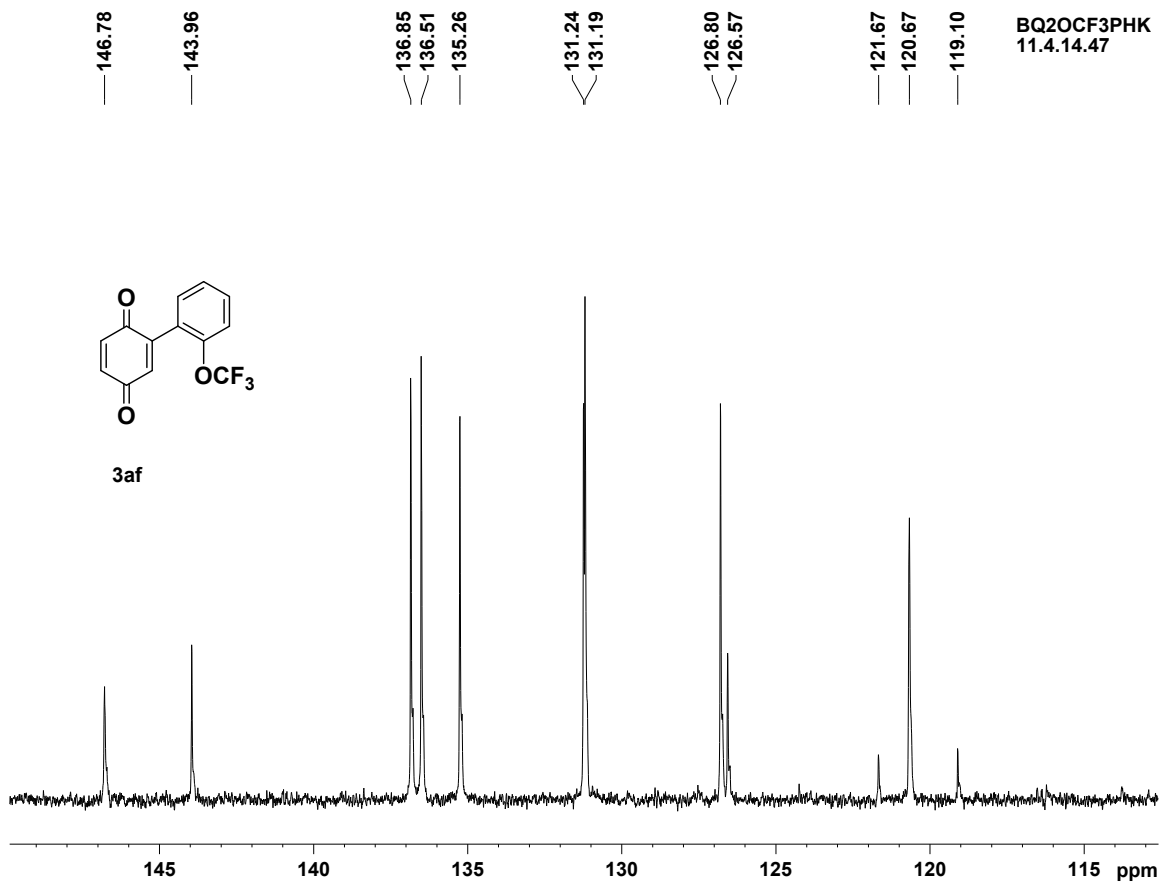

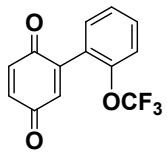

3af

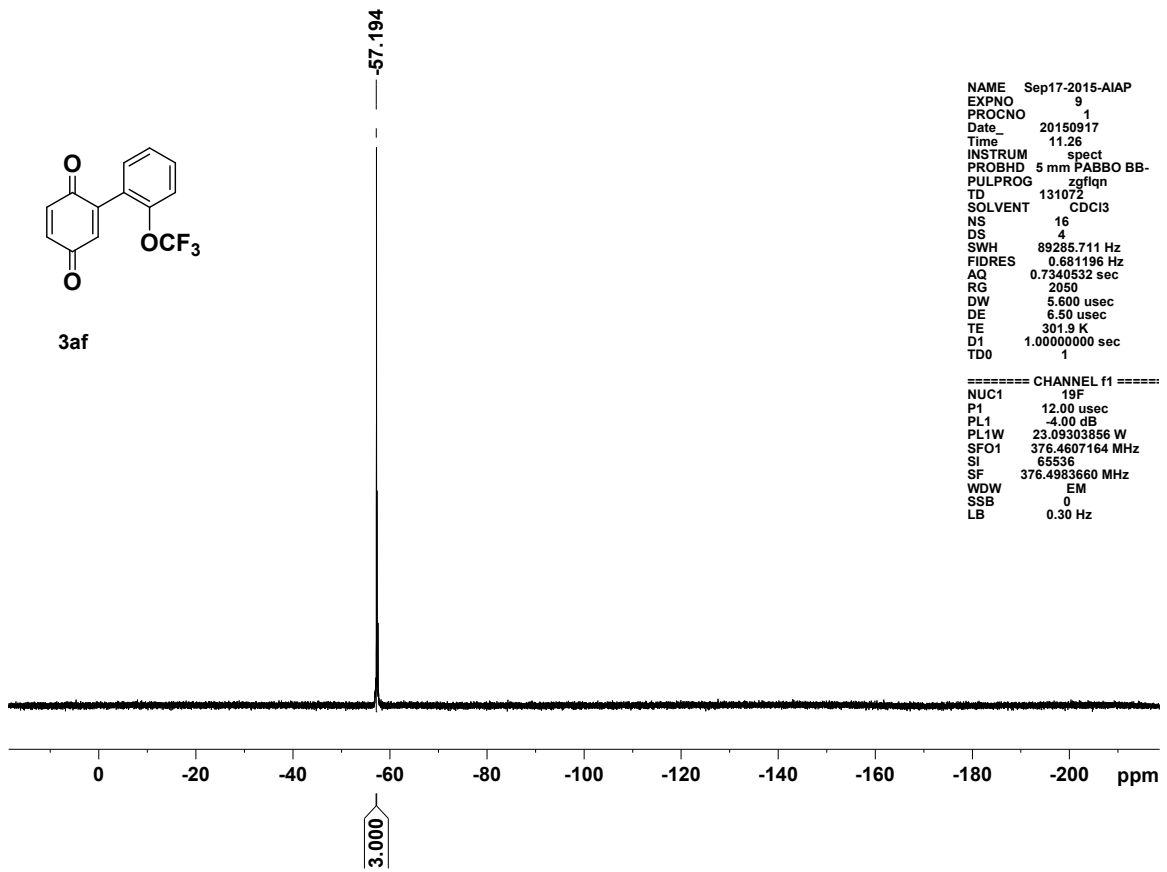

NAME Sep17-2015-AIAP  
EXPNO 9  
PROCNO 1  
Date\_ 20150917  
Time 11.26  
INSTRUM spect  
PROBHD 5 mm PABBO BB-  
PULPROG zgpg30  
TD 131072  
SOLVENT CDCl3  
NS 16  
DS 4  
SWH 89285.711 Hz  
FIDRES 0.681196 Hz  
AQ 0.7340532 sec  
RG 2050  
DW 5.600 usec  
DE 6.50 usec  
TE 301.9 K  
D1 1.00000000 sec  
TD0 1

==== CHANNEL f1 =====  
NUC1 19F  
P1 12.00 usec  
PL1 -4.00 dB  
PL1W 23.09303856 W  
SFO1 376.4607164 MHz  
SI 65536  
SF 376.4983680 MHz  
WDW EM  
SSB 0  
LB 0.30 Hz

bQ-2AldePBA-K-ksks  
4-02.4.13

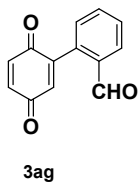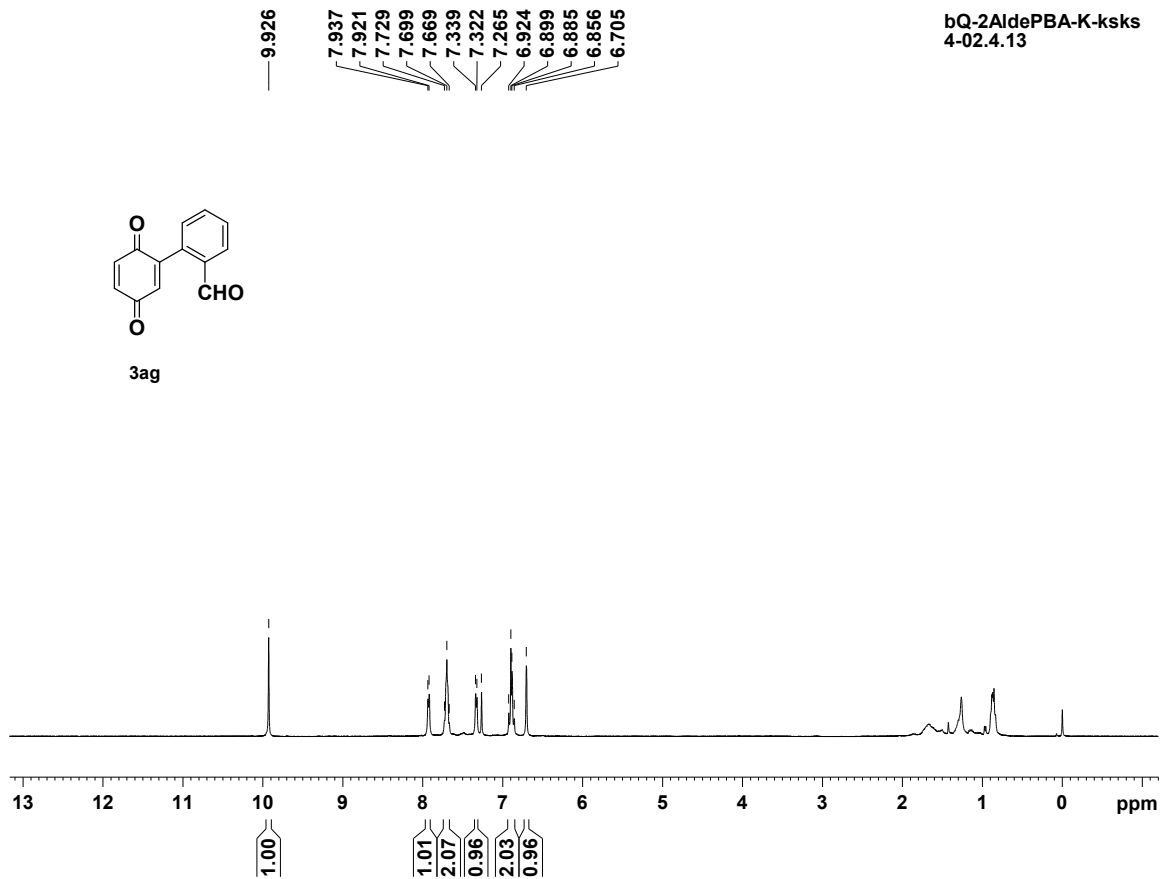



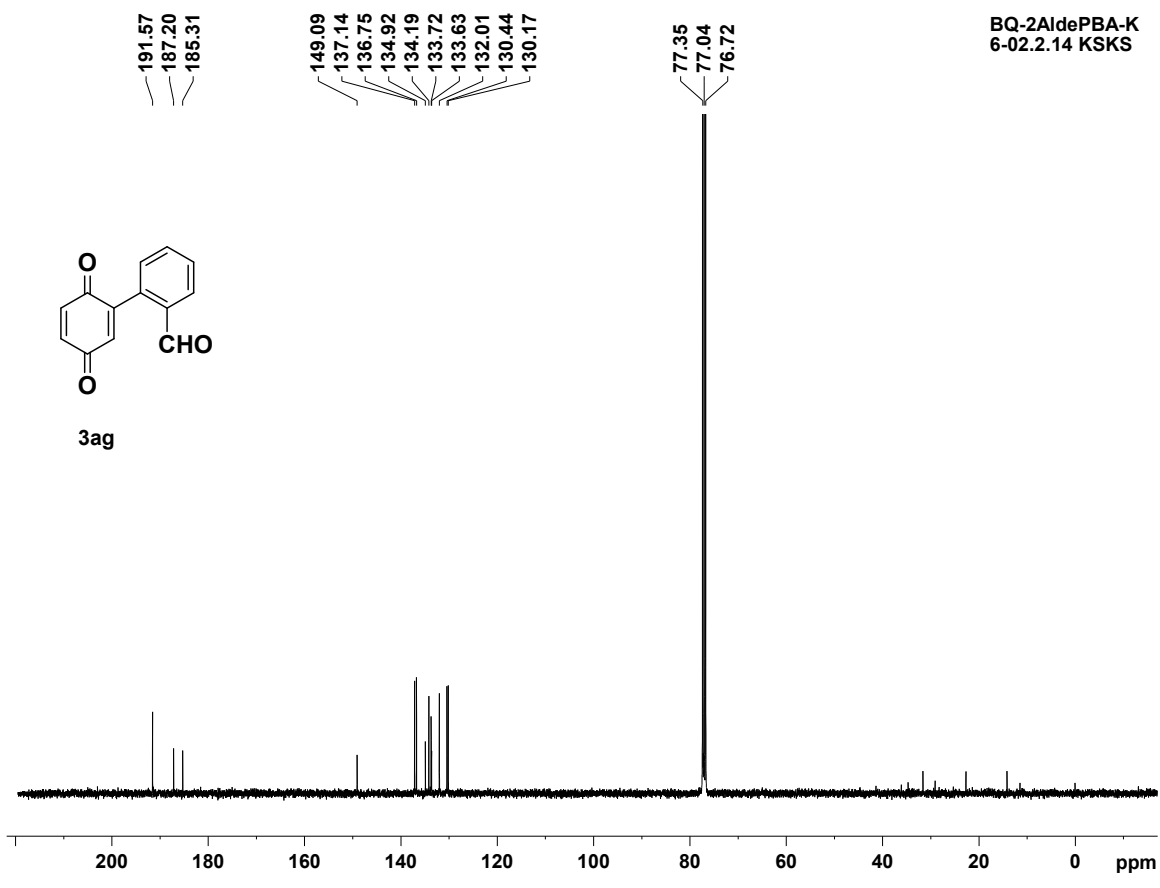

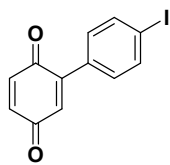

3ah

7.806  
7.785  
7.260  
7.227  
7.207  
6.885  
6.860  
6.848  
6.823  
6.817

BQ4IPBA-K  
18-22.3.14

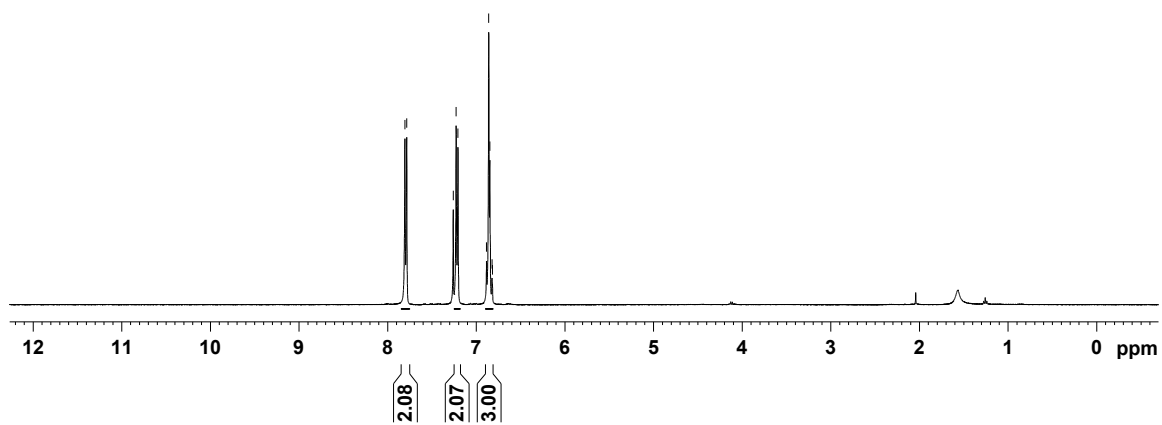

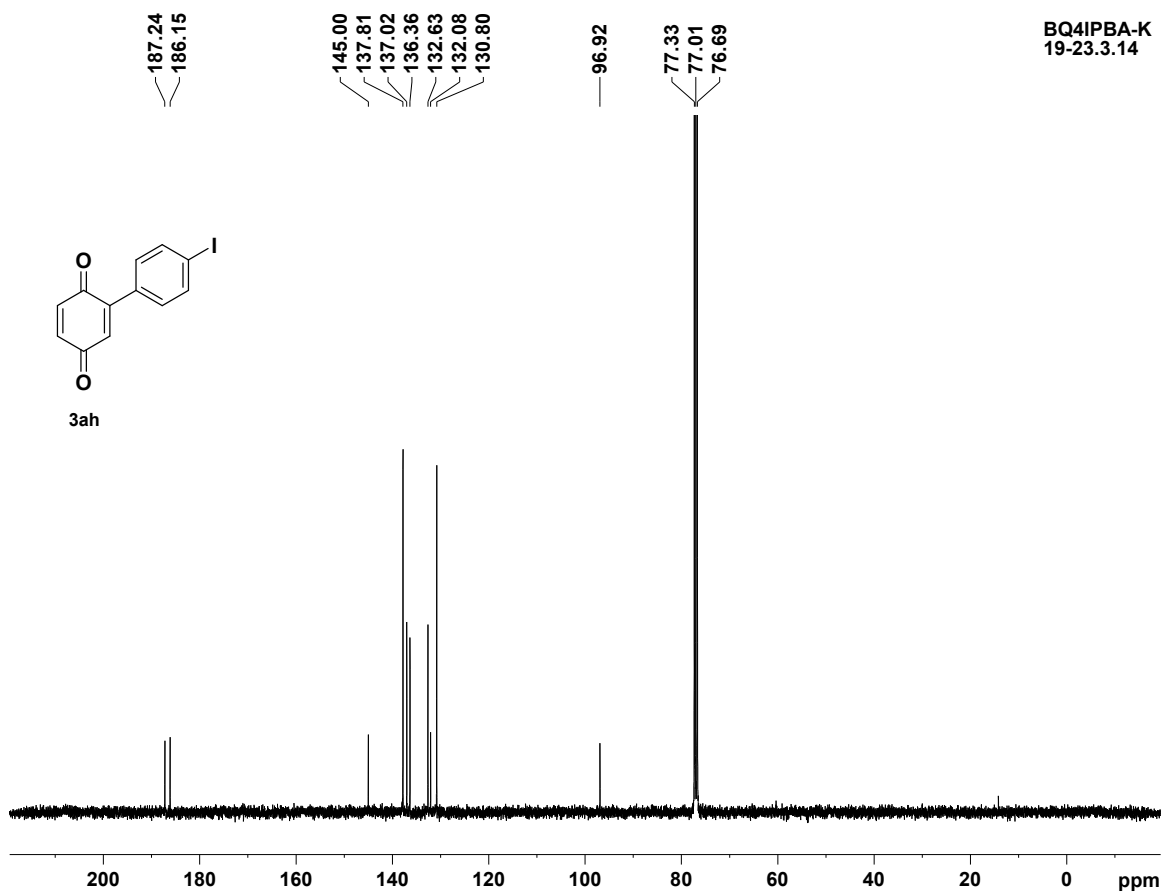

BQ4CIPBA-K  
1-10.5.14

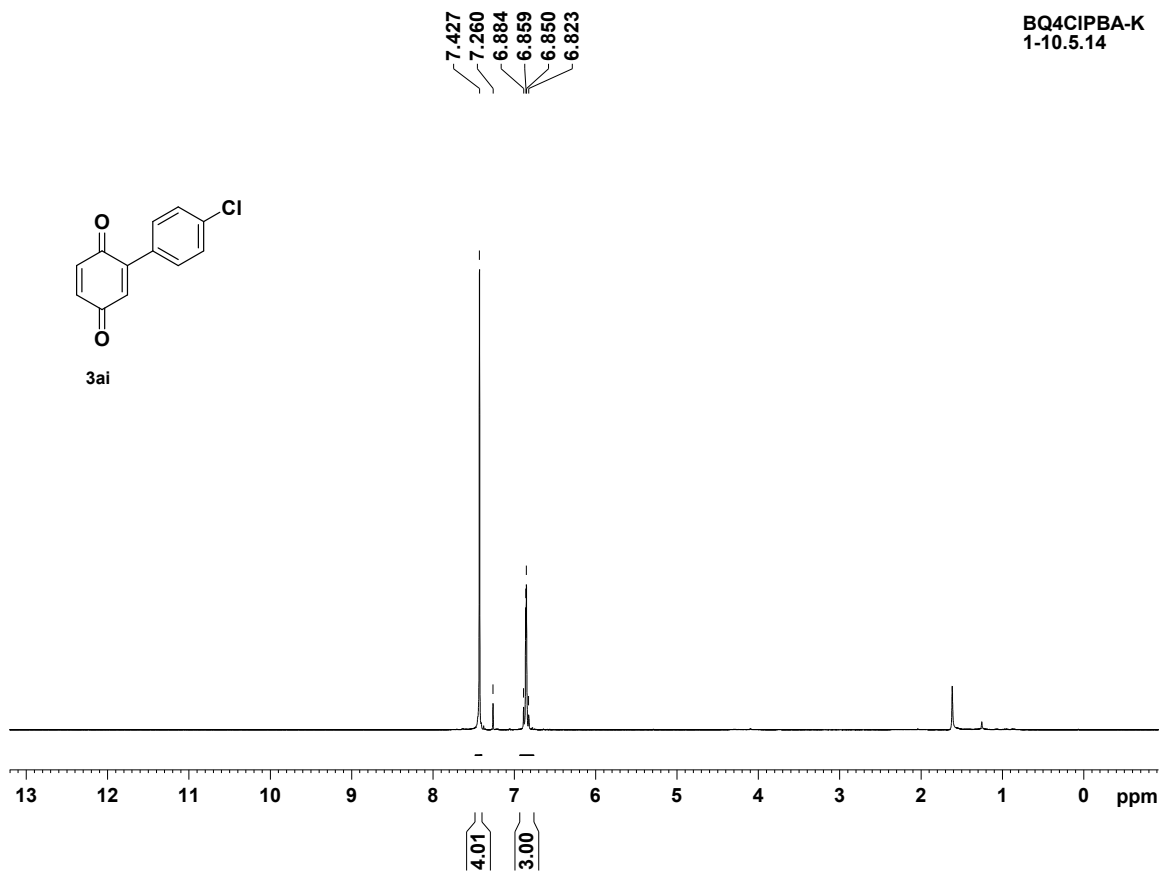

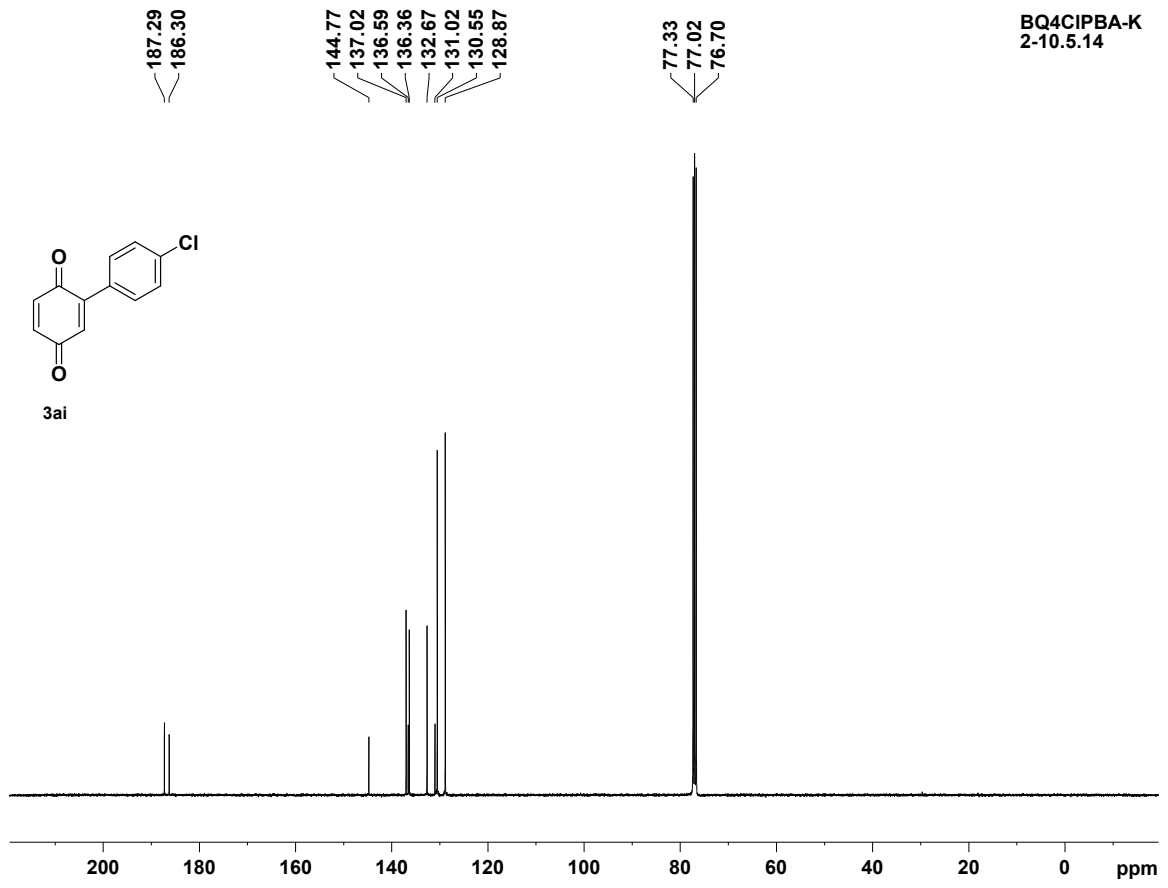

BQ4BrPBA-K  
27-09.5.14

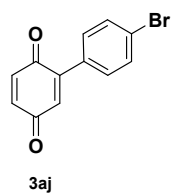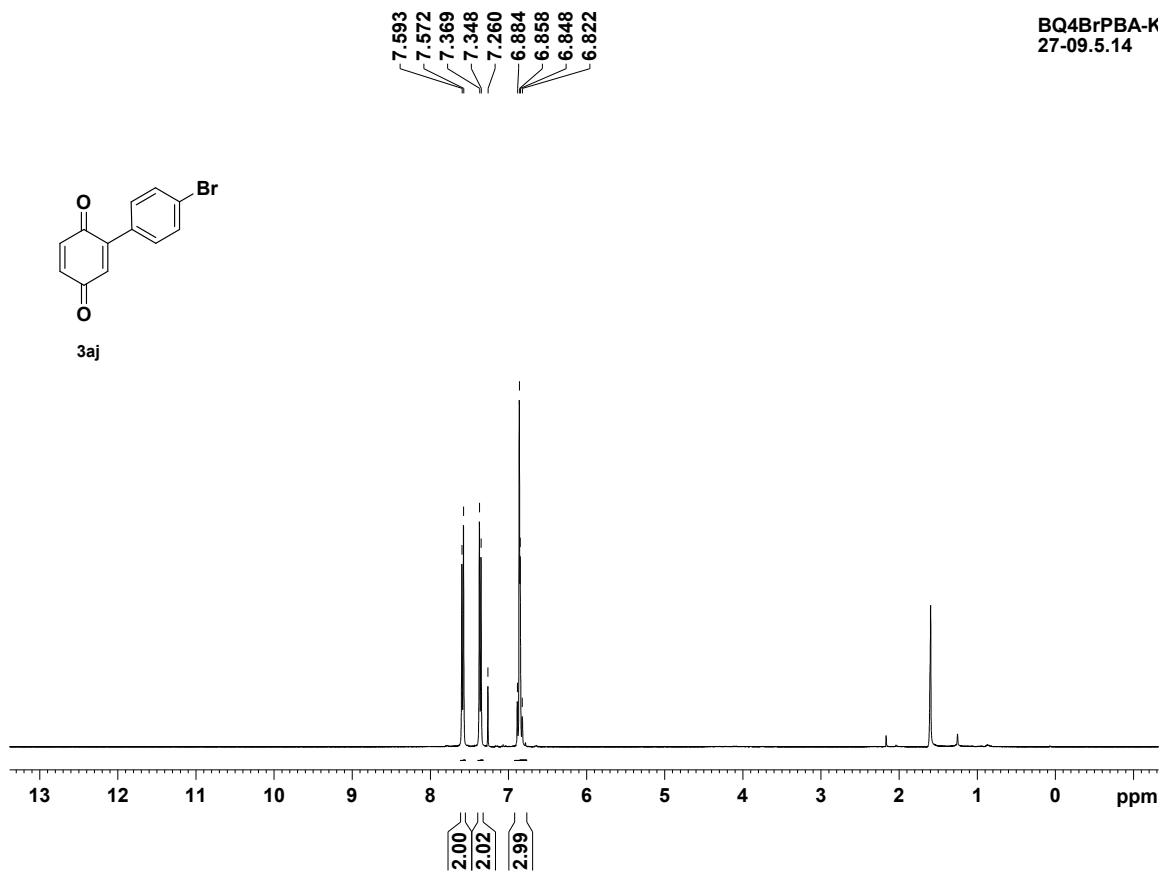

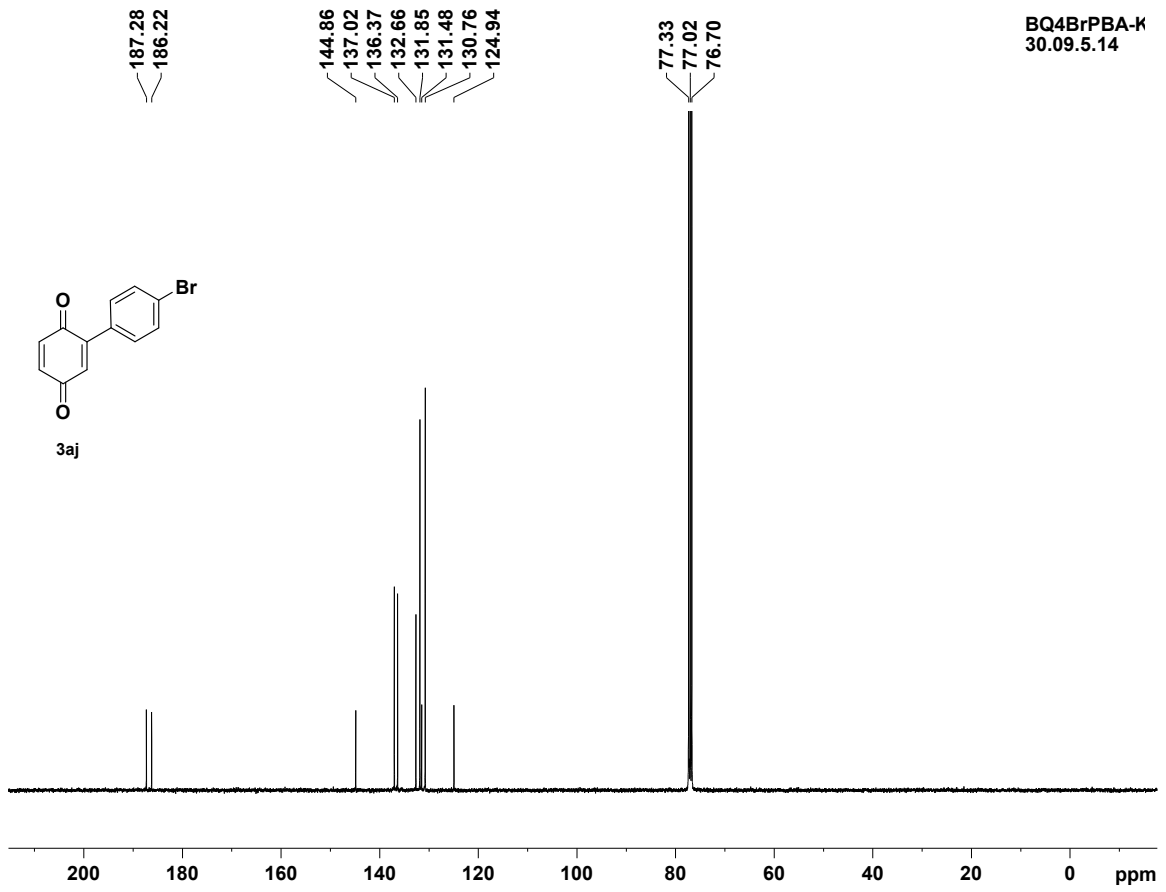

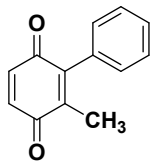

3bka

7.455  
7.449  
7.260  
6.801  
6.795  
6.686  
6.682  
6.676

2.141  
2.138

2MeBQPH-K  
39-29.3.14

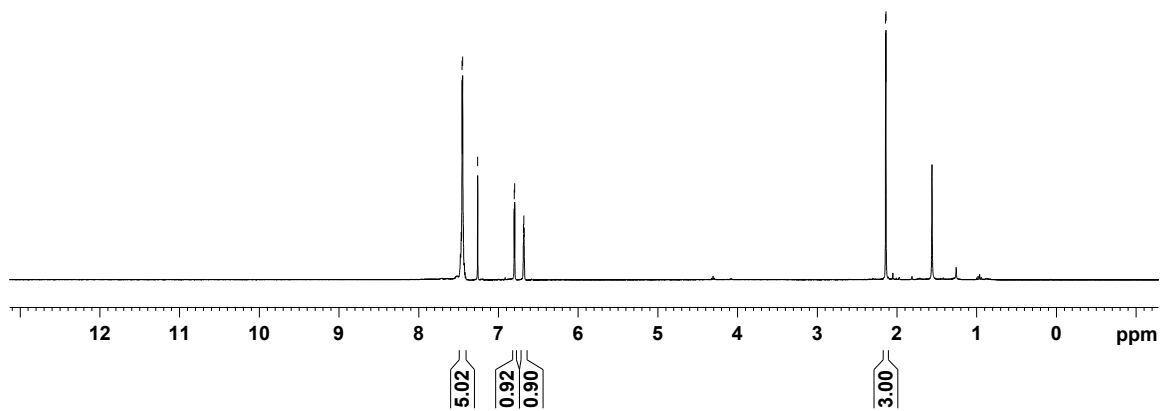



2MeBQPH-K  
41-29.3.14

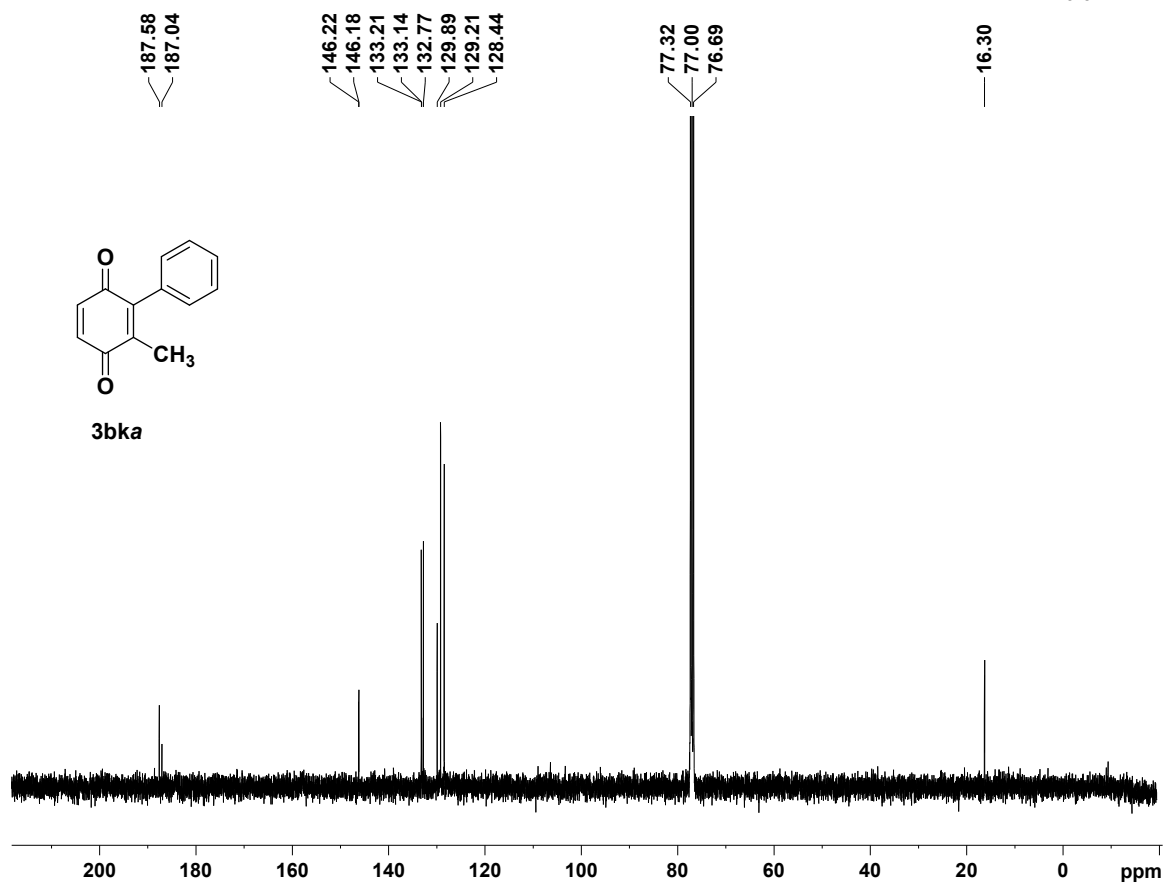

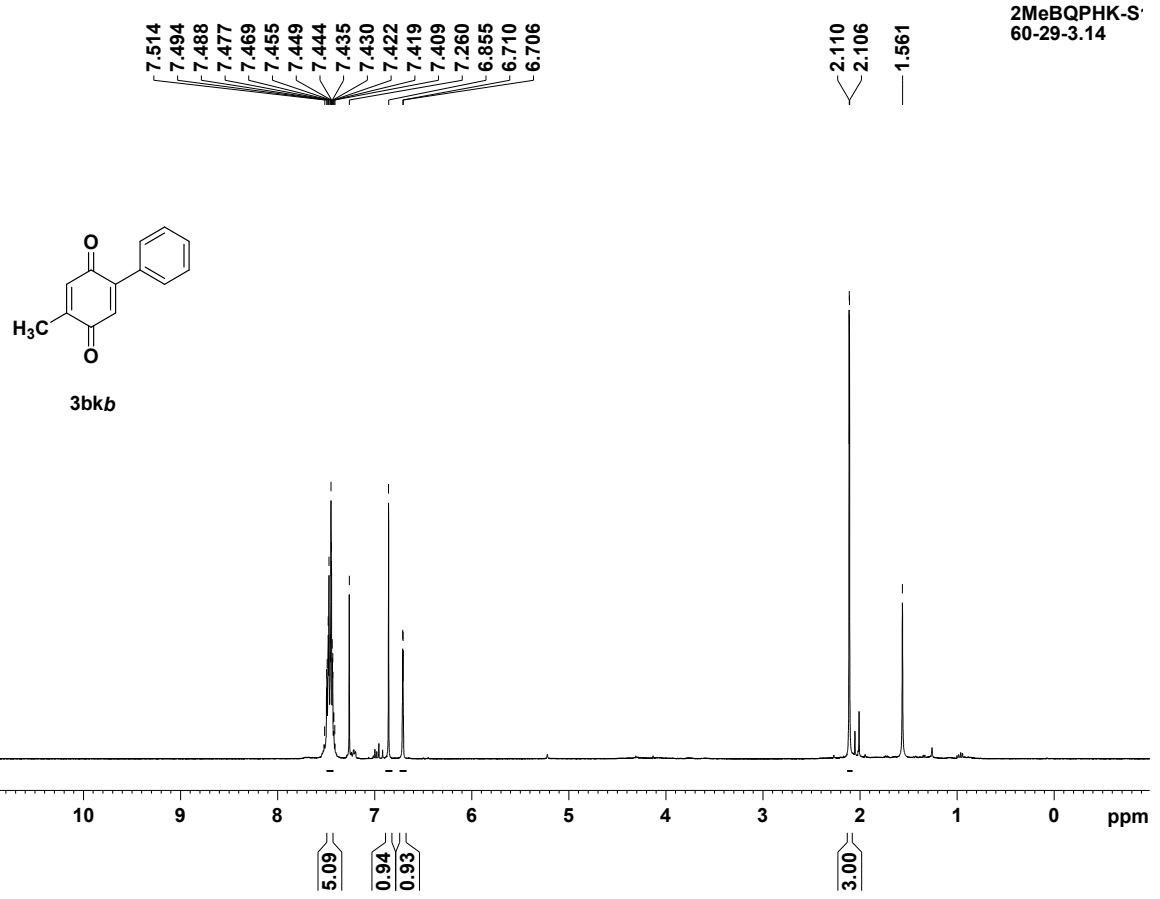

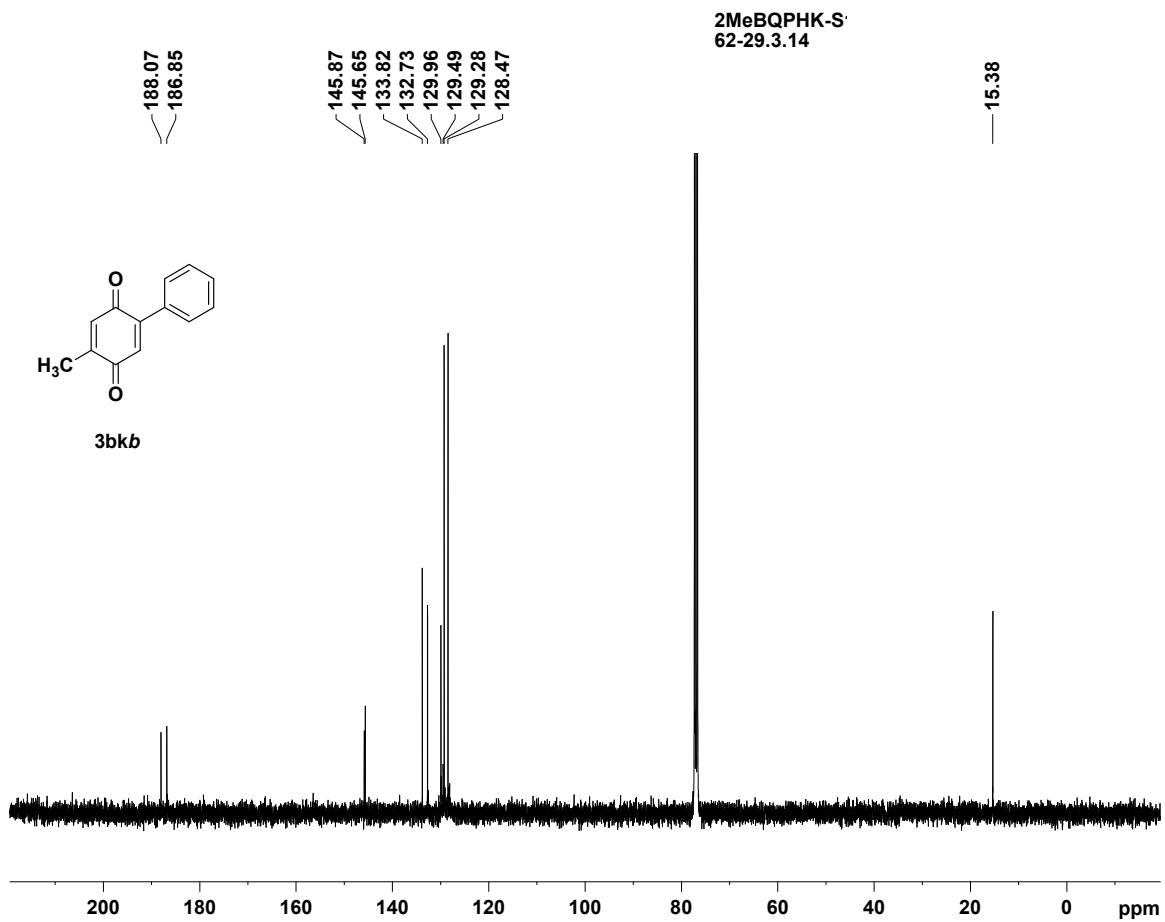

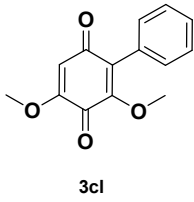

7.440  
7.433  
7.418  
7.400  
7.385  
7.370  
7.366  
7.304  
7.299  
7.285  
7.281  
7.260  
5.964

3.852  
3.746

2,6 OMeBQPH-K  
32-27.3.14

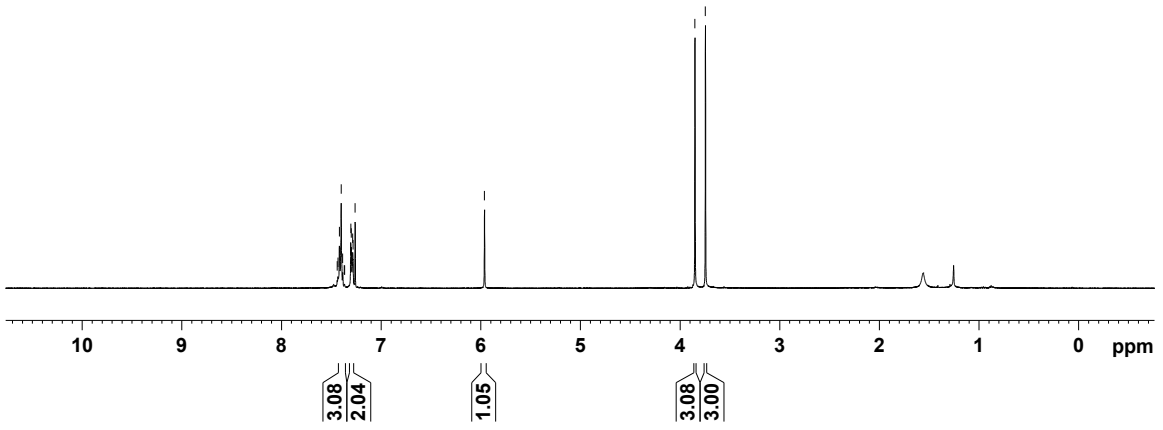

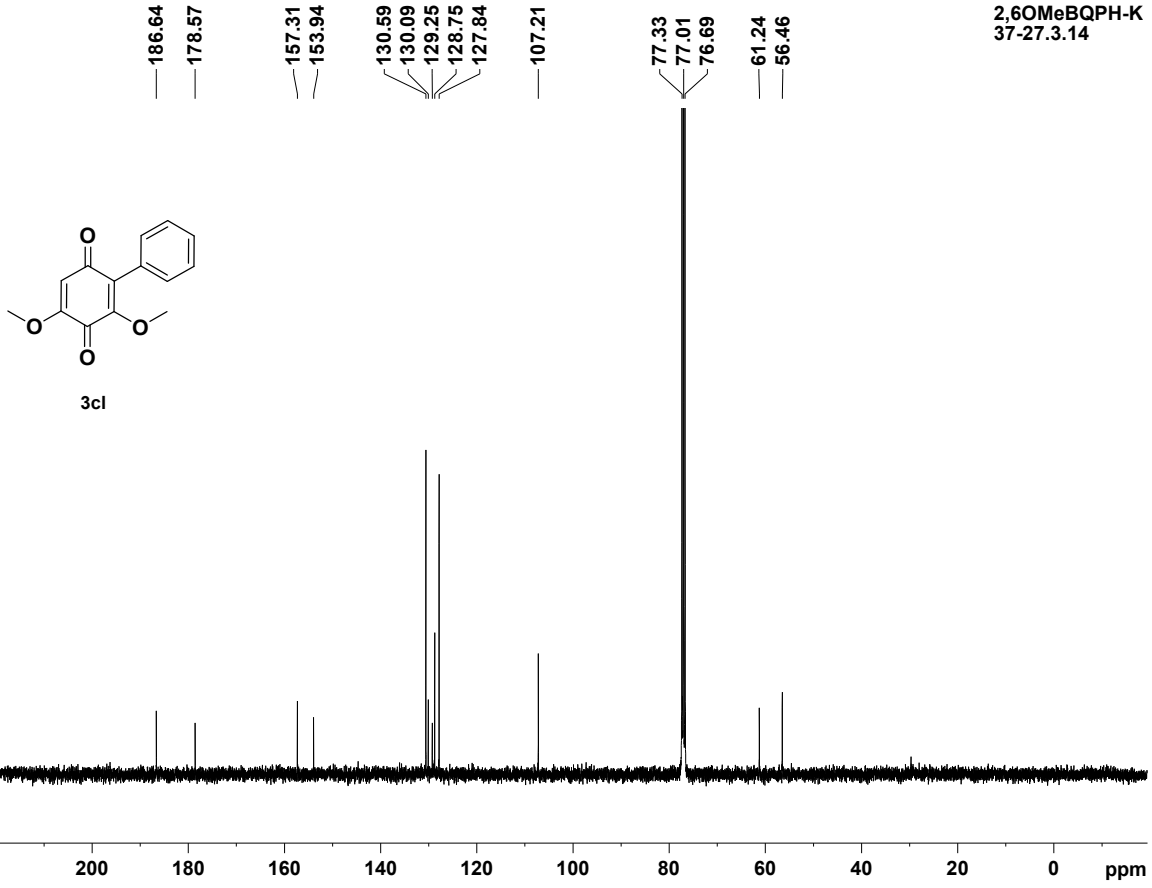

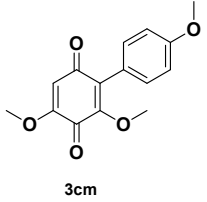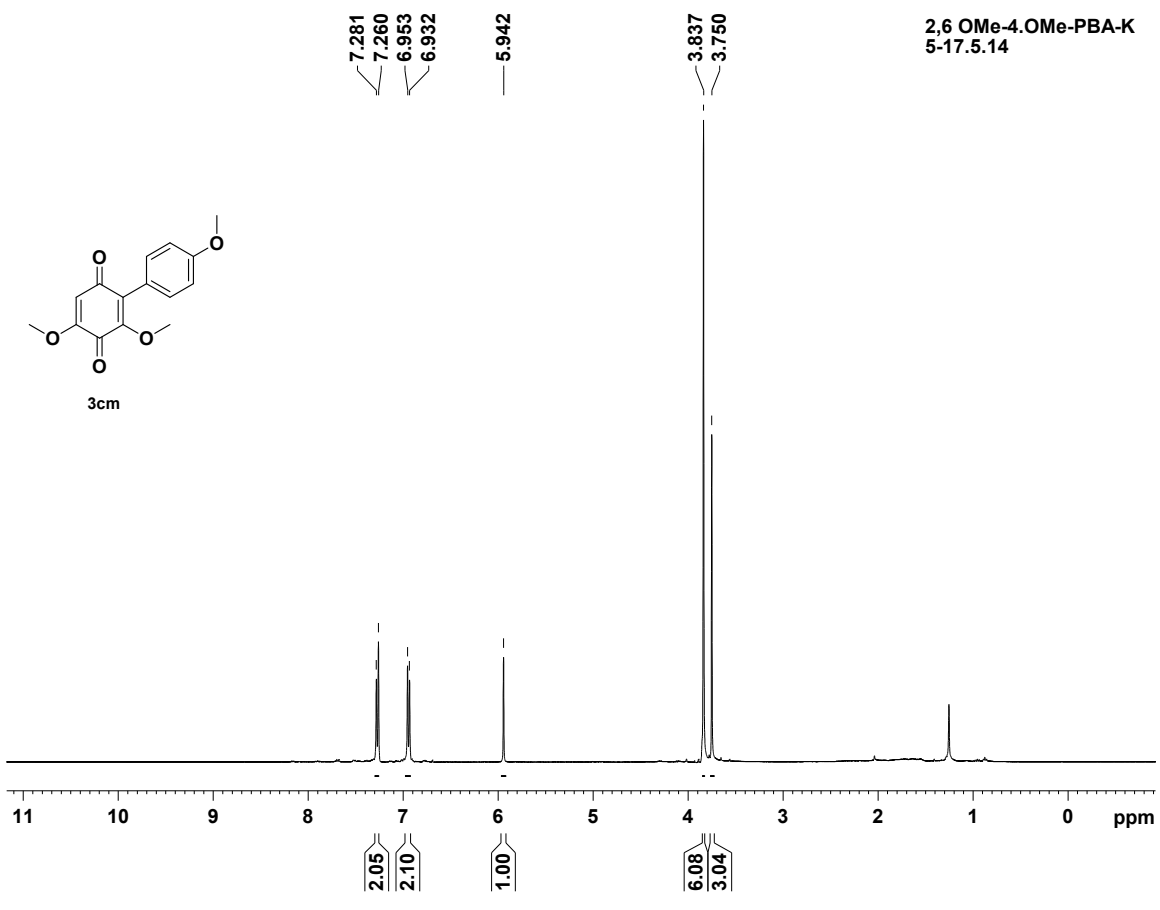

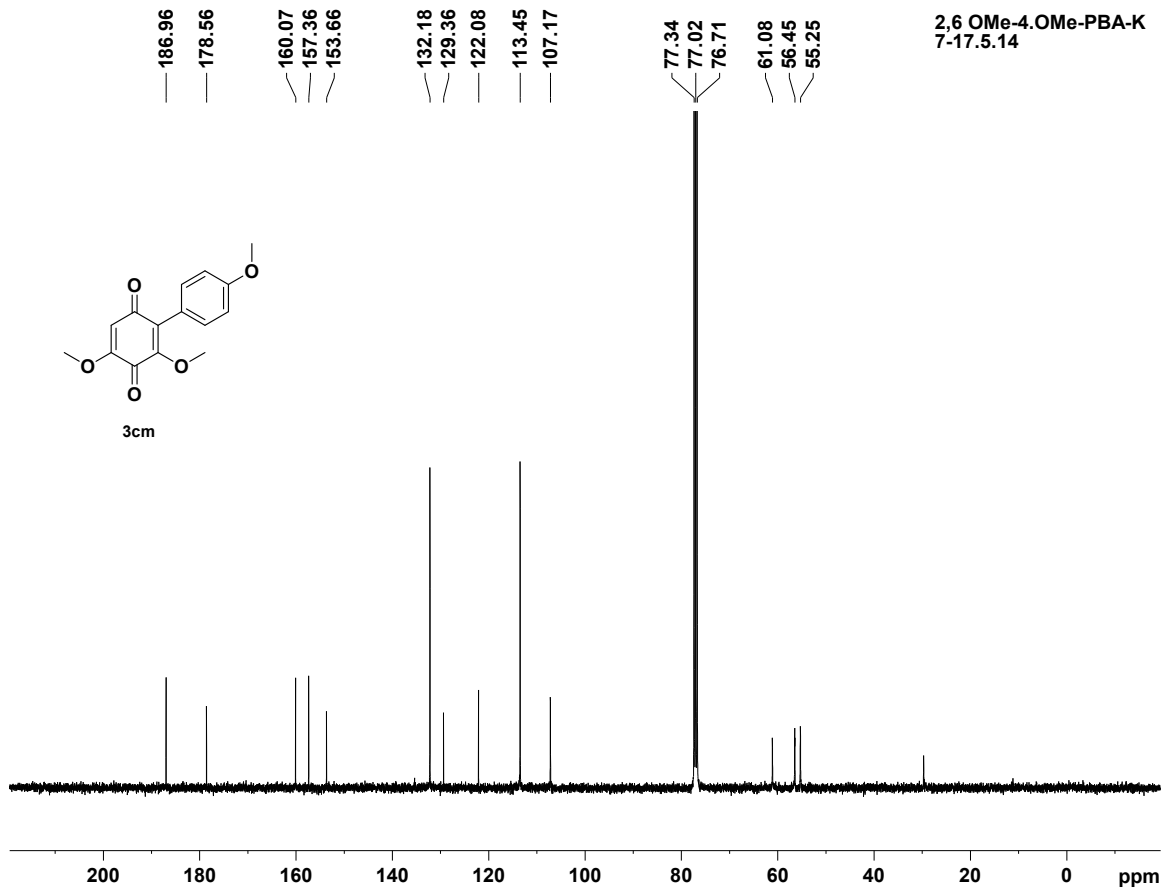

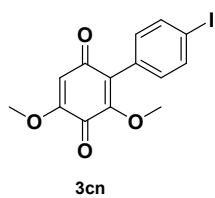

7.760  
7.741  
7.260  
7.051  
7.031  
5.951  
3.846  
3.805

2,6OMe4IPBA-K-S1  
30-14.5.14

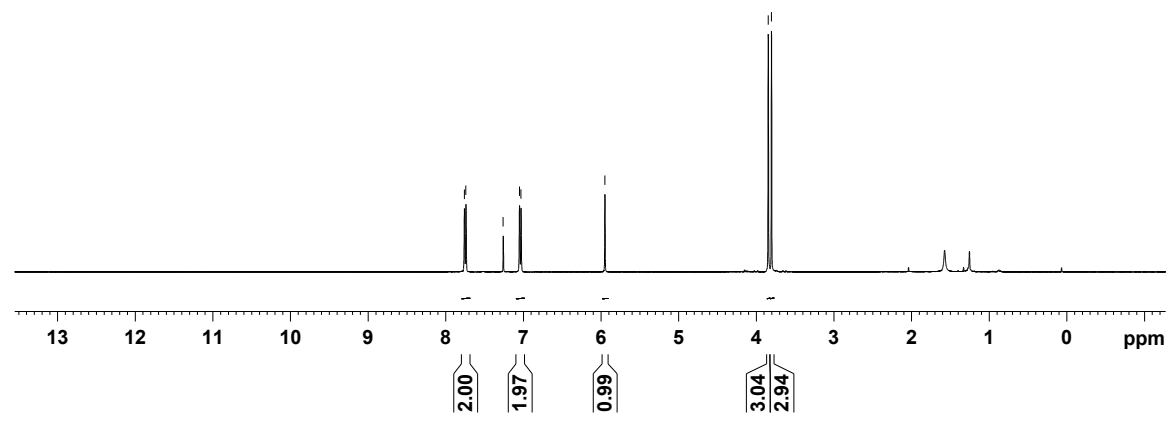



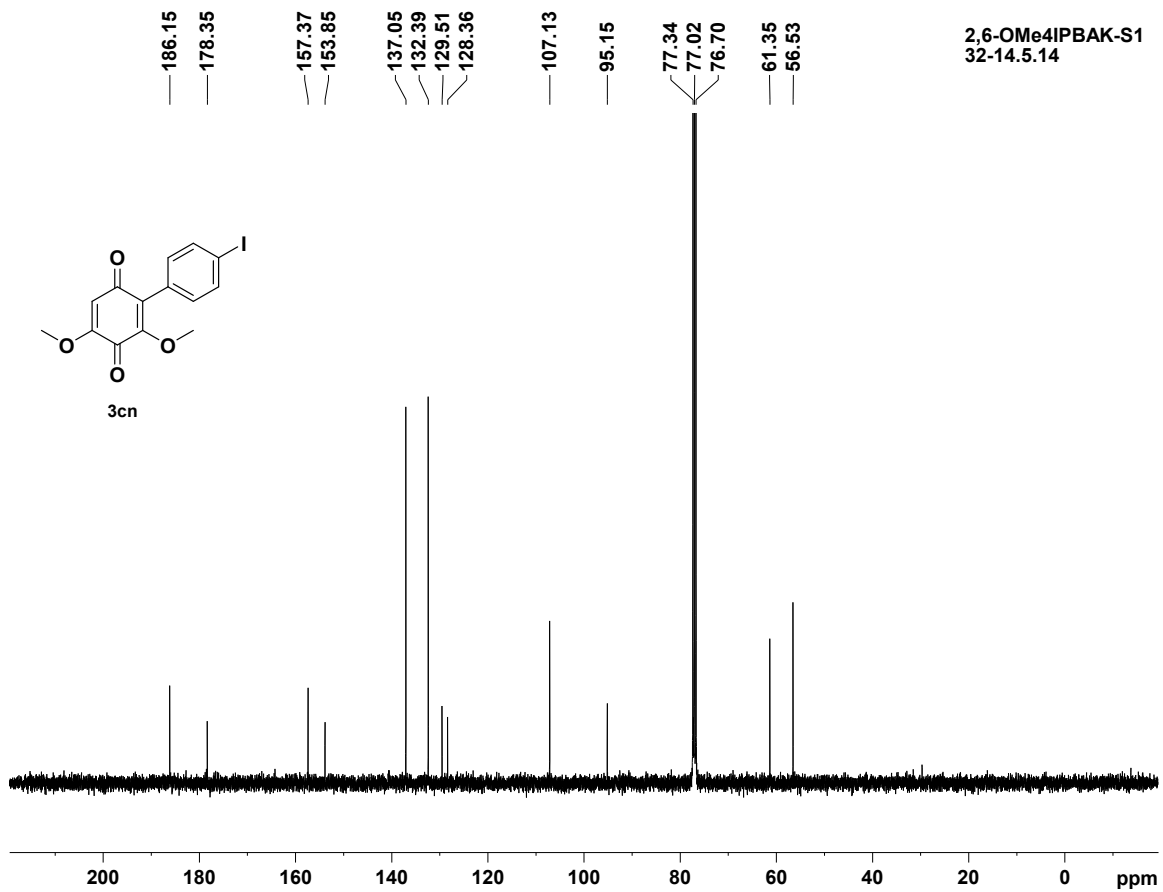

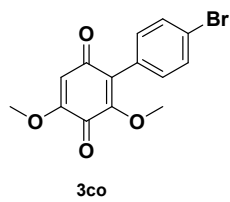

26OMeBQ4BrPBA-I  
22-20.5.14

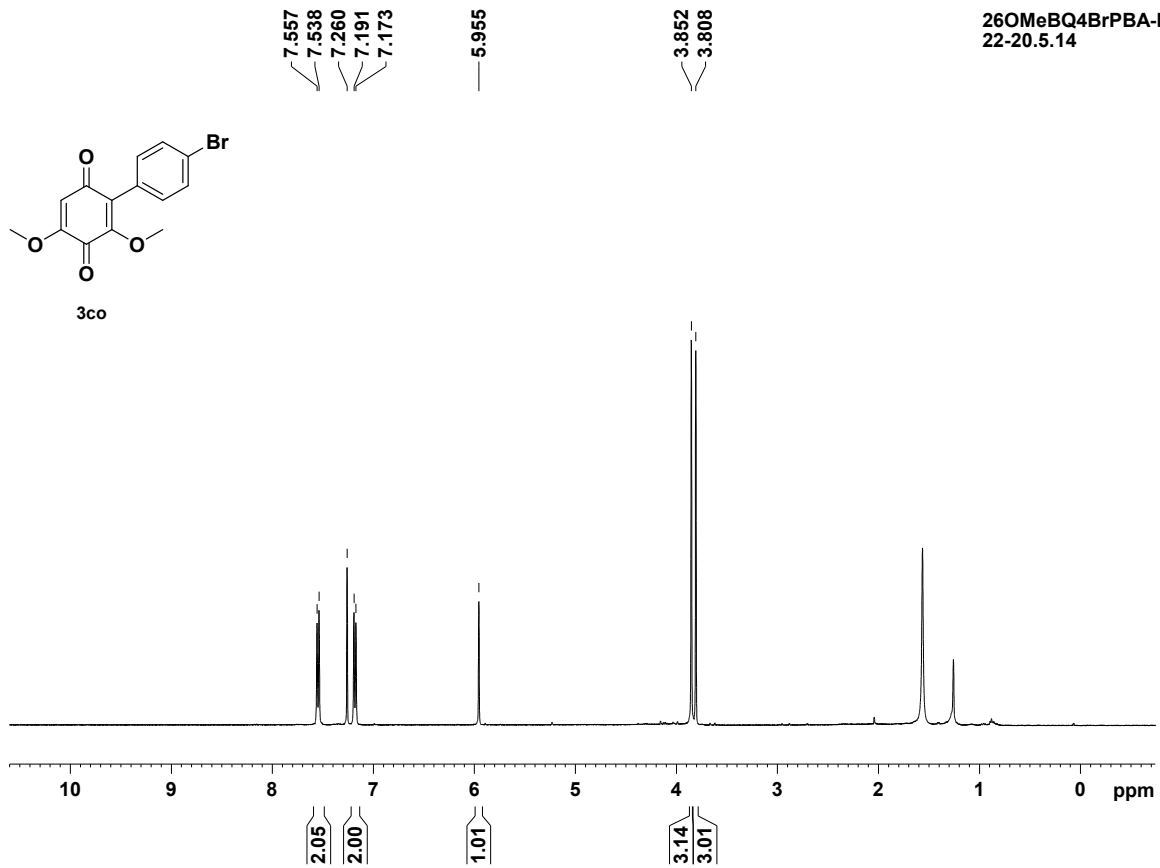

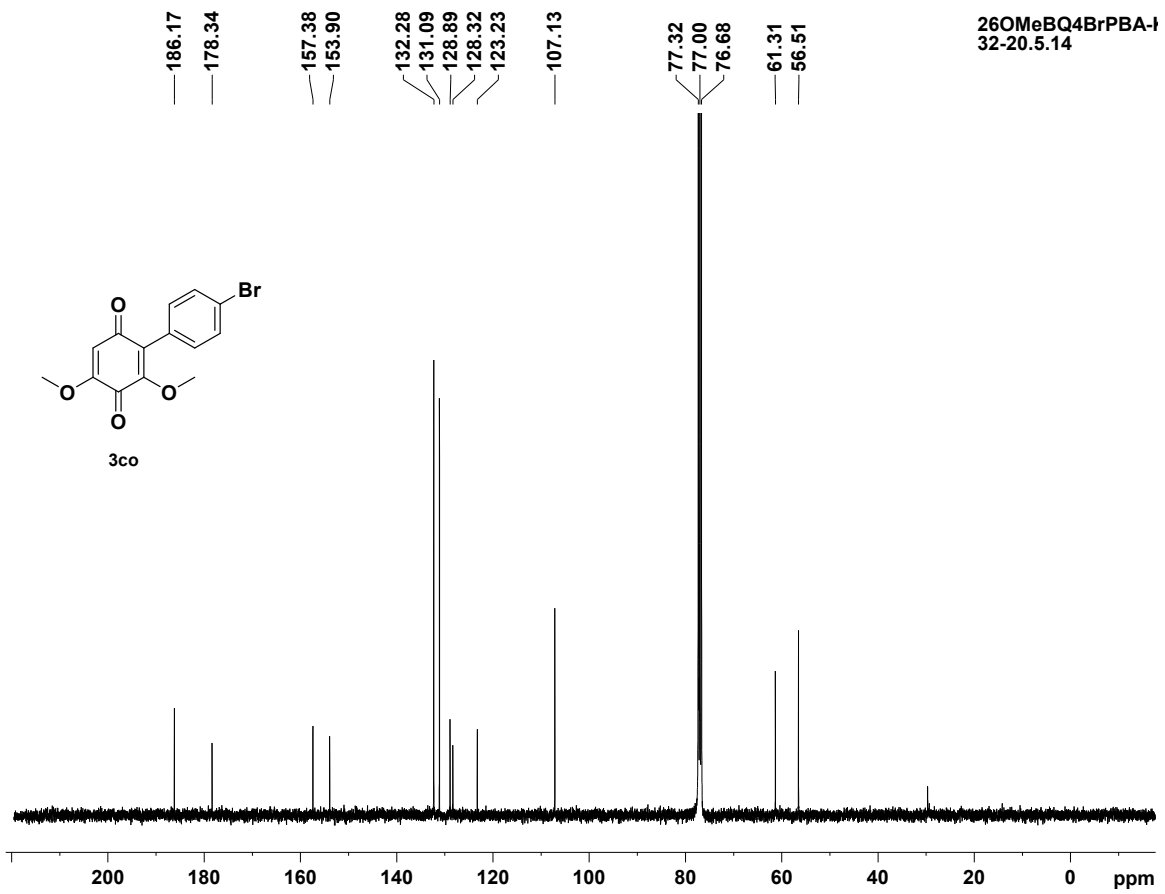

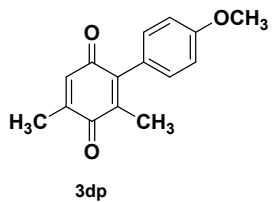

7.258  
7.101  
7.080  
6.961  
6.940  
6.636

3.836

2.095  
1.992

25Dm-4-OMe-Pdt  
13232015

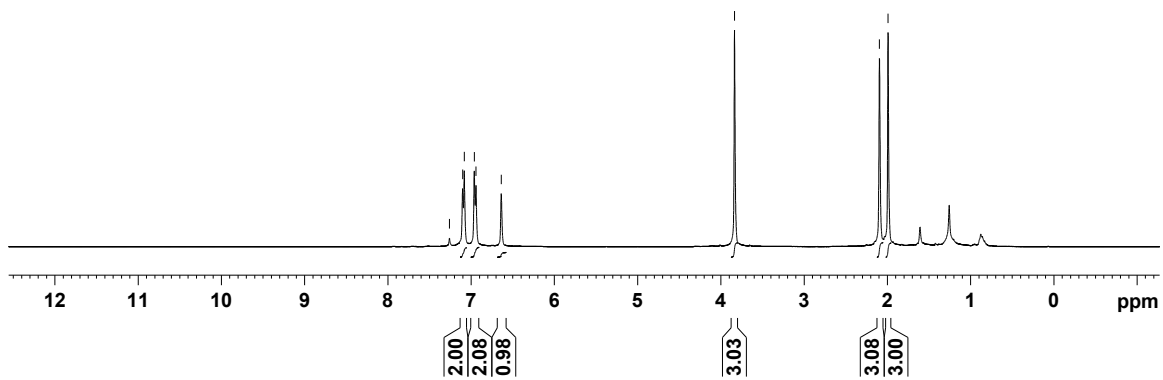

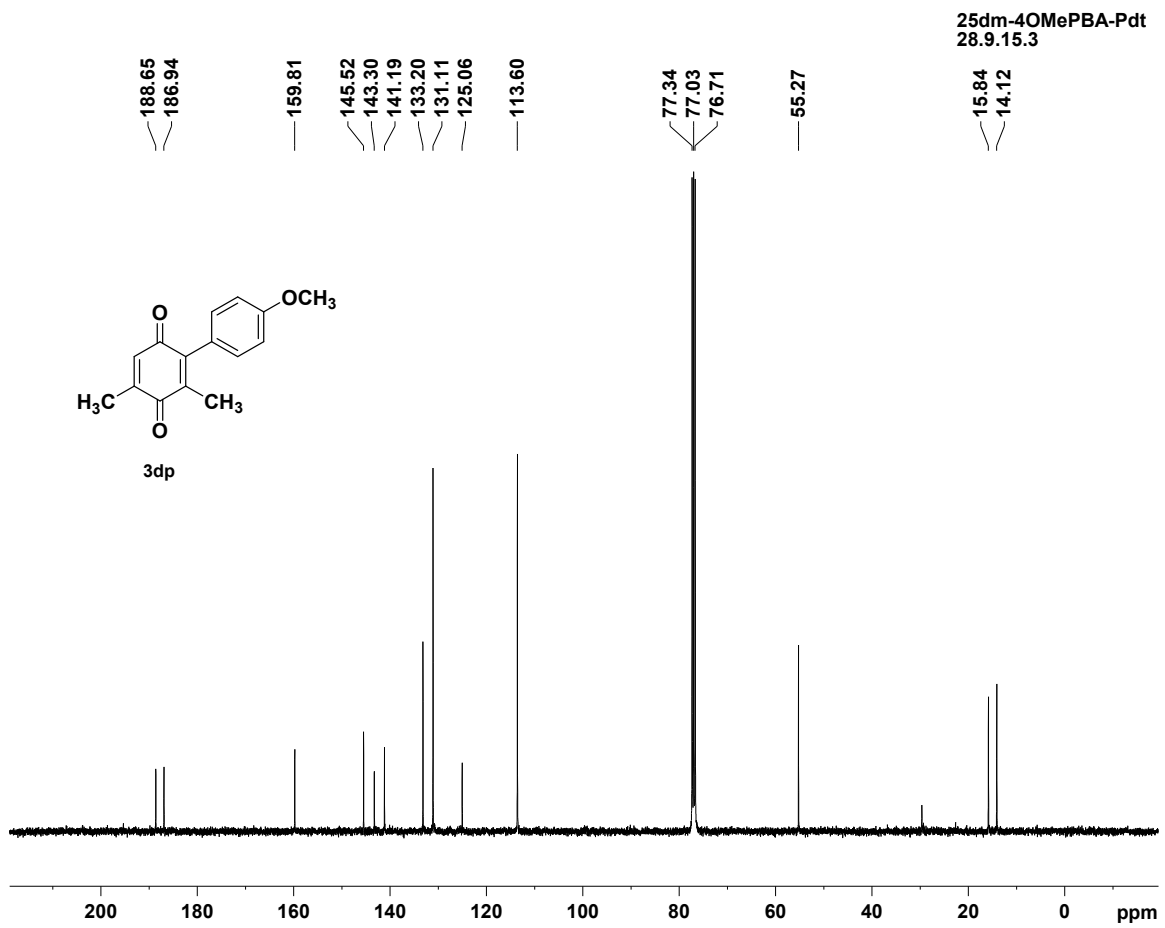

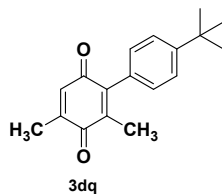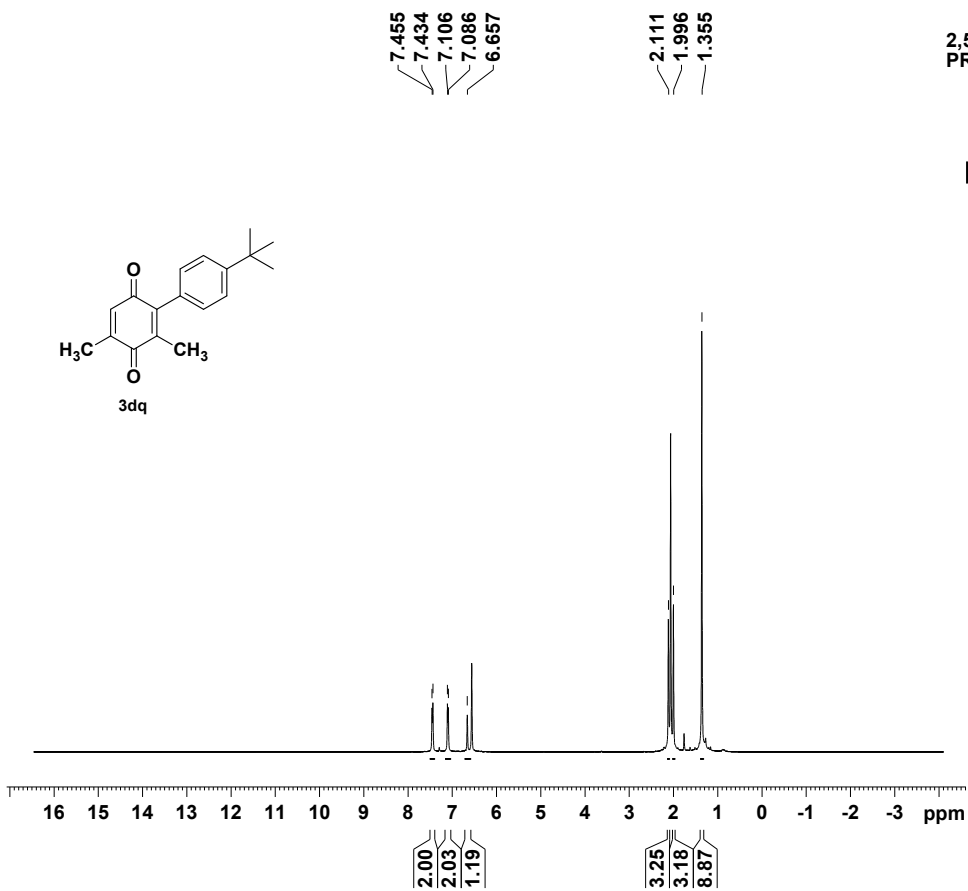

2,5 dm-4tuPBAK  
PROTON CDCl3 {D:\da

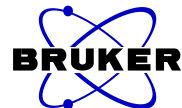

```

NAME Sep16-2015-alap
EXPNO 9
PROCNO 1
Date_ 20150916
Time 12.39
INSTRUM spect
PROBHD 5 mm PABBO BB-
PULPROG zg30
TD 65536
SOLVENT CDCl3
NS 16
DS 2
SWH 8223.685 Hz
FIDRES 0.125483 Hz
AQ 3.9846387 sec
RG 64
DW 60.800 usec
DE 6.50 usec
TE 301.4 K
D1 1.00000000 sec
TD0 1
----- CHANNEL f1 -----
NUC1 1H
P1 14.10 usec
PL1 -1.00 dB
PL1W 12.38612985 W
SFO1 400.1324710 MHz
SI 32768
SF 400.1300000 MHz
WDW EM
SSB 0
LB 0.30 Hz
GB 0
PC 1.00

```

2,5DM-4TbuPBAK  
1116092015

188.61  
188.13  
187.53  
186.80

151.45  
145.76  
145.44  
143.63  
141.41  
133.28  
133.23  
129.87  
129.32  
124.96

77.36  
77.05  
76.73

34.66  
31.25

15.89  
15.79  
14.09

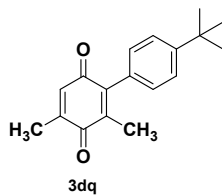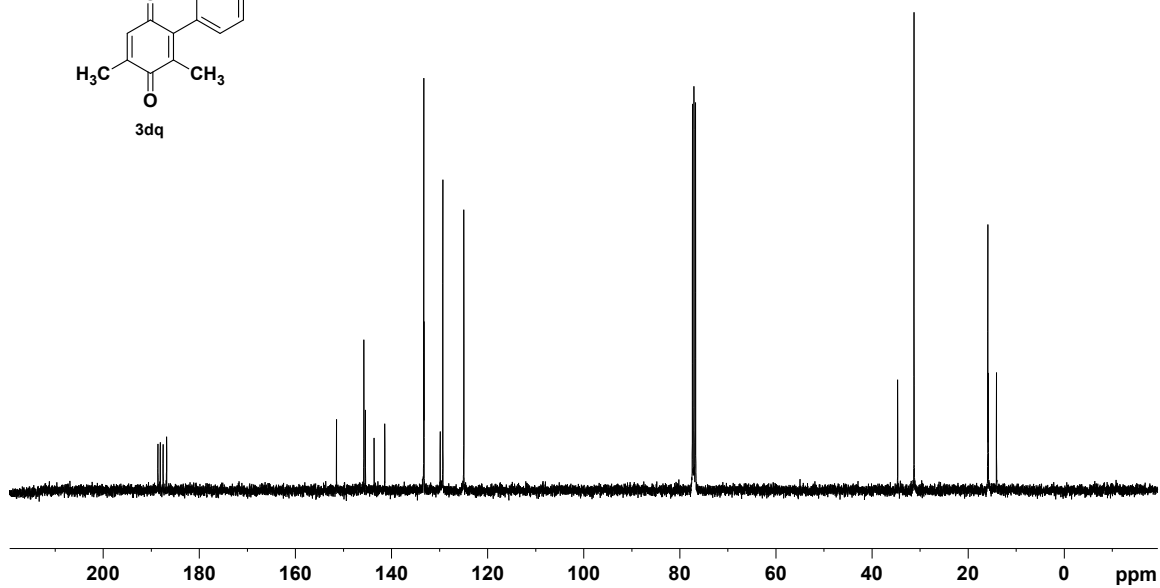

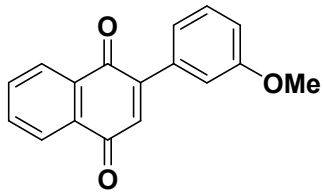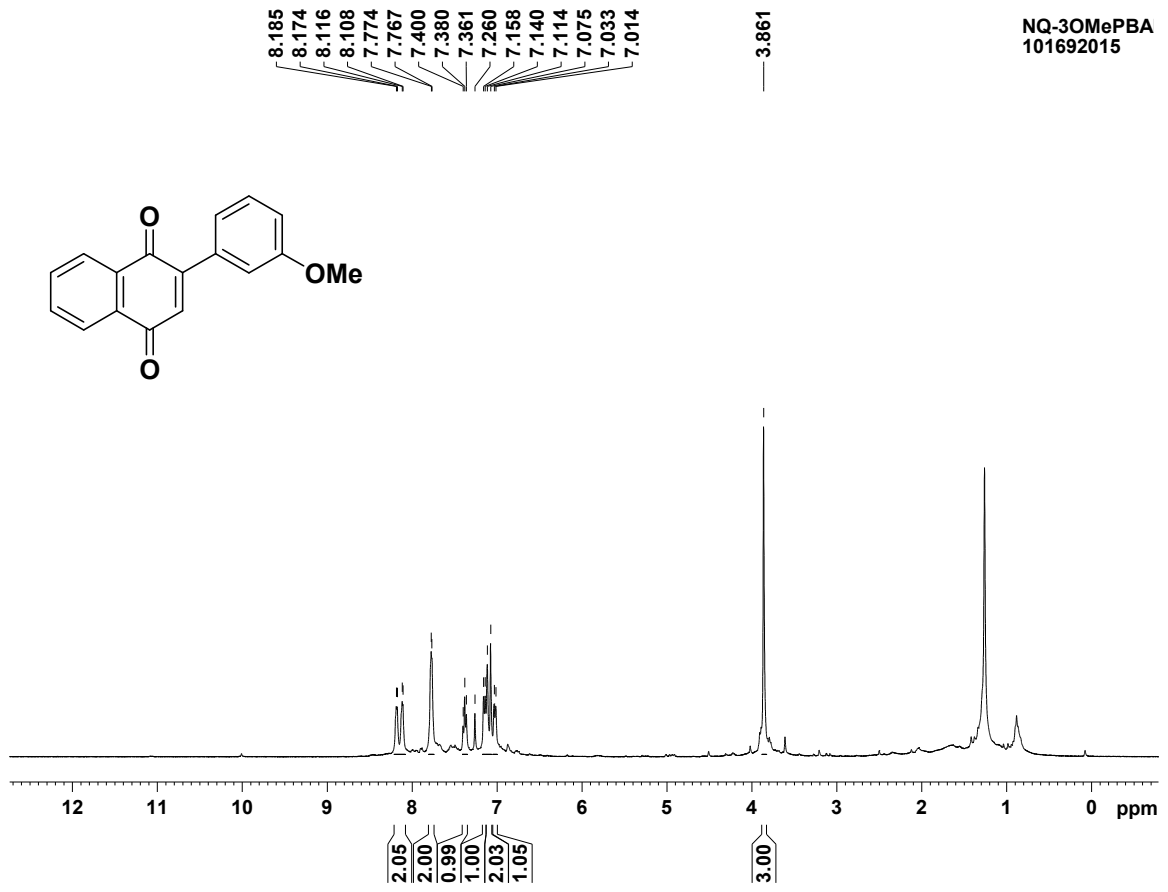



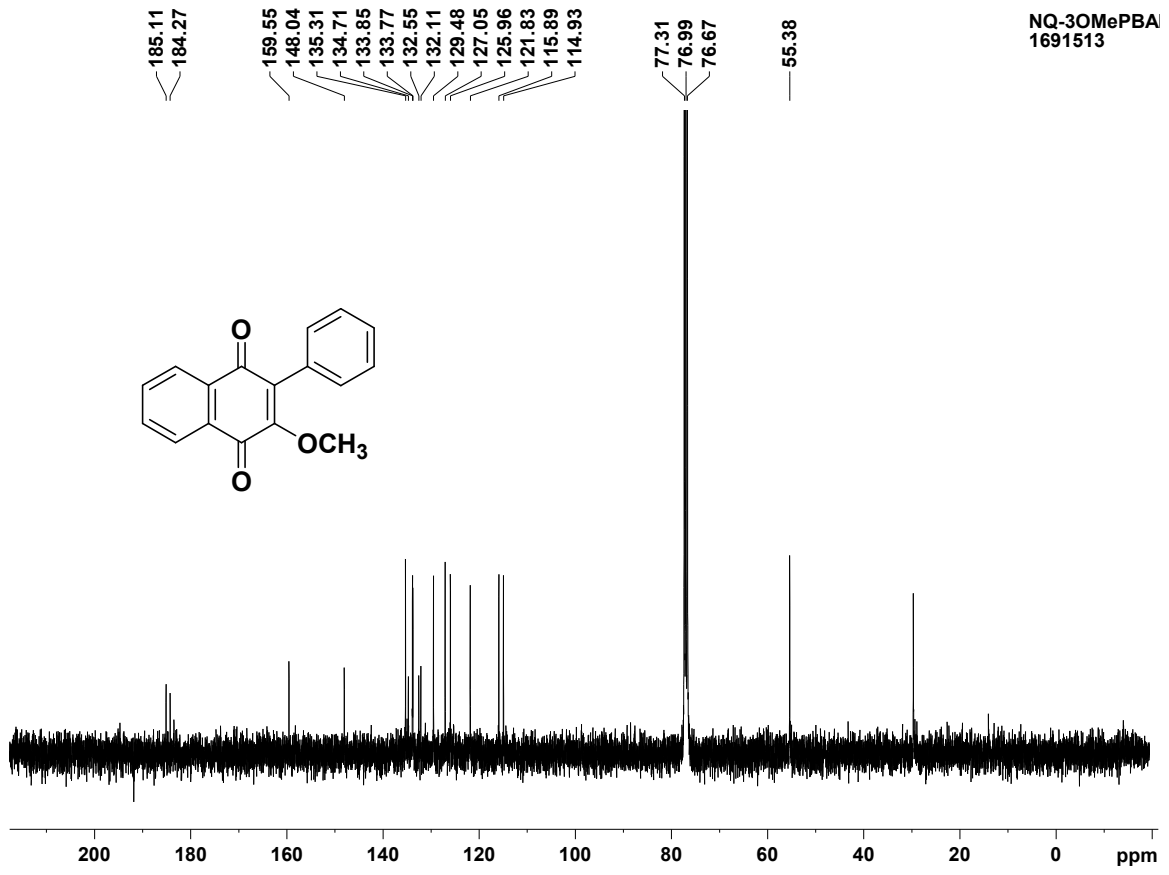

BQ2.5CIPBA-K  
33-29.3.14

7.489  
7.480  
7.472  
7.314  
7.303  
7.295  
7.290  
7.286  
7.279  
7.260  
7.233

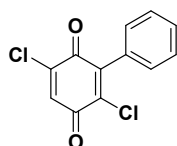

3er

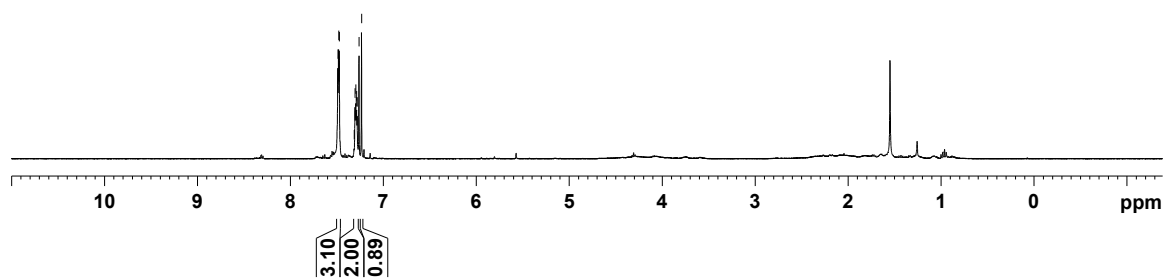

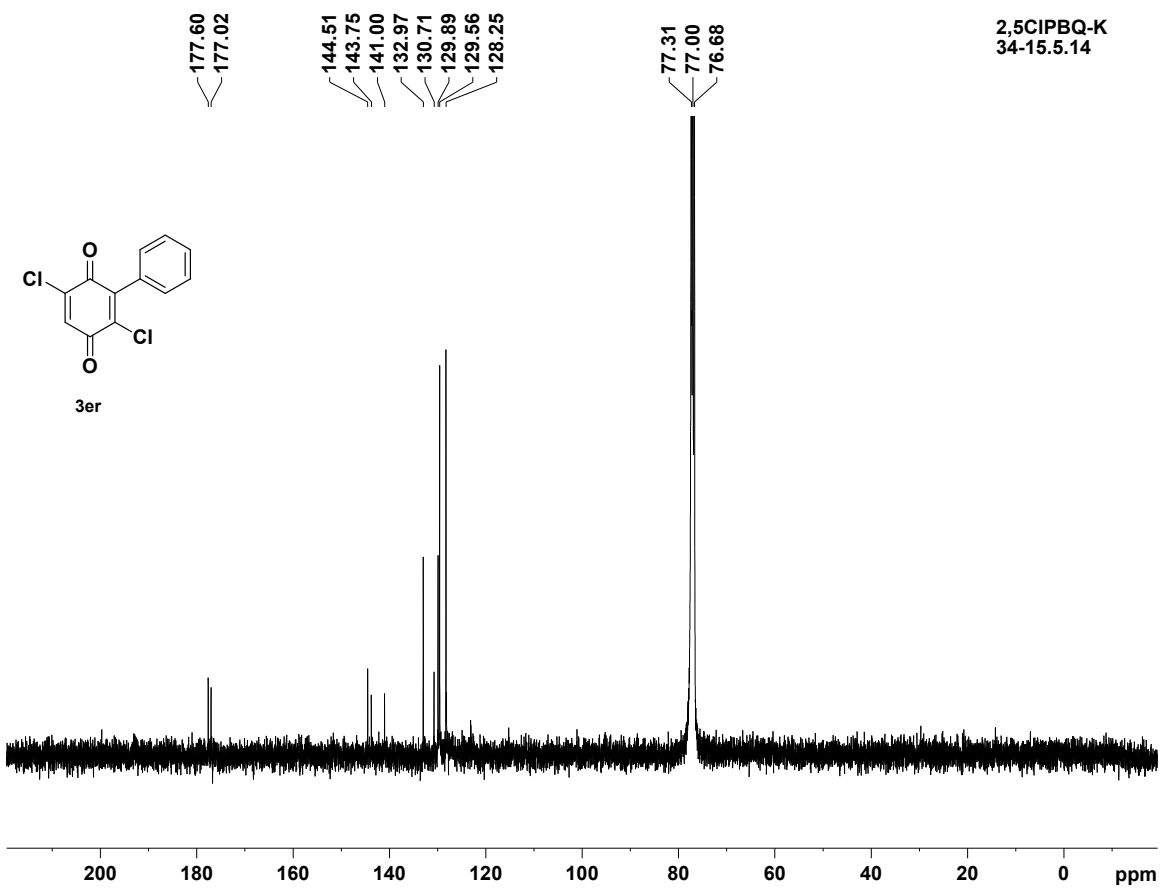



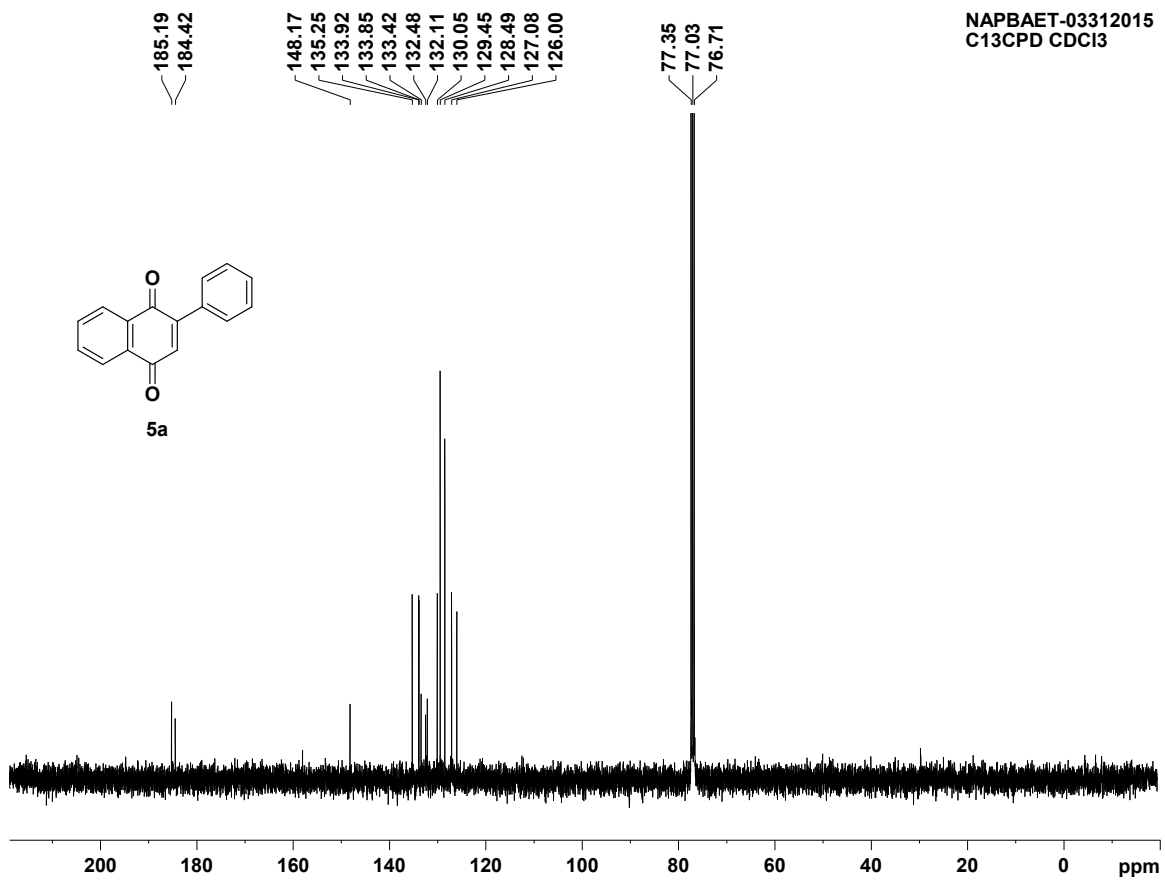

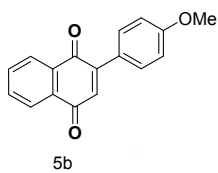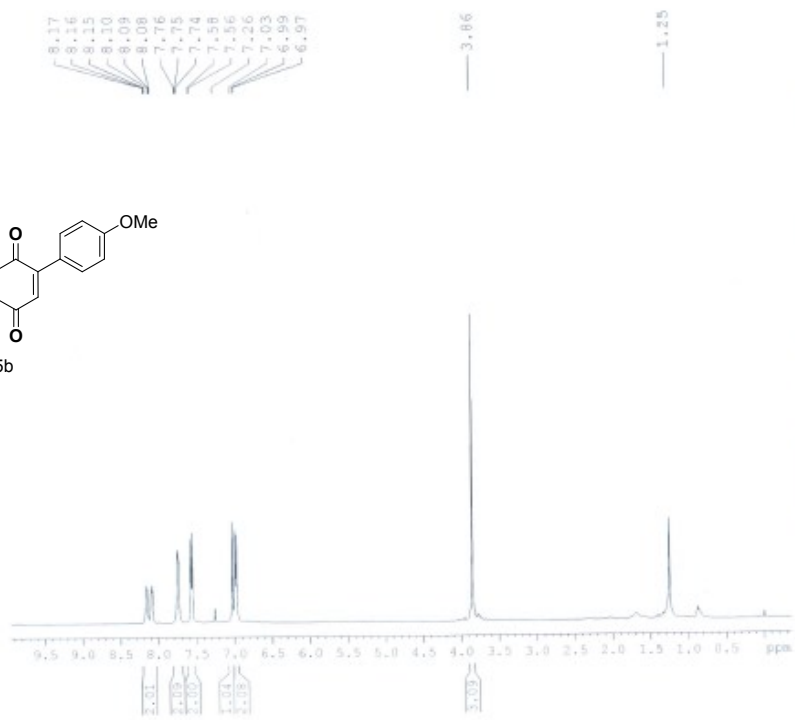

```

Current Data Parameters
NAME      M7-40Me
EXPNO    1
PROCNO   1

F2 - Acquisition Parameters
Date_    20150719
Time     14.50
INSTRUM  spect
PROBHD   5 mm BBO-13C-1
PULPROG  zg30
TD       65536
SOLVENT  CDCl3
NS       16
DS       2
SWH      8221.685 Hz
FIDRES   0.125483 Hz
AQ       3.464307 sec
RG       114
SW       60.800 usec
DE       2.30 usec
TE       297.3 K
D1       1.0000000 sec
TD0      1

===== CHANNEL f1 =====
NUC1      13
PC       11.42 usec
PL1      -3.00 dB
SFO1     400.1224110 MHz

F2 - Processing parameters
SI       32768
SF       400.1300052 MHz
WDW      EM
SSB      0
LB       0.30 Hz
GB       0
PC       1.08
  
```

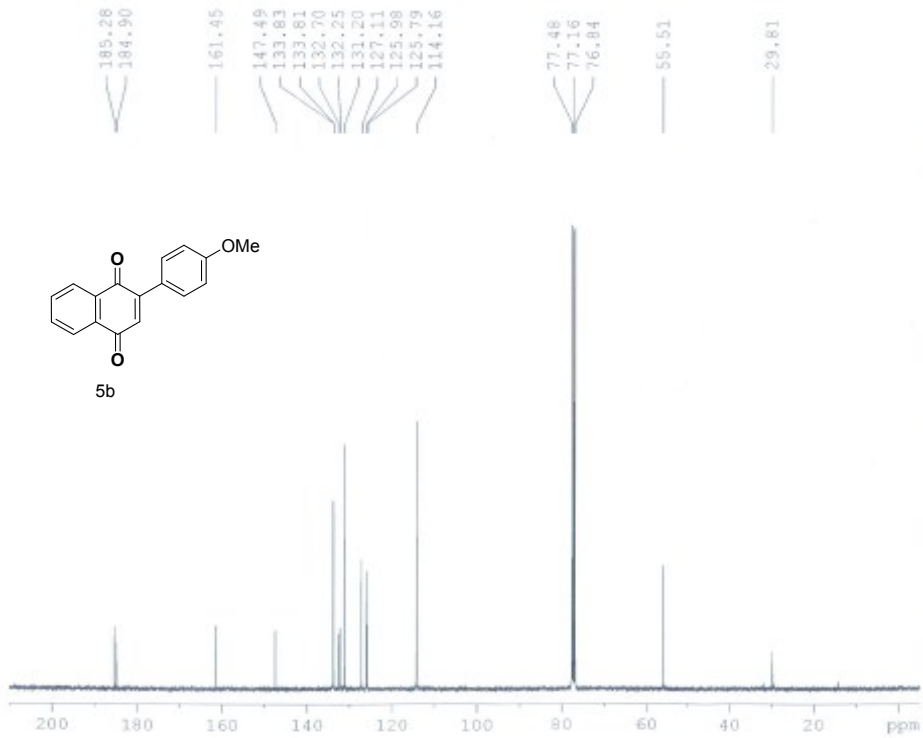

```

Current Data Parameters
NAME          NT-400a
EXPNO        2
PROCNO       1

F2 - Acquisition Parameters
Date_        20150709
Time         11.23
INSTRUM      spect
PROBHD       5 mm QNP 13C-1
PULPROG      zgpg30
TD           65536
SOLVENT      CDCl3
NS           419
DS           4
SWH          24018.462 Hz
FIDRES       0.366798 Hz
AQ           1.3631988 sec
RG           57
AQ           20.800 usec
DE           6.00 usec
TE           291.4 K
D1           2.00000000 sec
d11          0.03000000 sec
DELTA        1.89999998 sec
YD0          1

----- CHANNEL f1 -----
NUC1         13C
P1           9.15 usec
PL1          0.00 dB
SFO1         100.6228298 MHz

----- CHANNEL f2 -----
CPDPRG2      waltz16
NUC2         1H
PCPD2        90.00 usec
PL12         14.90 dB
PL13         14.90 dB
PL2          -3.00 dB
SFO2         400.1316005 MHz

F2 - Processing parameters
SI           32768
SF           100.6127548 MHz
WDW          EM
SSB          0
LB           1.00 Hz
GB           0
PC           1.40

```

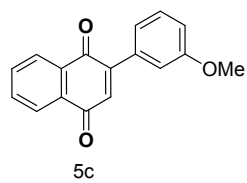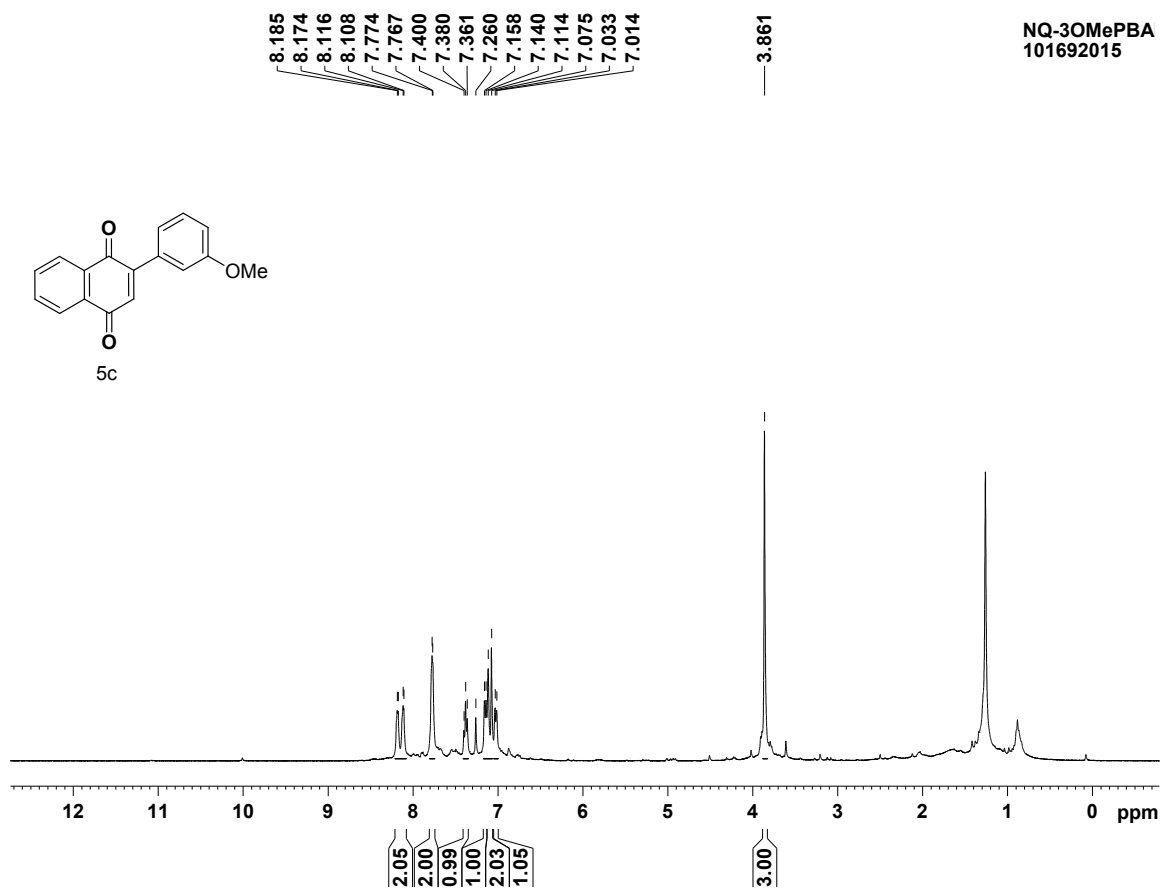



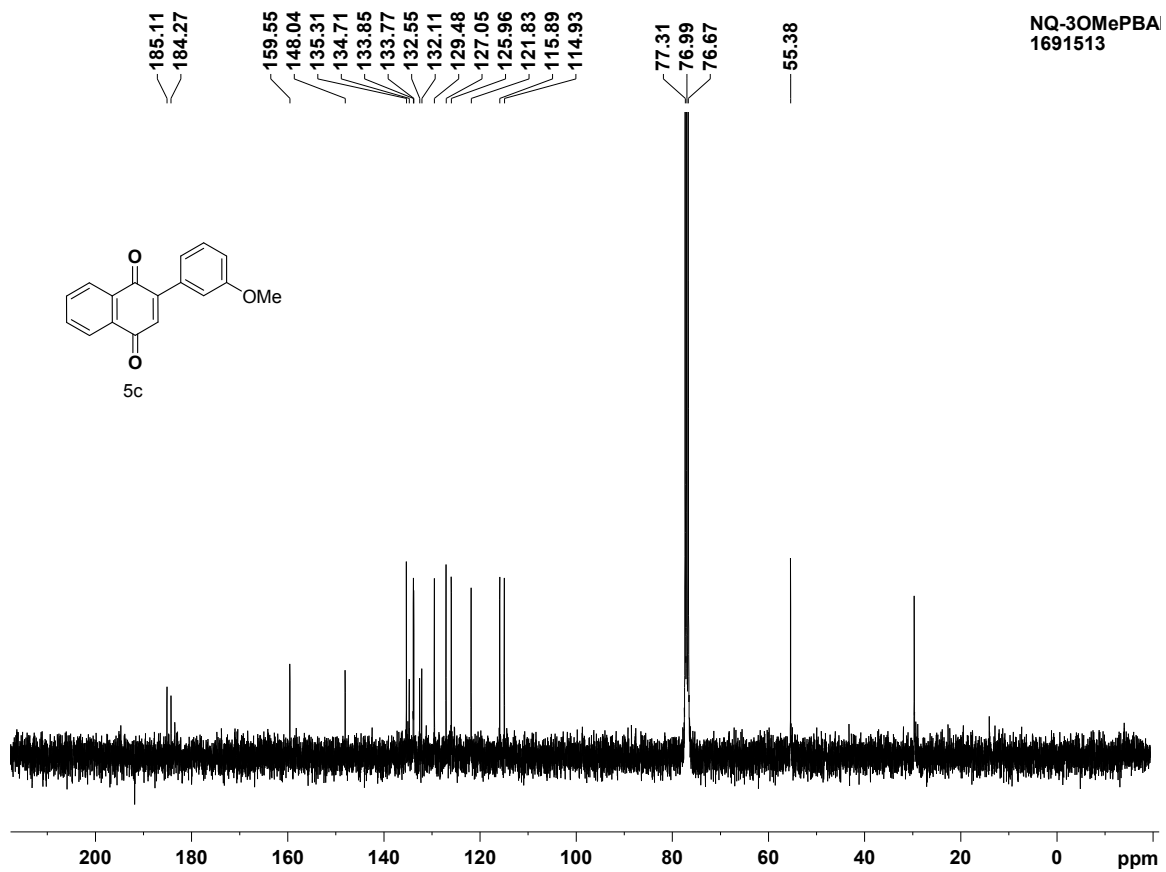

8.219  
8.200  
8.168  
8.150  
7.834  
7.816  
7.797  
7.760  
7.741  
7.723  
7.596  
7.526  
7.508  
7.485  
7.467  
7.447  
7.421  
7.409  
7.403  
7.397  
7.386  
7.260

NQOHPBQ-K  
16-25.3.14

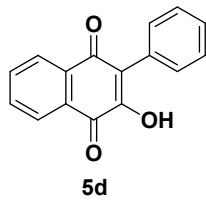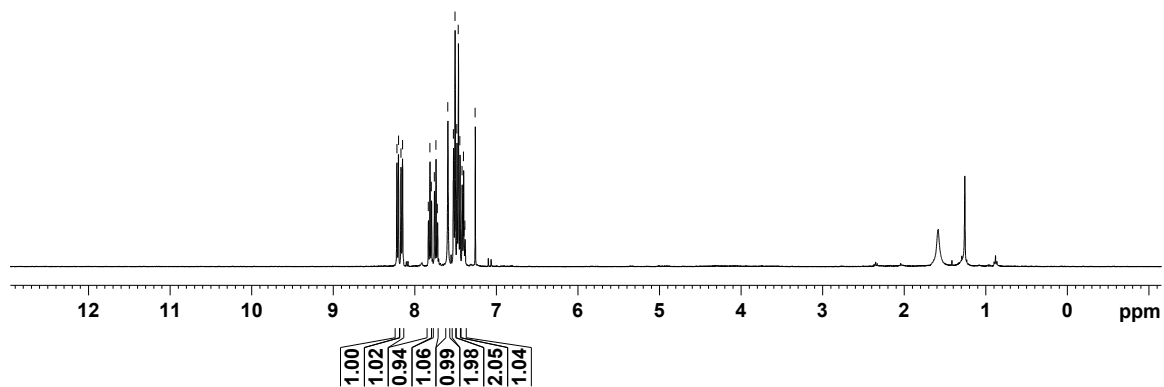

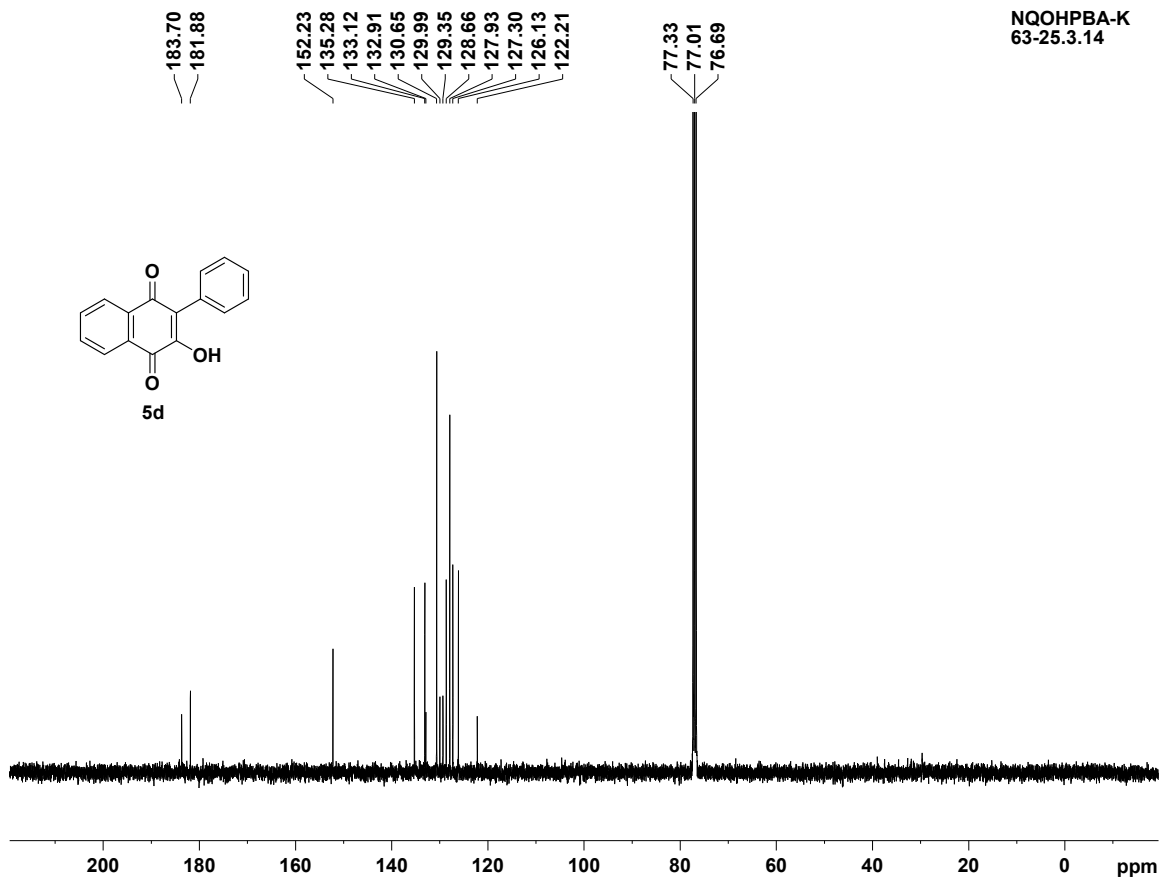

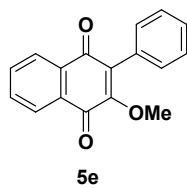

8.142  
8.130  
8.125  
7.755  
7.746  
7.738  
7.451  
7.433  
7.408  
7.370  
7.353  
7.260

3.883

2OMeNQ-PBA-Et  
210915-32

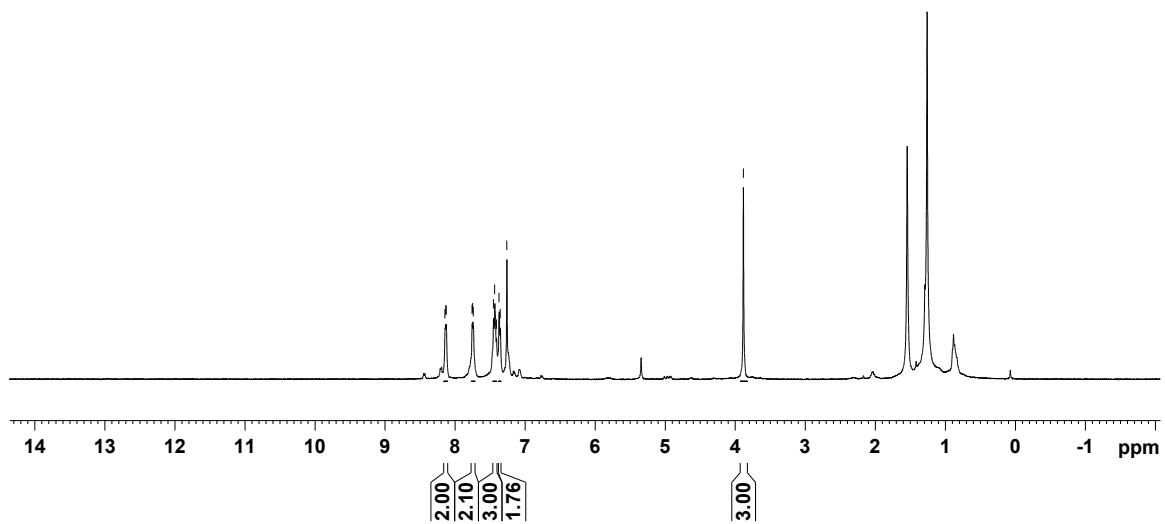

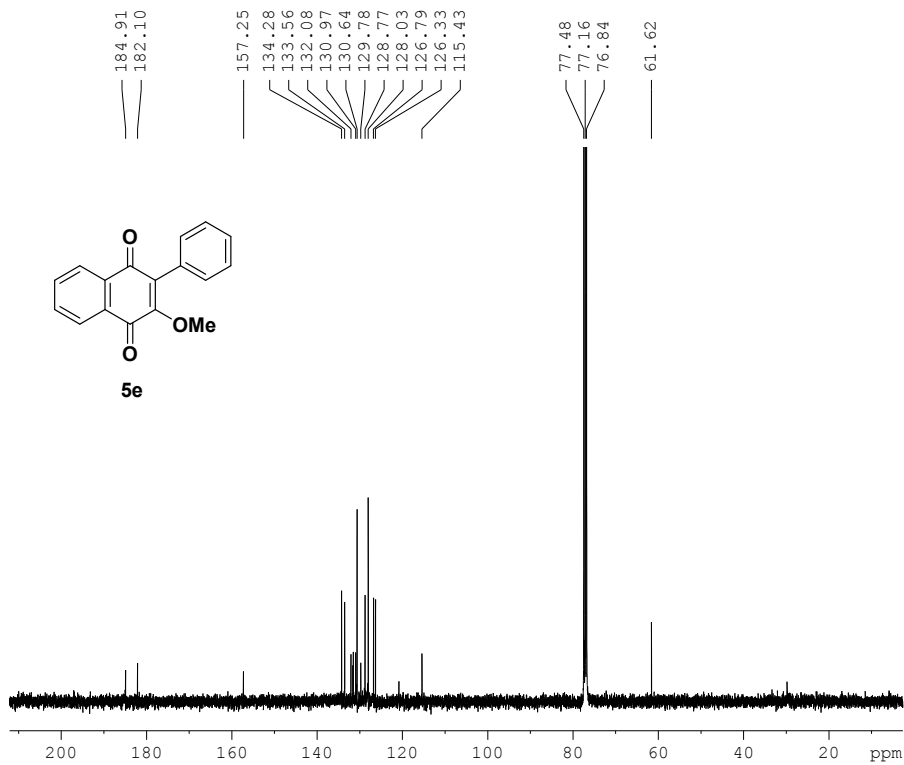

```

Current Data Parameters
NAME      M-NQ-2-OME
EXPNO     2
PROCNO    1

F2 - Acquisition Parameters
Date_     20151007
Time      10.34
INSTRUM   spect
PROBHD    5 mm DUL 13C-1
PULPROG   zgpg30
TD         65536
SOLVENT   cdcl3
NS         1024
DS         4
SWH        24038.461 Hz
FIDRES     0.366798 Hz
AQ         1.3631988 sec
RG         57
DW         20.800 usec
DE         6.00 usec
TE         297.7 K
D1         2.0000000 sec
d11        0.0300000 sec
DELTA     1.8999998 sec
TDO        1

===== CHANNEL f1 =====
NUC1       13C
P1         9.15 usec
PL1        0.00 dB
SFO1       100.6228298 MHz

===== CHANNEL f2 =====
CPDPRG2    waltz16
NUC2       1H
PCPD2      90.00 usec
PL12       14.90 dB
PL13       14.90 dB
PL2        -3.00 dB
SFO2       400.1316005 MHz

F2 - Processing parameters
SI         32768
SF         100.6127534 MHz
WDW        EM
SSB        0
LB         1.00 Hz
GB         0
PC         1.40

```

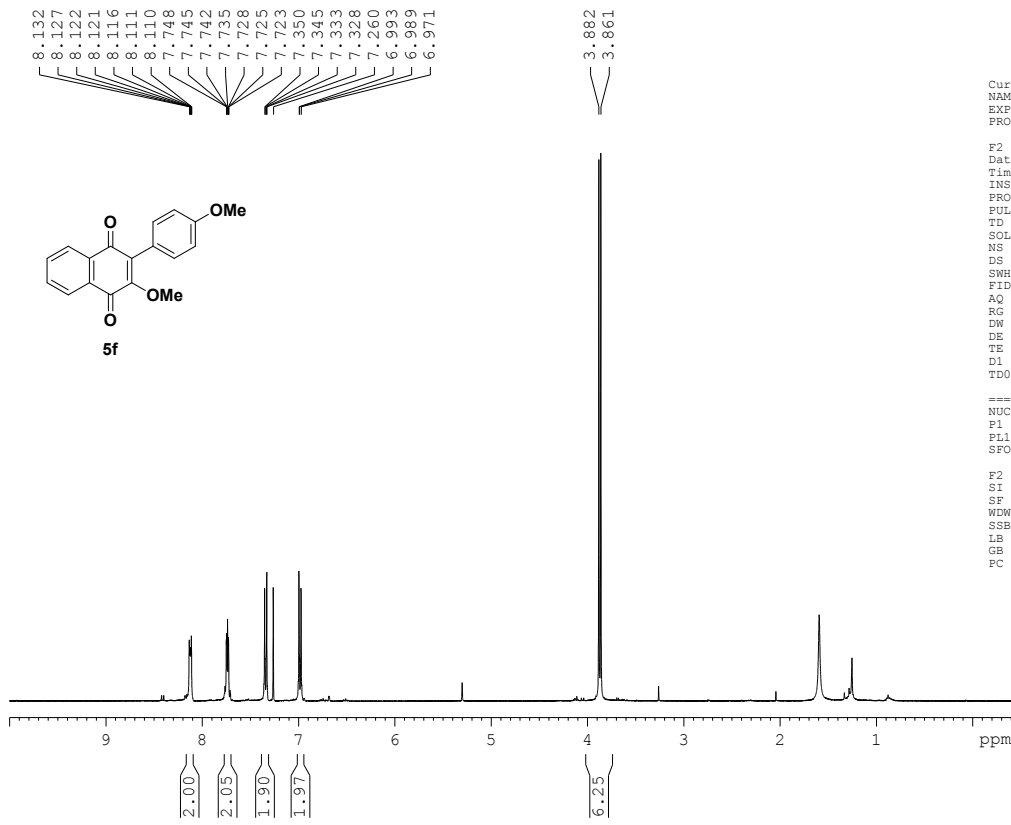

```

Current Data Parameters
NAME          M-NQ-20ME-4
EXPNO         1
PROCNO        1

F2 - Acquisition Parameters
Date_         20151006
Time          16.09
INSTRUM       spect
PROBHD        5 mm DUL 13C-1
PULPROG       zg30
TD            65536
SOLVENT       CDCl3
NS            16
DS            2
SWH           8223.685 Hz
FIDRES       0.125483 Hz
AQ           3.9846397 sec
RG            228
DW           60.800 usec
DE            6.00 usec
TE            296.0 K
D1           1.0000000 sec
TDO           1

===== CHANNEL f1 =====
NUC1          1H
P1            11.42 usec
PL1           -3.00 dB
SFO1         400.1324710 MHz

F2 - Processing parameters
SI            32768
SF           400.1300051 MHz
WDW           EM
SSB           0
LB            0.30 Hz
GB            0
PC            1.00

```

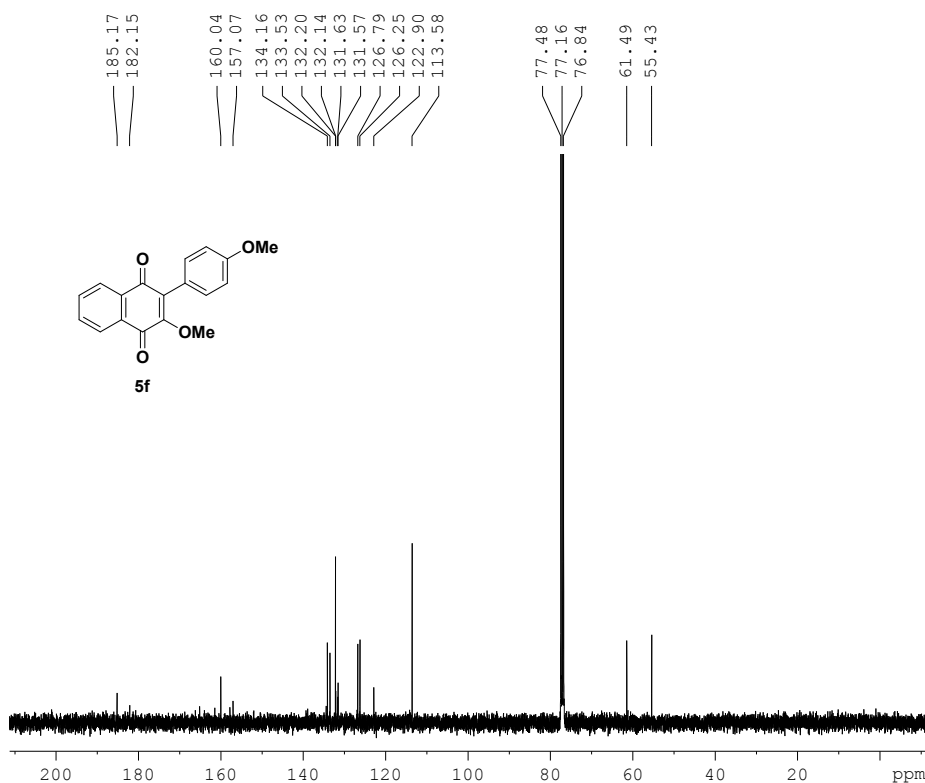

```

Current Data Parameters
NAME          M-NQ-20ME-4
EXPNO         2
PROCNO        1

F2 - Acquisition Parameters
Date_         20151006
Time          16.24
INSTRUM       spect
PROBHD        5 mm DUL 13C-1
PULPROG       zgpg30
TD            65536
SOLVENT       CDC13
NS            256
DS            4
SWH           24038.461 Hz
FIDRES        0.366798 Hz
AQ            1.3631988 sec
RG            64
DW            20.800 usec
DE            6.00 usec
TE            296.5 K
DL            2.00000000 sec
d11           0.03000000 sec
DELTA         1.89999998 sec
TD0           1

===== CHANNEL f1 =====
NUC1          13C
P1            9.15 usec
PL1           0.00 dB
SFO1          100.6228298 MHz

===== CHANNEL f2 =====
CPDPRG2       waltz16
NUC2          1H
PCPD2         90.00 usec
PL12          14.90 dB
PL13          14.90 dB
PL2           -3.00 dB
SFO2          400.1316005 MHz

F2 - Processing parameters
SI            32768
SF            100.6127536 MHz
WDW           EM
SSB           0
LB            1.00 Hz
GB            0
PC            1.40

```

8.715  
8.704  
8.008  
7.989  
7.795  
7.776  
7.752  
7.731  
7.504  
7.485  
7.467  
7.441  
7.423  
7.405  
7.260  
7.252  
7.236

PyPBAK  
5-10.5.14

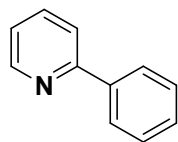

7a

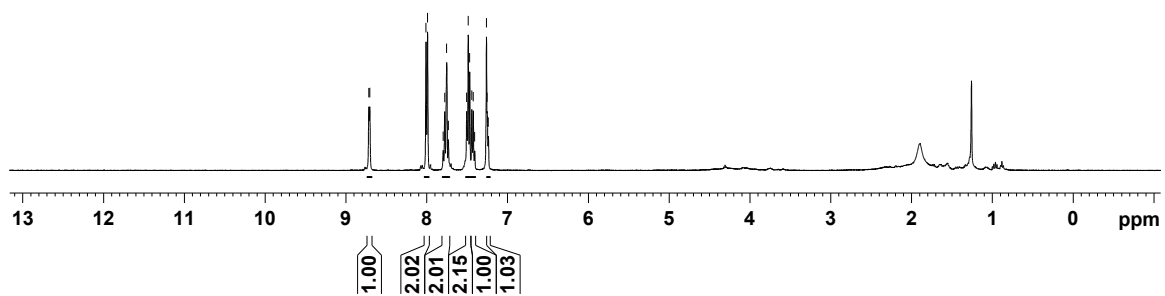



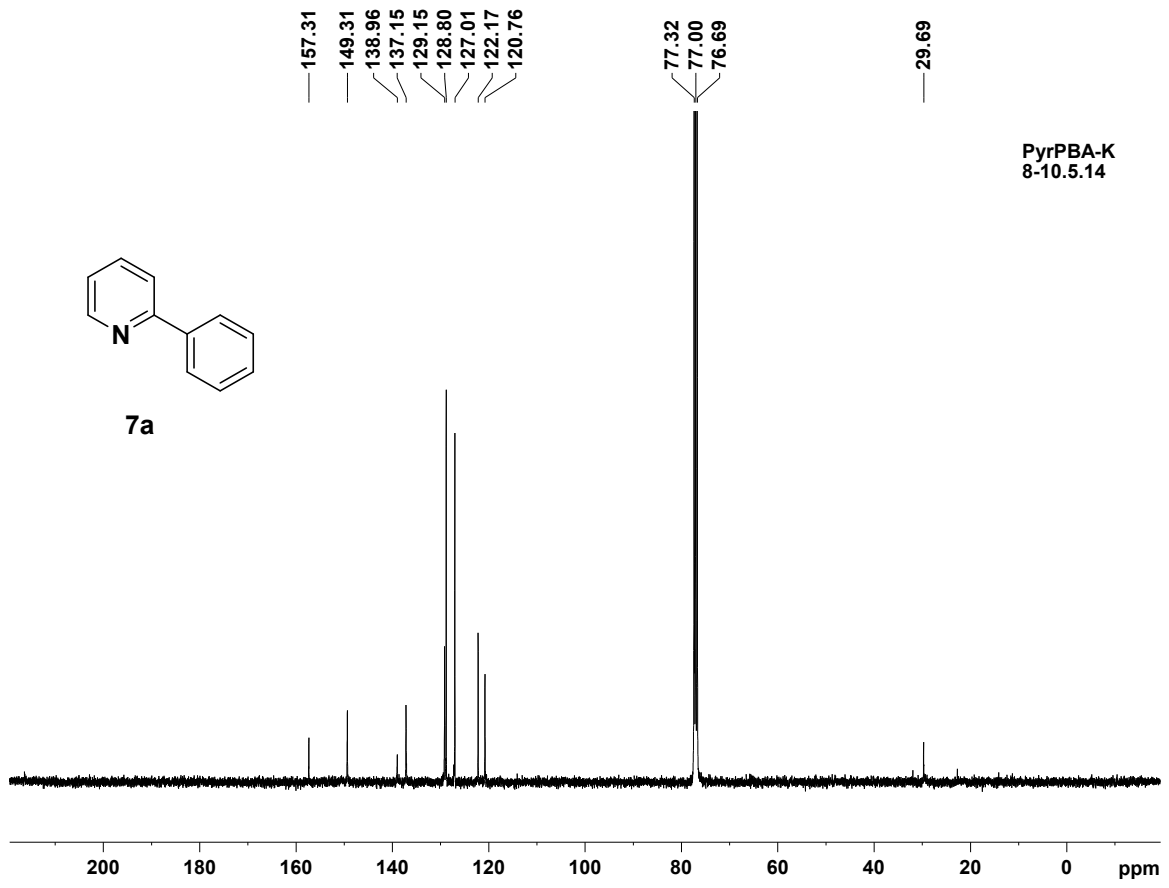

4-PyAcy-PBAK  
7-23.8.14

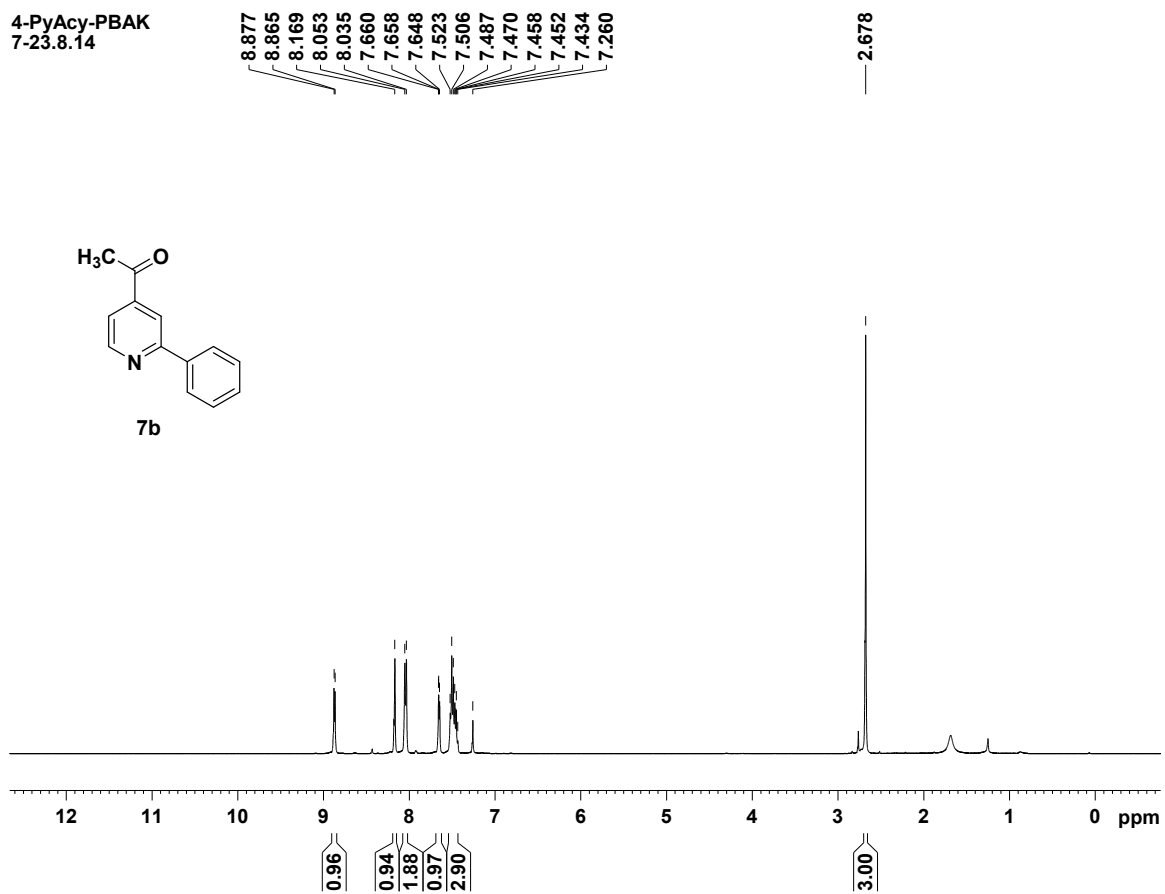

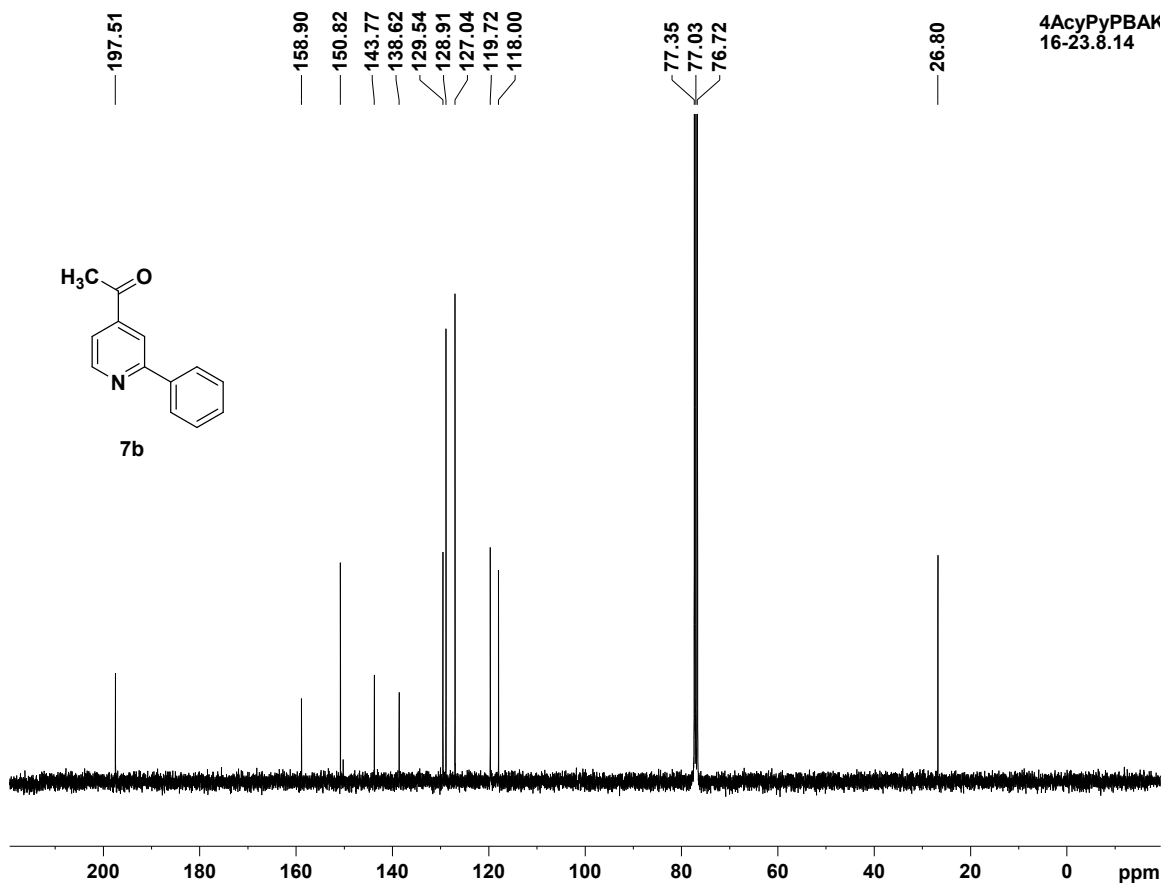

QlinePBAK-S1  
33-12.5.14

8.246  
8.225  
8.214  
8.184  
8.164  
7.898  
7.877  
7.847  
7.827  
7.756  
7.737  
7.717  
7.555  
7.536  
7.518  
7.488  
7.470  
7.452  
7.260

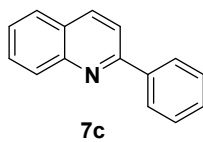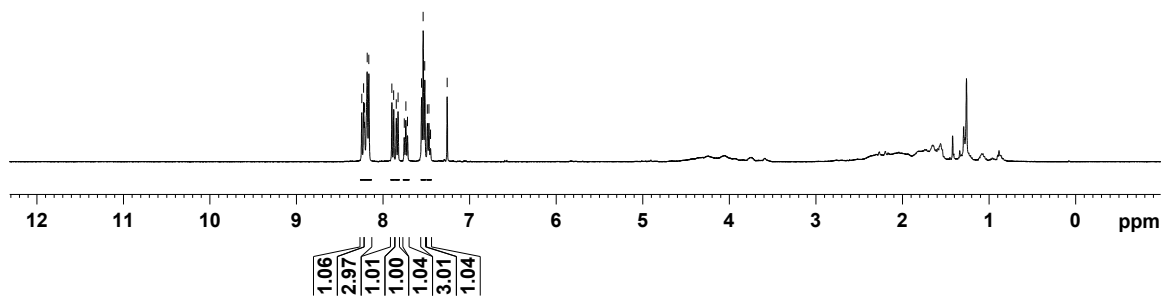

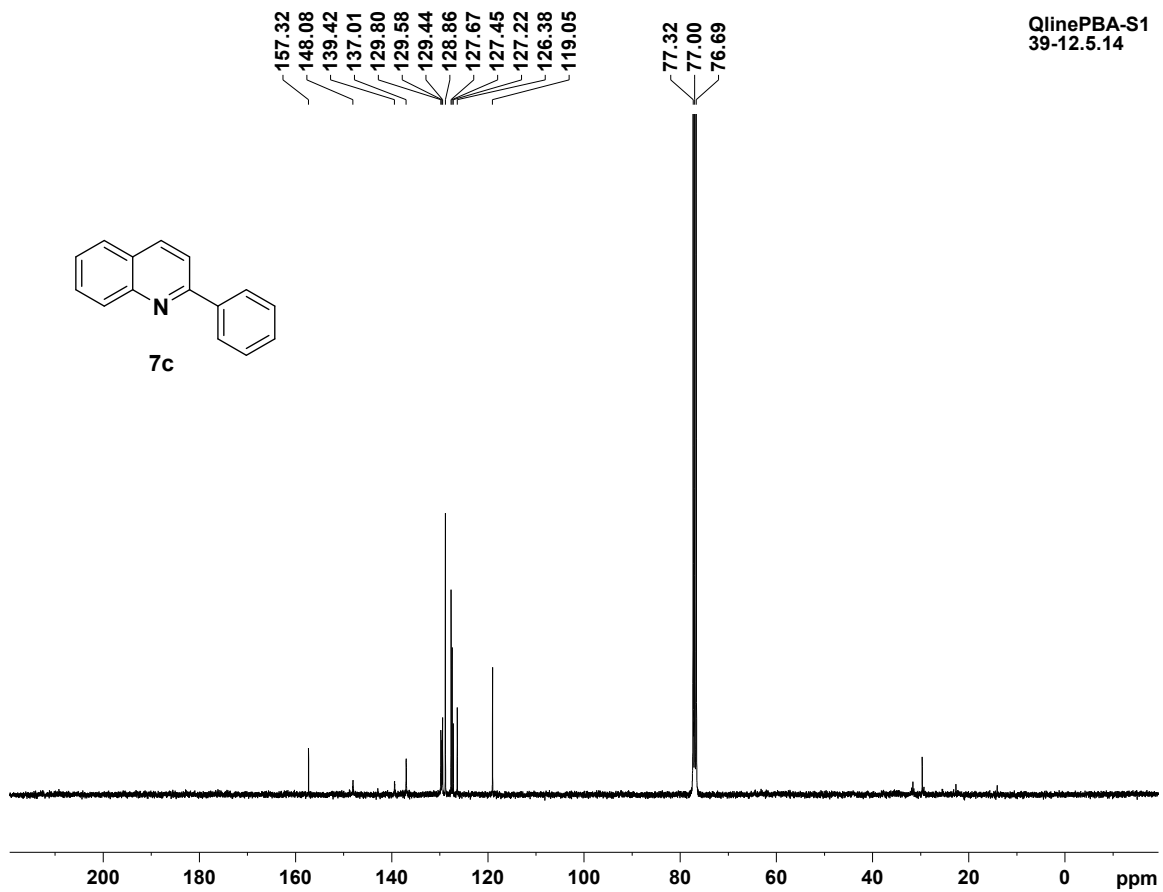

BPYPBAK  
27-04.7.14

8.712  
8.700  
8.664  
8.644  
8.409  
8.390  
8.168  
8.150  
7.915  
7.895  
7.883  
7.876  
7.863  
7.859  
7.844  
7.840  
7.792  
7.773  
7.533  
7.515  
7.496  
7.461  
7.448  
7.443  
7.424  
7.350  
7.348  
7.338  
7.336  
7.332  
7.320  
7.317  
7.260

— 1.262

— 0.079

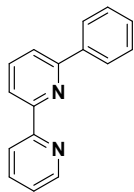

7d

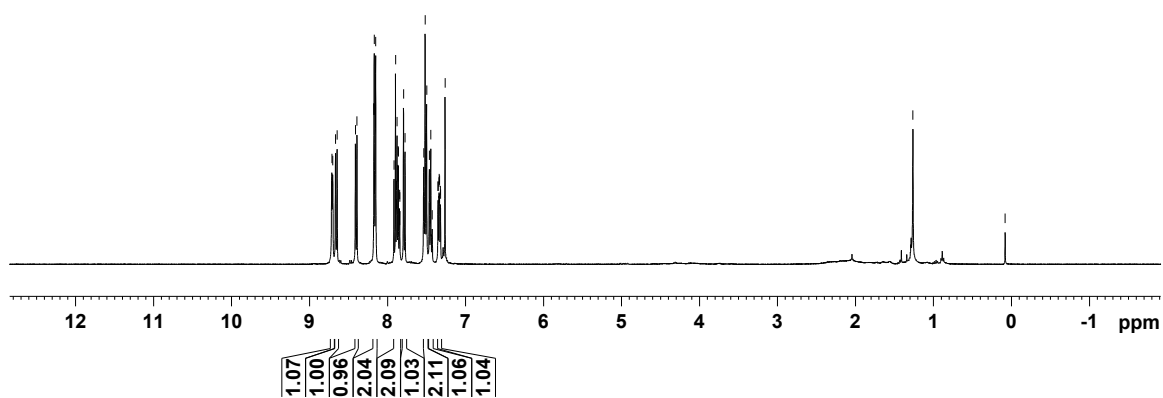

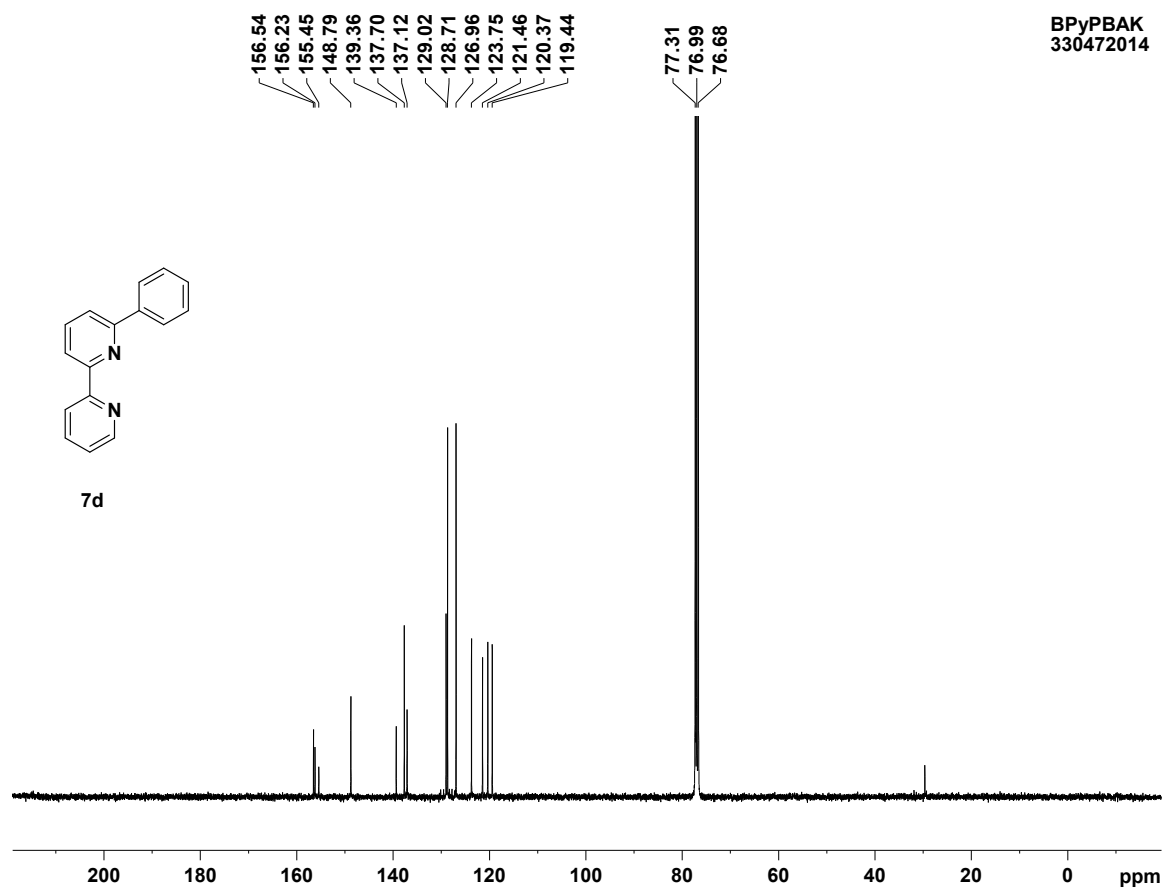

## References:

1. A. Deb, A. Soumithra and D. Maiti, *Adv. synth. Catal.* 2014, **356**, 705.
2. Y. Fujiwara, V. Domingo, I. B. Seiple, R. Gianatassio, D. B. Matthew and P. S. Baran, *J. Am. Chem. Soc.*, 2011, **133**, 3292–3295;
3. J. Wang, S. Wang, G. Wang, J. Zhang and X.-Q. Yu, *Chem. Commun.*, 2012, **48**, 11769–11771;
4. P. Pravin, N. Abhay and K.G. Akamanchi, *J. Org. Chem.*, 2014, **79**, 2331–2336;
5. D. Wang, G. Bingyang, L. Liang, J. Shan and D. Yuqiang, *J. Org. Chem.*, 2014, **79**, 8607–8613.
